# Supplementary material for: Synthesis, Antiproliferative Activity and Molecular Docking Studies of Novel Doubly Modified Colchicine Amides and Sulfonamides as Anticancer Agents
Source: PubMed Central journal article supplement (PMC7221574; doi:10.3390/molecules25081789), 2020-04-14
Supplement: molecules-25-01789-s001.pdf [file molecules-25-01789-s001.pdf]

# Synthesis, Antiproliferative Activity and Molecular Docking Studies of Novel Doubly Modified Colchicine Amides and Sulfonamides as Anticancer Agents

Julia Krzywik<sup>1,2</sup>, Witold Mozga<sup>2</sup>, Maral Aminpour<sup>3</sup>, Jan Janczak<sup>4</sup>, Ewa Maj<sup>5</sup>, Joanna Wietrzyk<sup>5</sup>, Jack A. Tuszyński<sup>3,6</sup> and Adam Huczyński<sup>1,\*</sup>

<sup>1</sup> Department of Medical Chemistry, Faculty of Chemistry, Adam Mickiewicz University, Uniwersytetu Poznańskiego 8, 61-614 Poznań, Poland; [julia.krzywik@amu.edu.pl](mailto:julia.krzywik@amu.edu.pl) (J.K.)

<sup>2</sup> TriMen Chemicals, Piłsudskiego 141, 92-318 Łódź, Poland; [mozga@trimen.pl](mailto:mozga@trimen.pl) (W.M.), [julia@trimen.pl](mailto:julia@trimen.pl) (J.K.)

<sup>3</sup> Department of Oncology, University of Alberta, Edmonton, T6G 1Z2, Canada; [aminpour@ualberta.ca](mailto:aminpour@ualberta.ca) (M.A.), [jack.tuszynski@gmail.com](mailto:jack.tuszynski@gmail.com) (J.A.T.)

<sup>4</sup> Institute of Low Temperature and Structure Research, Polish Academy of Sciences, PO Box 1410, 50-950 Wrocław, Poland; [j.janczak@intibs.pl](mailto:j.janczak@intibs.pl) (J.J.)

<sup>5</sup> Hirszfeld Institute of Immunology and Experimental Therapy, Polish Academy of Sciences, Rudolfa Weigla 12, 53-114 Wrocław, Poland; [ewa.maj@hirszfeld.pl](mailto:ewa.maj@hirszfeld.pl) (E.M.), [joanna.wietrzyk@hirszfeld.pl](mailto:joanna.wietrzyk@hirszfeld.pl) (J.W.)

<sup>6</sup> DIMEAS, Politecnico di Torino, Corso Duca degli Abruzzi, 24, Torino, 10129, Italy

## **Supplementary material**

**Table S1.** Details of the data collection parameters, crystallographic data and the final agreement parameters. (for compounds **6**, **11**, **12**, **14**, **15**, **16**, **18** and **19**).

**Table S2.** Optimized parameters for colchicine derivatives (**6**, **11**, **12**, **14**, **15**, **16**, **18** and **19**).

**Figure S1.** The LC-MS chromatogram and mass spectra of **2**.

**Figure S2.** The <sup>1</sup>H NMR spectrum of **2** in CDCl<sub>3</sub>.

**Figure S3.** The <sup>13</sup>C NMR spectrum of **2** in CDCl<sub>3</sub>.

**Figure S4.** The LC-MS chromatogram and mass spectra of **3**.

**Figure S5.** The <sup>1</sup>H NMR spectrum of **3** in CDCl<sub>3</sub>.

**Figure S6.** The <sup>13</sup>C NMR spectrum of **3** in CDCl<sub>3</sub>.

**Figure S7.** The LC-MS chromatogram and mass spectra of **4**.

**Figure S8.** The <sup>1</sup>H NMR spectrum of **4** in CDCl<sub>3</sub>.

**Figure S9.** The <sup>13</sup>C NMR spectrum of **4** in CDCl<sub>3</sub>.

**Figure S10.** The LC-MS chromatogram and mass spectra of **5**.

**Figure S11.** The <sup>1</sup>H NMR spectrum of **5** in CDCl<sub>3</sub>.

**Figure S12.** The <sup>13</sup>C NMR spectrum of **5** in CDCl<sub>3</sub>.

**Figure S13.** The LC-MS chromatogram and mass spectra of **6**.

**Figure S14.** The <sup>1</sup>H NMR spectrum of **6** in CDCl<sub>3</sub>.

**Figure S15.** The <sup>13</sup>C NMR spectrum of **6** in CDCl<sub>3</sub>.

**Figure S16.** The LC-MS chromatogram and mass spectra of **7**.  
**Figure S17.** The  $^1\text{H}$  NMR spectrum of **7** in  $\text{CDCl}_3$ .  
**Figure S18.** The  $^{13}\text{C}$  NMR spectrum of **7** in  $\text{CDCl}_3$ .  
**Figure S19.** The LC-MS chromatogram and mass spectra of **8**.  
**Figure S20.** The  $^1\text{H}$  NMR spectrum of **8** in  $\text{CDCl}_3$ .  
**Figure S21.** The  $^{13}\text{C}$  NMR spectrum of **8** in  $\text{CDCl}_3$ .  
**Figure S22.** The LC-MS chromatogram and mass spectra of **9**.  
**Figure S23.** The  $^1\text{H}$  NMR spectrum of **9** in  $\text{CDCl}_3$ .  
**Figure S24.** The  $^{13}\text{C}$  NMR spectrum of **9** in  $\text{CDCl}_3$ .  
**Figure S25.** The LC-MS chromatogram and mass spectra of **10**.  
**Figure S26.** The  $^1\text{H}$  NMR spectrum of **10** in  $\text{CDCl}_3$ .  
**Figure S27.** The  $^{13}\text{C}$  NMR spectrum of **10** in  $\text{CDCl}_3$ .  
**Figure S28.** The LC-MS chromatogram and mass spectra of **11**.  
**Figure S29.** The  $^1\text{H}$  NMR spectrum of **11** in  $\text{CDCl}_3$ .  
**Figure S30.** The  $^{13}\text{C}$  NMR spectrum of **11** in  $\text{CDCl}_3$ .  
**Figure S31.** The LC-MS chromatogram and mass spectra of **12**.  
**Figure S32.** The  $^1\text{H}$  NMR spectrum of **12** in  $\text{CDCl}_3$ .  
**Figure S33.** The  $^{13}\text{C}$  NMR spectrum of **12** in  $\text{CDCl}_3$ .  
**Figure S34.** The LC-MS chromatogram and mass spectra of **13**.  
**Figure S35.** The  $^1\text{H}$  NMR spectrum of **13** in  $\text{CD}_2\text{Cl}_2$ .  
**Figure S36.** The  $^{13}\text{C}$  NMR spectrum of **13** in  $\text{CD}_2\text{Cl}_2$ .  
**Figure S37.** The LC-MS chromatogram and mass spectra of **14**.  
**Figure S38.** The  $^1\text{H}$  NMR spectrum of **14** in  $\text{CDCl}_3$ .  
**Figure S39.** The  $^{13}\text{C}$  NMR spectrum of **14** in  $\text{CDCl}_3$ .  
**Figure S40.** The LC-MS chromatogram and mass spectra of **15**.  
**Figure S41.** The  $^1\text{H}$  NMR spectrum of **15** in  $\text{CDCl}_3$ .  
**Figure S42.** The  $^{13}\text{C}$  NMR spectrum of **15** in  $\text{CDCl}_3$ .  
**Figure S43.** The LC-MS chromatogram and mass spectra of **16**.  
**Figure S44.** The  $^1\text{H}$  NMR spectrum of **16** in  $\text{CDCl}_3$ .  
**Figure S45.** The  $^{13}\text{C}$  NMR spectrum of **16** in  $\text{CDCl}_3$ .  
**Figure S46.** The LC-MS chromatogram and mass spectra of **17**.  
**Figure S47.** The  $^1\text{H}$  NMR spectrum of **17** in  $\text{CDCl}_3$ .  
**Figure S48.** The LC-MS chromatogram and mass spectra of **18**.  
**Figure S49.** The  $^1\text{H}$  NMR spectrum of **18** in  $\text{CDCl}_3$ .  
**Figure S50.** The  $^{13}\text{C}$  NMR spectrum of **18** in  $\text{CDCl}_3$ .  
**Figure S51.** The LC-MS chromatogram and mass spectra of **19**.  
**Figure S52.** The  $^1\text{H}$  NMR spectrum of **19** in  $(\text{CD}_3)_2\text{SO}$ .  
**Figure S53.** The  $^{13}\text{C}$  NMR spectrum of **19** in  $(\text{CD}_3)_2\text{SO}$ .  
**Figure S54.** The LC-MS chromatogram and mass spectra of **20**.  
**Figure S55.** The  $^1\text{H}$  NMR spectrum of **20** in  $\text{CDCl}_3$ .  
**Figure S56.** The  $^{13}\text{C}$  NMR spectrum of **20** in  $\text{CDCl}_3$ .  
**Figure S57.** The LC-MS chromatogram and mass spectra of **21**.

**Figure S58.** The  $^1\text{H}$  NMR spectrum of **21** in  $\text{CDCl}_3$ .

**Figure S59.** The  $^{13}\text{C}$  NMR spectrum of **21** in  $\text{CDCl}_3$ .

**Figure S60.** Molecular structure of colchicine derivatives (**6**, **11**, **12**, **14**, **15**, **16**, **18** and **19**) at 295 K and 100 K.

**Table S1.** Details of the data collection parameters, crystallographic data and the final agreement parameters (for compounds **6**, **11**, **12**, **14**, **15**, **16**, **18** and **19**).

| Crystal size(mm)                                                         | <b>6</b><br>C <sub>25</sub> H <sub>32</sub> N <sub>2</sub> O <sub>5</sub><br>0.32 × 0.27 × 0.21 |                            | <b>11</b><br>C <sub>24</sub> H <sub>27</sub> F <sub>3</sub> N <sub>2</sub> O <sub>5</sub><br>0.33 × 0.27 × 0.22 |                            | <b>12</b><br>C <sub>27</sub> H <sub>28</sub> N <sub>2</sub> O <sub>5</sub><br>0.31 × 0.29 × 0.23 |                            | <b>14</b><br>C <sub>27</sub> H <sub>27</sub> FN <sub>2</sub> O <sub>5</sub><br>0.28 × 0.22 × 0.15 |                            |
|--------------------------------------------------------------------------|-------------------------------------------------------------------------------------------------|----------------------------|-----------------------------------------------------------------------------------------------------------------|----------------------------|--------------------------------------------------------------------------------------------------|----------------------------|---------------------------------------------------------------------------------------------------|----------------------------|
|                                                                          | Mol. weight                                                                                     | 440.52                     | 440.52                                                                                                          | 480.47                     | 480.47                                                                                           | 460.51                     | 460.51                                                                                            | 478.50                     |
| Temp. [K]                                                                | 100(1)                                                                                          | 295(1)                     | 100(1)                                                                                                          | 295(1)                     | 100(1)                                                                                           | 295(1)                     | 100(1)                                                                                            | 295(1)                     |
| Crystal system                                                           | trigonal                                                                                        | trigonal                   | trigonal                                                                                                        | trigonal                   | trigonal                                                                                         | trigonal                   | trigonal                                                                                          | trigonal                   |
| Space group                                                              | <i>P</i> 3 <sub>2</sub> 21                                                                      | <i>P</i> 3 <sub>2</sub> 21 | <i>P</i> 3 <sub>2</sub> 21                                                                                      | <i>P</i> 3 <sub>2</sub> 21 | <i>P</i> 3 <sub>2</sub> 21                                                                       | <i>P</i> 3 <sub>2</sub> 21 | <i>P</i> 3 <sub>2</sub> 21                                                                        | <i>P</i> 3 <sub>2</sub> 21 |
| <i>a</i> , [Å]                                                           | 9.7178(4)                                                                                       | 9.9846(3)                  | 9.8538(4)                                                                                                       | 9.9997(4)                  | 9.9014(3)                                                                                        | 9.9641(3)                  | 9.9118(3)                                                                                         | 10.0282(3)                 |
| <i>b</i> , [Å]                                                           | 9.7178(4)                                                                                       | 9.9846(3)                  | 9.8538(4)                                                                                                       | 9.9997(4)                  | 9.9014(3)                                                                                        | 9.9641(3)                  | 9.9118(3)                                                                                         | 10.0282(3)                 |
| <i>c</i> , [Å]                                                           | 42.2684(14)                                                                                     | 41.8491(11)                | 41.929(2)                                                                                                       | 41.834(2)                  | 41.7786(16)                                                                                      | 41.691(2)                  | 41.722(2)                                                                                         | 41.793(2)                  |
| $\alpha$ , [°]                                                           | 90.0                                                                                            | 90.0                       | 90.0                                                                                                            | 90.0                       | 90.0                                                                                             | 90.0                       | 90.0                                                                                              | 90.0                       |
| $\beta$ , [°]                                                            | 90.0                                                                                            | 90.0                       | 90.0                                                                                                            | 90.0                       | 90.0                                                                                             | 90.0                       | 90.0                                                                                              | 90.0                       |
| $\gamma$ , [°]                                                           | 120.0                                                                                           | 120.0                      | 120.0                                                                                                           | 120.0                      | 120.0                                                                                            | 120.0                      | 120.0                                                                                             | 120.0                      |
| <i>V</i> , [Å <sup>3</sup> ]                                             | 3456.9(3)                                                                                       | 3613.1(3)                  | 3525.8(3)                                                                                                       | 3622.7(3)                  | 3547.1(3)                                                                                        | 3584.7(2)                  | 3549.8(2)                                                                                         | 3639.8(2)                  |
| <i>Z</i>                                                                 | 6                                                                                               | 6                          | 6                                                                                                               | 6                          | 6                                                                                                | 6                          | 6                                                                                                 | 6                          |
| $\lambda$ , (MoK $\alpha$ ) [Å]                                          | 0.71073                                                                                         | 0.71073                    | 0.71073                                                                                                         | 0.71073                    | 0.71073                                                                                          | 0.71073                    | 0.71073                                                                                           | 0.71073                    |
| $\mu$ [mm <sup>-1</sup> ]                                                | 0.088                                                                                           | 0.085                      | 0.110                                                                                                           | 0.107                      | 0.090                                                                                            | 0.090                      | 0.098                                                                                             | 0.096                      |
| <i>D</i> <sub>calc</sub> [g·cm <sup>-3</sup> ]                           | 1.270                                                                                           | 1.215                      | 1.358                                                                                                           | 1.321                      | 1.293                                                                                            | 1.283                      | 1.343                                                                                             | 1.310                      |
| <i>F</i> (000)                                                           | 1416                                                                                            | 1416                       | 1512                                                                                                            | 1512                       | 1464                                                                                             | 1464                       | 1512                                                                                              | 1512                       |
| <i>T</i> <sub>min</sub> / <i>T</i> <sub>max</sub>                        | 0.9628/1.0                                                                                      | 0.9628/1.0                 | 0.9697/1.0                                                                                                      | 0.9697/1.0                 | 0.9522/1.0                                                                                       | 0.9872/1.0                 | 0.9618/1.0                                                                                        | 0.9622/1.0                 |
| $\theta$ range, [°]                                                      | 2.42÷27.99                                                                                      | 2.41÷28.00                 | 2.58÷27.99                                                                                                      | 2.58÷27.99                 | 2.57÷28.00                                                                                       | 2.36÷27.99                 | 2.56÷27.50                                                                                        | 2.40÷28.00                 |
| Refls collected, unique and observed, <i>I</i> > 2 $\sigma$ ( <i>I</i> ) | 36324<br>5550<br>4640                                                                           | 65309<br>5814<br>4253      | 36030<br>5669<br>5063                                                                                           | 56405<br>5830<br>4192      | 47745<br>5705<br>5149                                                                            | 67834<br>5784<br>4510      | 44528<br>5426<br>4852                                                                             | 64873<br>5846<br>5087      |
| <i>R</i> <sub>int</sub>                                                  | 0.0637                                                                                          | 0.0520                     | 0.0713                                                                                                          | 0.0843                     | 0.0463                                                                                           | 0.0469                     | 0.0416                                                                                            | 0.0350                     |
| <i>R</i> [ <i>F</i> <sup>2</sup> > 2 $\sigma$ ( <i>F</i> <sup>2</sup> )] | 0.0534                                                                                          | 0.0605                     | 0.0631                                                                                                          | 0.0758                     | 0.0401                                                                                           | 0.0490                     | 0.0590                                                                                            | 0.0598                     |
| w <i>R</i> ( <i>F</i> <sup>2</sup> ) all refls                           | 0.1221                                                                                          | 0.1474                     | 0.1397                                                                                                          | 0.1979                     | 0.0938                                                                                           | 0.1145                     | 0.1579                                                                                            | 0.1592                     |
| Goodness-of-fit, <i>S</i>                                                | 1.014                                                                                           | 1.037                      | 1.008                                                                                                           | 1.056                      | 1.001                                                                                            | 1.002                      | 1.059                                                                                             | 1.002                      |
| $\Delta\rho_{\max}$ ; $\Delta\rho_{\min}$ [eÅ <sup>-3</sup> ]            | 0.31; -0.34                                                                                     | 0.23, -0.17                | 0.26, -0.32                                                                                                     | 0.24, -0.31                | 0.26, -0.29                                                                                      | 0.16, -0.15                | 0.90, -0.61                                                                                       | 0.85, -0.34                |
| Flack parameter                                                          | 0.1(6)                                                                                          | 0.7(6)                     | 0.0(4)                                                                                                          | -0.1(6)                    | 0.3(4)                                                                                           | 0.3(5)                     | 0.3(8)                                                                                            | -0.4(4)                    |

| Crystal size(mm)                                                         | <b>15</b><br>C <sub>26</sub> H <sub>27</sub> N <sub>3</sub> O <sub>5</sub><br>0.29 × 0.26 × 0.15 |                            | <b>16</b><br>C <sub>26</sub> H <sub>27</sub> N <sub>3</sub> O <sub>5</sub><br>0.32 × 0.25 × 0.19 |                            | <b>18</b><br>C <sub>22</sub> H <sub>29</sub> N <sub>3</sub> O <sub>6</sub> S<br>0.32 × 0.25 × 0.19 |                                                       | <b>19</b><br>C <sub>22</sub> H <sub>26</sub> N <sub>2</sub> O <sub>6</sub> S<br>0.29 × 0.21 × 0.16 |                         |
|--------------------------------------------------------------------------|--------------------------------------------------------------------------------------------------|----------------------------|--------------------------------------------------------------------------------------------------|----------------------------|----------------------------------------------------------------------------------------------------|-------------------------------------------------------|----------------------------------------------------------------------------------------------------|-------------------------|
|                                                                          | Mol. weight                                                                                      | 461.50                     | 461.50                                                                                           | 461.50                     | 461.50                                                                                             | 463.54                                                | 463.54                                                                                             | 446.51                  |
| Temp. [K]                                                                | 100(1)                                                                                           | 295(1)                     | 100(1)                                                                                           | 295(1)                     | 100(1)                                                                                             | 295(1)                                                | 100(1)                                                                                             | 295(1)                  |
| Crystal system                                                           | trigonal                                                                                         | trigonal                   | trigonal                                                                                         | trigonal                   | orthorhombic                                                                                       | orthorhombic                                          | monoclinic                                                                                         | monoclinic              |
| Space group                                                              | <i>P</i> 3 <sub>2</sub> 21                                                                       | <i>P</i> 3 <sub>2</sub> 21 | <i>P</i> 3 <sub>2</sub> 21                                                                       | <i>P</i> 3 <sub>2</sub> 21 | <i>P</i> 2 <sub>1</sub> 2 <sub>1</sub> 2 <sub>1</sub>                                              | <i>P</i> 2 <sub>1</sub> 2 <sub>1</sub> 2 <sub>1</sub> | <i>P</i> 2 <sub>1</sub>                                                                            | <i>P</i> 2 <sub>1</sub> |
| <i>a</i> , [Å]                                                           | 9.8951(3)                                                                                        | 9.9988(3)                  | 9.8283(3)                                                                                        | 9.9641(3)                  | 7.4663(3)                                                                                          | 7.5770(2)                                             | 8.9687(3)                                                                                          | 9.1044(5)               |
| <i>b</i> , [Å]                                                           | 9.8951(3)                                                                                        | 9.9988(3)                  | 9.8283(3)                                                                                        | 9.9641(3)                  | 11.8854(5)                                                                                         | 12.0086(3)                                            | 8.7611(3)                                                                                          | 8.7682(4)               |
| <i>c</i> , [Å]                                                           | 41.6172(11)                                                                                      | 41.776(2)                  | 41.596(2)                                                                                        | 41.691(2)                  | 25.5743(9)                                                                                         | 25.8218(6)                                            | 14.2839(5)                                                                                         | 14.3323(7)              |
| $\alpha$ , [°]                                                           | 90.0                                                                                             | 90.0                       | 90.0                                                                                             | 90.0                       | 90.0                                                                                               | 90.0                                                  | 90.0                                                                                               | 90.0                    |
| $\beta$ , [°]                                                            | 90.0                                                                                             | 90.0                       | 90.0                                                                                             | 90.0                       | 90.0                                                                                               | 90.0                                                  | 99.874(3)                                                                                          | 100.30(1)               |
| $\gamma$ , [°]                                                           | 120.0                                                                                            | 120.0                      | 120.0                                                                                            | 120.0                      | 90.0                                                                                               | 90.0                                                  | 90.0                                                                                               | 90.0                    |
| <i>V</i> , [Å <sup>3</sup> ]                                             | 3528.9(2)                                                                                        | 3617.1(2)                  | 3479.7(3)                                                                                        | 3584.7(2)                  | 2269.46(1)                                                                                         | 2349.5(1)                                             | 1105.74(7)                                                                                         | 1125.7(1)               |
| <i>Z</i>                                                                 | 6                                                                                                | 6                          | 6                                                                                                | 6                          | 4                                                                                                  | 4                                                     | 2                                                                                                  | 2                       |
| $\lambda$ , (MoK $\alpha$ ) [Å]                                          | 0.71073                                                                                          | 0.71073                    | 0.71073                                                                                          | 0.71073                    | 0.71073                                                                                            | 0.71073                                               | 0.71073                                                                                            | 0.71073                 |
| $\mu$ [mm <sup>-1</sup> ]                                                | 0.091                                                                                            | 0.089                      | 0.093                                                                                            | 0.090                      | 0.186                                                                                              | 0.180                                                 | 0.187                                                                                              | 0.184                   |
| <i>D</i> <sub>calc</sub> [g·cm <sup>-3</sup> ]                           | 1.303                                                                                            | 1.271                      | 1.321                                                                                            | 1.283                      | 1.357                                                                                              | 1.310                                                 | 1.341                                                                                              | 1.317                   |
| <i>F</i> (000)                                                           | 1464                                                                                             | 1464                       | 1464                                                                                             | 1464                       | 984                                                                                                | 984                                                   | 472                                                                                                | 472                     |
| <i>T</i> <sub>min</sub> / <i>T</i> <sub>max</sub>                        | 0.9594/1.0                                                                                       | 0.9594/1.0                 | 0.9872/1.0                                                                                       | 0.9872/1.0                 | 0.9778/1.0                                                                                         | 0.9782/1.0                                            | 0.9700/1.0                                                                                         | 0.9705/1.0              |
| $\theta$ range, [°]                                                      | 2.67÷28.00                                                                                       | 2.67÷28.00                 | 2.39÷28.00                                                                                       | 2.36÷27.99                 | 2.84÷26.99                                                                                         | 2.80÷27.00                                            | 2.50÷26.99                                                                                         | 2.47÷26.99              |
| Refls collected, unique and observed, <i>I</i> > 2 $\sigma$ ( <i>I</i> ) | 66157<br>5677<br>5301                                                                            | 61740<br>5529<br>4110      | 95268<br>5596<br>4906                                                                            | 67834<br>5784<br>4510      | 30386<br>4954<br>3993                                                                              | 72807<br>5135<br>3866                                 | 19325<br>4794<br>4345                                                                              | 17917<br>4877<br>3769   |
| <i>R</i> <sub>int</sub>                                                  | 0.0700                                                                                           | 0.0550                     | 0.0590                                                                                           | 0.0469                     | 0.0728                                                                                             | 0.0735                                                | 0.0409                                                                                             | 0.0377                  |
| <i>R</i> [ <i>F</i> <sup>2</sup> > 2 $\sigma$ ( <i>F</i> <sup>2</sup> )] | 0.0587                                                                                           | 0.0560                     | 0.0485                                                                                           | 0.0490                     | 0.0443                                                                                             | 0.0471                                                | 0.0347                                                                                             | 0.0434                  |
| w <i>R</i> ( <i>F</i> <sup>2</sup> ) all refls                           | 0.1377                                                                                           | 0.1218                     | 0.1149                                                                                           | 0.1145                     | 0.0890                                                                                             | 0.0947                                                | 0.0762                                                                                             | 0.0957                  |
| Goodness-of-fit, <i>S</i>                                                | 1.002                                                                                            | 1.061                      | 1.000                                                                                            | 1.002                      | 1.001                                                                                              | 1.001                                                 | 1.000                                                                                              | 1.000                   |
| $\Delta\rho_{\max}$ ; $\Delta\rho_{\min}$ [eÅ <sup>-3</sup> ]            | 0.29, -0.28                                                                                      | 0.15, -0.18                | 0.42, -0.37                                                                                      | 0.16, -0.15                | 0.23, -0.35                                                                                        | 0.15, -0.23                                           | 0.18, -0.28                                                                                        | 0.16, -0.32             |
| Flack parameter                                                          | 0.0(4)                                                                                           | -0.7(4)                    | -0.2(3)                                                                                          | 0.3(5)                     | -0.07(5)                                                                                           | -0.02(3)                                              | 0.04(4)                                                                                            | -0.03(4)                |

**Table S2.** Optimized parameters for colchicine derivatives (**6**, **11**, **12**, **14**, **15**, **16**, **18** and **19**).

(a) **6**

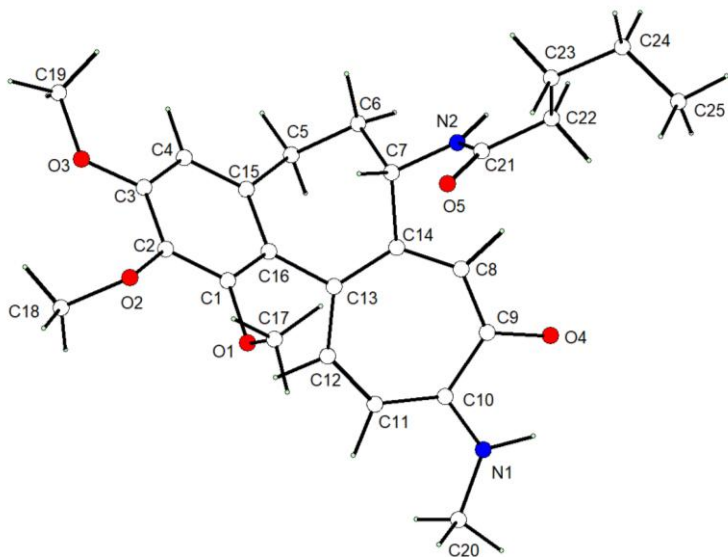

|                 |         |                |         |             |        |
|-----------------|---------|----------------|---------|-------------|--------|
| C1–O1           | 1.397   | C2–O2          | 1.395   | C3–O3       | 1.392  |
| O1–C17          | 1.479   | O2–C18         | 1.472   | O3–C19      | 1.456  |
| C10–N1          | 1.358   | N1–C20         | 1.453   | C9–O4       | 1.285  |
| C7–N2           | 1.463   | N2–C21         | 1.373   | C21–O5      | 1.256  |
| C21–C22         | 1.520   | C22–C23        | 1.543   | C23–C24     | 1.543  |
| C24–C25         | 1.540   | C1–C2          | 1.404   | C2–C3       | 1.407  |
| C3–C4           | 1.399   | C4–C15         | 1.403   | C15–C16     | 1.415  |
| C15–C5          | 1.516   | C5–C6          | 1.550   | C6–C7       | 1.549  |
| C7–C14          | 1.546   | C14–C8         | 1.385   | C8–C9       | 1.429  |
| C9–C10          | 1.483   | C10–C11        | 1.495   | C11–C12     | 1.406  |
| C12–C13         | 1.396   | C13–C14        | 1.433   |             |        |
| C1–O1–C17       | 116.31  | C2–O2–C18      | 117.13  | C3–O3–C19   | 118.94 |
| C1–C16–C13      | 121.26  | C16–C13–C14    | 119.03  | C16–C15–C5  | 119.17 |
| C4–C15–C5       | 120.35  | C15–C5–C6      | 111.89  | C5–C6–C7    | 112.40 |
| C6–C7–C14       | 111.60  | C7–C14–C13     | 115.32  | C6–C7–N2    | 109.35 |
| C7–N2–C21       | 122.21  | N2–C21–O2      | 121.68  | N2–C21–C22  | 116.28 |
| C21–C22–C23     | 112.24  | C22–C23–C24    | 113.73  | C23–C24–C25 | 114.34 |
| C10–N1–C20      | 125.95  | C11–C10–N1     | 121.94  | C9–C10–N1   | 111.70 |
| C8–C9–O4        | 119.75  | O4–C9–C10      | 116.38  | C8–C9–C10   | 123.86 |
| C9–C10–C11      | 126.36  | C10–C11–C12    | 130.53  | C11–C12–C13 | 132.26 |
| C1–C16–C13–C12  | 53.14   | C17–O1–C1–C2   | -72.99  |             |        |
| C18–O2–C2–C3    | 70.11   | C19–O3–C3–C4   | -4.01   |             |        |
| O1–C1–C2–O2     | 6.07    | O2–C2–C3–O3    | -4.85   |             |        |
| C11–C10–N1–C20  | -0.89   | N1–C10–C9–O4   | 1.07    |             |        |
| C1–C16–C13–C14  | -127.47 | C3–C4–C15–C5   | -177.12 |             |        |
| C4–C15–C5–C6    | 107.24  | C15–C5–C6–C7   | 42.24   |             |        |
| C5–C6–C7–N2     | 175.23  | C5–C6–C7–C14   | 47.32   |             |        |
| C6–C7–C14–C13   | -77.84  | C7–C14–C13–C16 | 2.74    |             |        |
| C14–C13–C16–C15 | 53.70   | C14–C7–N2–C21  | -87.08  |             |        |
| C7–N2–C21–O5    | -0.98   | N2–C21–C22–C23 | 134.11  |             |        |
| C17–O1–C1–C16   | 108.72  |                |         |             |        |

(b) 11

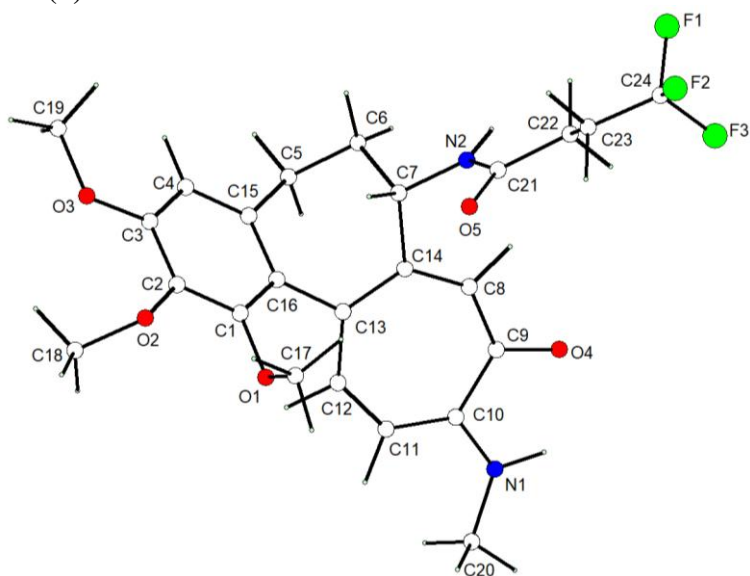

|                 |        |             |                |             |        |
|-----------------|--------|-------------|----------------|-------------|--------|
| C1–O1           | 1.397  | C2–O2       | 1.395          | C3–O3       | 1.392  |
| O1–C17          | 1.479  | O2–C18      | 1.472          | O3–C19      | 1.456  |
| C10–N1          | 1.357  | N1–C20      | 1.453          | C9–O4       | 1.284  |
| C7–N2           | 1.465  | N2–C21      | 1.368          | C21–O5      | 1.255  |
| C21–C22         | 1.525  | C22–C23     | 1.535          | C23–C24     | 1.501  |
| C24–F1          | 1.408  | C24–F2      | 1.400          | C24–F3      | 1.405  |
| C1–C2           | 1.404  | C2–C3       | 1.407          | C3–C4       | 1.399  |
| C4–C15          | 1.403  | C15–C16     | 1.415          | C1–C16      | 1.415  |
| C15–C5          | 1.516  | C6–C6       | 1.550          | C6–C7       | 1.548  |
| C7–C14          | 1.546  | C14–C13     | 1.433          | C14–C8      | 1.385  |
| C8–C9           | 1.429  | C9–C10      | 1.483          | C10–C11     | 1.395  |
| C11–C12         | 1.406  | C12–C13     | 1.396          | C13–C16     | 1.501  |
| C1–O1–C17       | 116.65 | C2–O2–C18   | 117.23         | C3–O3–C19   | 118.98 |
| C1–C16–C13      | 121.29 | O1–C1–C2    | 119.31         | O2–C2–C3    | 121.85 |
| O3–C3–C4        | 124.15 | C4–C15–C5   | 120.20         | C15–C5–C6   | 112.03 |
| C5–C6–C7        | 112.23 | C6–C7–C14   | 111.72         | C7–C14–C13  | 115.34 |
| C14–C13–C16     | 119.11 | C14–C8–C9   | 134.35         | C8–C9–C10   | 123.86 |
| C8–C9–O4        | 119.71 | O4–C9–C10   | 116.43         | C9–C10–N1   | 111.69 |
| C10–N1–C20      | 125.99 | N1–C10–C11  | 122.00         | C10–C11–C12 | 130.53 |
| C11–C12–C13     | 132.34 | C12–C13–C14 | 124.59         | C12–C13–C16 | 116.30 |
| C23–C24–F1      | 112.68 | C23–C24–F2  | 112.00         | C23–C24–F3  | 112.94 |
| C1–C16–C13–C12  |        | 52.32       | C17–O1–C1–C2   | -70.70      |        |
| C18–O2–C2–C3    |        | 68.81       | C19–O3–C3–C4   | -3.68       |        |
| O1–C1–C2–O2     |        | 5.82        | O2–C2–C3–O3    | -4.33       |        |
| C11–C10–N1–C20  |        | -0.91       | N1–C10–C9–O4   | 1.07        |        |
| C1–C16–C13–C14  |        | -128.43     | C3–C4–C15–C5   | -177.65     |        |
| C4–C15–C5–C6    |        | 107.54      | C15–C5–C6–C7   | 42.31       |        |
| C5–C6–C7–N2     |        | 174.97      | C5–C6–C7–C14   | 47.21       |        |
| C6–C7–C14–C13   |        | -78.18      | C7–C14–C13–C16 | 3.28        |        |
| C14–C13–C16–C15 |        | 53.15       | C14–C7–N2–C21  | -86.58      |        |
| C7–N2–C21–O5    |        | -1.57       | N2–C21–C22–C23 | 161.04      |        |
| C21–C22–C23–C24 |        | 177.11      | C22–C23–C24–F1 | 59.90       |        |
| C22–C23–C24–F2  |        | 179.64      | C22–C23–C24–F3 | -60.14      |        |
| C17–O1–C1–C16   |        | 111.35      |                |             |        |

(c) 12

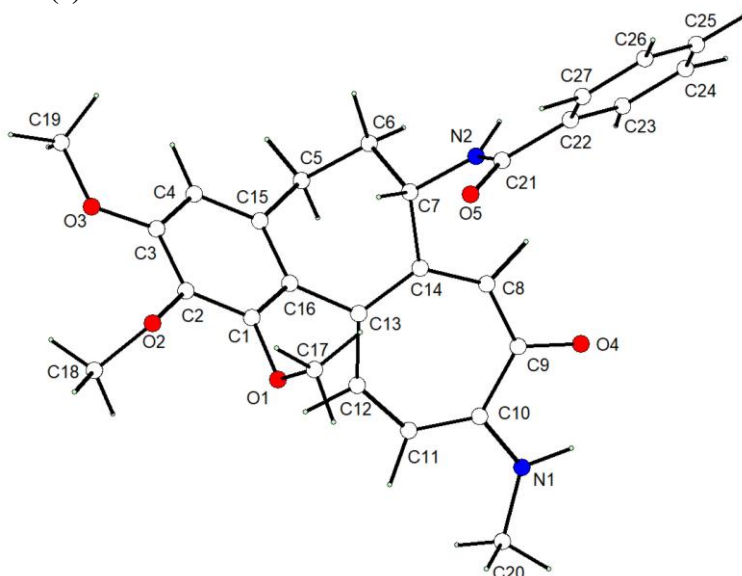

|                 |         |                 |         |             |        |
|-----------------|---------|-----------------|---------|-------------|--------|
| C1-O1           | 1.375   | C2-O2           | 1.373   | C3-O3       | 1.365  |
| O1-C17          | 1.439   | O2-C18          | 1.432   | O3-C19      | 1.422  |
| C10-N1          | 1.350   | N1-C20          | 1.445   | C9-O4       | 1.254  |
| C7-N2           | 1.455   | N2-C21          | 1.371   | C21-O5      | 1.231  |
| C1-C2           | 1.402   | C2-C3           | 1.408   | C3-C4       | 1.398  |
| C4-C15          | 1.400   | C15-C16         | 1.410   | C1-C16      | 1.413  |
| C15-C5          | 1.514   | C5-C6           | 1.545   | C6-C7       | 1.544  |
| C7-C14          | 1.543   | C14-C8          | 1.381   | C8-C9       | 1.436  |
| C9-C10          | 1.490   | C10-C11         | 1.392   | C11-C12     | 1.406  |
| C12-C13         | 1.391   | C13-C14         | 1.433   | C13-C16     | 1.500  |
| C1-O1-C17       | 114.71  | C2-O2-C18       | 115.11  | C3-O3-C19   | 118.49 |
| C1-C16-C13      | 121.34  | O1-C1-C2        | 118.52  | O2-C2-C3    | 120.67 |
| O3-C3-C4        | 124.77  | C4-C15-C5       | 120.21  | C15-C5-C6   | 111.96 |
| C5-C6-C7        | 112.66  | C6-C7-C14       | 111.53  | C7-C14-C13  | 115.24 |
| C14-C13-C16     | 119.19  | C14-C8-C9       | 134.67  | C8-C9-C10   | 123.06 |
| C8-C9-O4        | 120.20  | O4-C9-C10       | 116.74  | C9-C10-N1   | 111.41 |
| C10-N1-C20      | 126.26  | N1-C10-C11      | 122.10  | C10-C11-C12 | 130.64 |
| C11-C12-C13     | 132.47  | C12-C13-C14     | 124.45  | C12-C13-C16 | 116.35 |
| C1-C16-C13-C12  | 53.39   | C17-O1-C1-C2    | -80.30  |             |        |
| C18-O2-C2-C3    | 82.09   | C19-O3-C3-C4    | -2.00   |             |        |
| O1-C1-C2-O2     | 4.82    | O2-C2-C3-O3     | -4.20   |             |        |
| C11-C10-N1-C20  | -1.38   | N1-C10-C9-O4    | 1.78    |             |        |
| C1-C16-C13-C14  | -127.62 | C3-C4-C15-C5    | -177.11 |             |        |
| C4-C15-C5-C6    | 107.46  | C15-C5-C6-C7    | 42.75   |             |        |
| C5-C6-C7-N2     | 174.80  | C5-C6-C7-C14    | 47.76   |             |        |
| C6-C7-C14-C13   | -78.83  | C7-C14-C13-C16  | 3.34    |             |        |
| C14-C13-C16-C15 | 53.58   | C14-C7-N2-C21   | -91.67  |             |        |
| C7-N2-C21-O5    | 0.17    | N2-C21-C22-C23  | -28.25  |             |        |
| O5-C21-C22-C23  | 152.51  | C21-C22-C23-C24 | -179.24 |             |        |

(d) 14

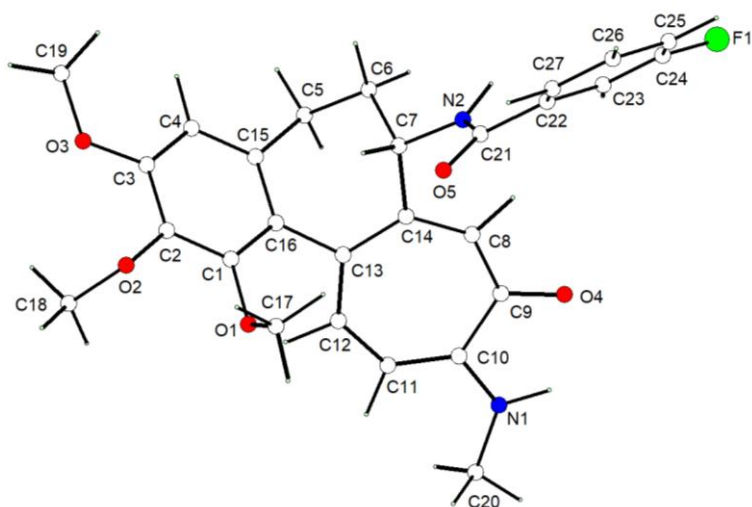

|                 |         |                 |         |             |        |
|-----------------|---------|-----------------|---------|-------------|--------|
| C1-O1           | 1.375   | C2-O2           | 1.373   | C3-O3       | 1.365  |
| O1-C17          | 1.439   | O2-C18          | 1.433   | O3-C19      | 1.422  |
| C10-N1          | 1.350   | N1-C20          | 1.445   | C9-O4       | 1.253  |
| C7-N2           | 1.456   | N2-C21          | 1.369   | C21-O5      | 1.230  |
| C1-C2           | 1.402   | C2-C3           | 1.408   | C3-C4       | 1.399  |
| C4-C15          | 1.400   | C15-C16         | 1.410   | C1-C16      | 1.413  |
| C15-C5          | 1.514   | C5-C6           | 1.545   | C6-C7       | 1.544  |
| C7-C14          | 1.543   | C14-C13         | 1.432   | C13-C16     | 1.500  |
| C14-C8          | 1.381   | C8-C9           | 1.436   | C9-C10      | 1.490  |
| C10-C11         | 1.392   | C11-C12         | 1.405   | C12-C13     | 1.391  |
| C21-C22         | 1.507   | C22-C23         | 1.403   | C23-C24     | 1.389  |
| C24-C25         | 1.389   | C25-C26         | 1.398   | C26-C27     | 1.395  |
| C27-C22         | 1.402   | C24-F1          | 1.360   |             |        |
| C1-O1-C17       | 114.78  | C2-O2-C18       | 115.13  | C3-O3-C19   | 118.48 |
| C1-C16-C13      | 121.31  | O1-C1-C2        | 118.57  | O2-C2-C3    | 120.66 |
| O3-C3-C4        | 124.74  | C4-C15-C5       | 120.23  | C15-C5-C6   | 112.00 |
| C5-C6-C7        | 112.75  | C6-C7-C14       | 111.58  | C7-C14-C13  | 115.20 |
| C14-C13-C16     | 119.25  | C14-C8-C9       | 134.66  | C8-C9-C10   | 123.09 |
| C8-C9-O4        | 120.17  | O4-C9-C10       | 116.74  | C9-C10-N1   | 111.41 |
| C10-N1-C20      | 126.27  | N1-C10-C11      | 122.12  | C10-C11-C12 | 130.63 |
| C11-C12-C13     | 132.52  | C12-C13-C14     | 124.44  | C12-C13-C16 | 116.30 |
| C1-C16-C13-C12  | 53.54   | C17-O1-C1-C2    | -80.03  |             |        |
| C18-O2-C2-C3    | 82.28   | C19-O3-C3-C4    | -1.89   |             |        |
| O1-C1-C2-O2     | 4.96    | O2-C2-C3-O3     | -4.23   |             |        |
| C11-C10-N1-C20  | -0.96   | N1-C10-C9-O4    | 1.45    |             |        |
| C1-C16-C13-C14  | -127.54 | C3-C4-C15-C5    | -177.30 |             |        |
| C4-C15-C5-C6    | 107.81  | C15-C5-C6-C7    | 42.48   |             |        |
| C5-C6-C7-N2     | 174.95  | C5-C6-C7-C14    | 46.97   |             |        |
| C6-C7-C14-C13   | -77.56  | C7-C14-C13-C16  | 2.92    |             |        |
| C14-C13-C16-C15 | 53.84   | C14-C7-N2-C21   | -91.42  |             |        |
| C7-N2-C21-O5    | 1.16    | N2-C21-C22-C23  | -27.73  |             |        |
| O5-C21-C22-C23  | 153.15  | C21-C22-C23-C24 | -179.60 |             |        |
| C22-C23-C24-C25 | -0.18   | C22-C23-C24-F1  | 179.42  |             |        |



(e) 15

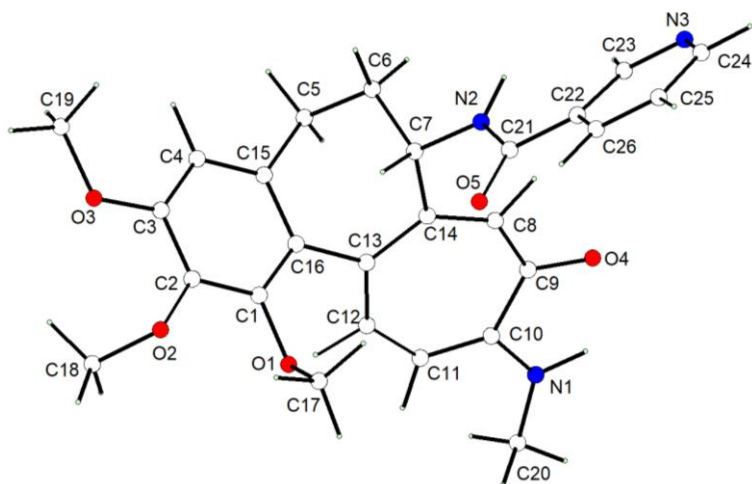

|                 |         |                |         |             |        |
|-----------------|---------|----------------|---------|-------------|--------|
| C1-O1           | 1.397   | C2-O2          | 1.395   | C3-O3       | 1.392  |
| O1-C17          | 1.479   | O2-C18         | 1.472   | O3-C19      | 1.456  |
| C10-N1          | 1.358   | N1-C20         | 1.453   | C9-O4       | 1.284  |
| C7-N2           | 1.464   | N2-C21         | 1.370   | C21-O5      | 1.258  |
| C1-C2           | 1.403   | C2-C3          | 1.407   | C3-C4       | 1.399  |
| C4-C15          | 1.403   | C15-C16        | 1.415   | C1-C16      | 1.415  |
| C15-C5          | 1.516   | C5-C6          | 1.551   | C6-C7       | 1.548  |
| C7-C14          | 1.546   | C14-C13        | 1.433   | C13-C16     | 1.501  |
| C14-C8          | 1.385   | C8-C9          | 1.430   | C9-C10      | 1.484  |
| C10-C11         | 1.395   | C11-C12        | 1.406   | C12-C13     | 1.396  |
| C21-C22         | 1.498   | C22-C23        | 1.405   | C23-N3      | 1.351  |
| N3-C24          | 1.353   | C24-C25        | 1.401   | C25-C26     | 1.398  |
| C1-O1-C17       | 116.35  | C2-O2-C18      | 116.99  | C3-O3-C19   | 118.97 |
| C1-C16-C13      | 121.31  | O1-C1-C2       | 119.16  | O2-C2-C3    | 121.68 |
| O3-C3-C4        | 124.23  | C4-C15-C5      | 120.28  | C15-C5-C6   | 111.91 |
| C5-C6-C7        | 112.11  | C6-C7-C14      | 111.65  | C7-C14-C13  | 115.19 |
| C14-C13-C16     | 118.99  | C14-C8-C9      | 134.22  | C8-C9-C10   | 123.84 |
| C8-C9-O4        | 119.77  | O4-C9-C10      | 116.38  | C9-C10-N1   | 111.67 |
| C10-N1-C20      | 125.97  | N1-C10-C11     | 121.94  | C10-C11-C12 | 130.52 |
| C11-C12-C13     | 132.24  | C12-C13-C14    | 124.65  | C12-C13-C16 | 116.35 |
| C22-C23-N3      | 123.35  | C23-N3-C24     | 117.95  | N3-C24-C25  | 122.77 |
| C24-C25-C26     | 118.78  | C26-C22-C23    | 117.84  | C21-C22-C26 | 118.05 |
| C1-C16-C13-C12  | 52.88   | C17-O1-C1-C2   | -72.91  |             |        |
| C18-O2-C2-C3    | 71.05   | C19-O3-C3-C4   | -3.78   |             |        |
| O1-C1-C2-O2     | 6.00    | O2-C2-C3-O3    | -4.89   |             |        |
| C11-C10-N1-C20  | -1.19   | N1-C10-C9-O4   | 1.51    |             |        |
| C1-C16-C13-C14  | -127.78 | C3-C4-C15-C5   | -177.09 |             |        |
| C4-C15-C5-C6    | 107.16  | C15-C5-C6-C7   | 42.40   |             |        |
| C5-C6-C7-N2     | 175.15  | C5-C6-C7-C14   | 47.37   |             |        |
| C6-C7-C14-C13   | -78.49  | C7-C14-C13-C16 | 3.35    |             |        |
| C14-C13-C16-C15 | 53.35   | C14-C7-N2-C21  | -87.31  |             |        |
| C7-N2-C21-O5    | -0.45   | N2-C21-C22-C23 | -17.97  |             |        |
| C21-C22-C23-N3  | 179.53  | C22-C23-N3-C24 | 0.46    |             |        |
| C7-C14-C8-C9    | -179.77 | C13-C16-C15-C5 | -4.22   |             |        |

(f) 16

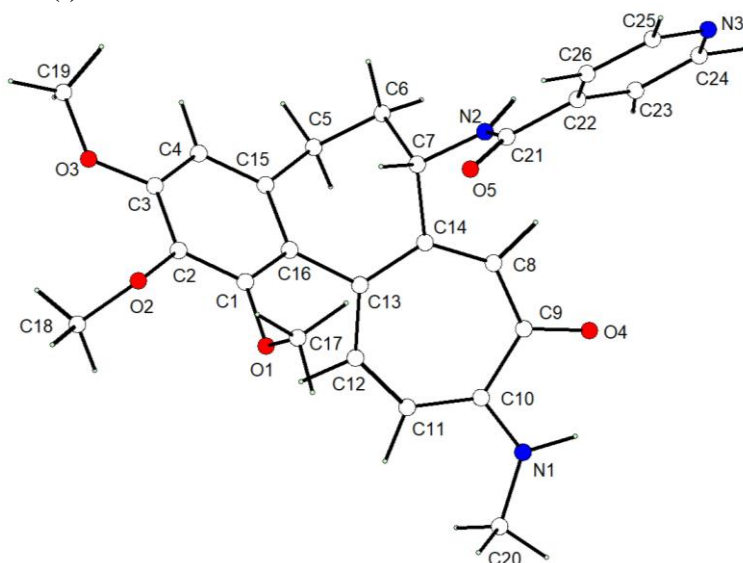

|                 |         |                |         |             |        |
|-----------------|---------|----------------|---------|-------------|--------|
| C1-O1           | 1.374   | C2-O2          | 1.373   | C3-O3       | 1.365  |
| O1-C17          | 1.439   | O2-C18         | 1.433   | O3-C19      | 1.422  |
| C10-N1          | 1.350   | N1-C20         | 1.445   | C9-O4       | 1.253  |
| C7-N2           | 1.456   | N2-C21         | 1.367   | C21-O5      | 1.229  |
| C1-C2           | 1.402   | C2-C3          | 1.408   | C3-C4       | 1.399  |
| C4-C15          | 1.400   | C15-C16        | 1.410   | C1-C16      | 1.413  |
| C15-C5          | 1.514   | C5-C6          | 1.545   | C6-C7       | 1.544  |
| C7-C14          | 1.543   | C14-C13        | 1.432   | C13-C16     | 1.500  |
| C14-C8          | 1.381   | C8-C9          | 1.436   | C9-C10      | 1.490  |
| C10-C11         | 1.392   | C11-C12        | 1.405   | C12-C13     | 1.392  |
| C21-C22         | 1.508   | C22-C23        | 1.400   | C23-C24     | 1.398  |
| C24-N3          | 1.338   | N3-C25         | 1.341   | C25-C26     | 1.395  |
| C1-O1-C17       | 114.85  | C2-O2-C18      | 115.18  | C3-O3-C19   | 118.53 |
| C1-C16-C13      | 119.97  | O1-C1-C2       | 118.62  | O2-C2-C3    | 120.73 |
| O3-C3-C4        | 124.77  | C4-C15-C5      | 120.19  | C15-C5-C6   | 111.98 |
| C5-C6-C7        | 112.56  | C6-C7-C14      | 111.62  | C7-C14-C13  | 115.21 |
| C14-C13-C16     | 119.22  | C14-C8-C9      | 134.69  | C8-C9-C10   | 123.05 |
| C8-C9-O4        | 120.16  | O4-C9-C10      | 116.78  | C9-C10-N1   | 111.42 |
| C10-N1-C20      | 126.28  | N1-C10-C11     | 122.11  | C10-C11-C12 | 130.66 |
| C11-C12-C13     | 132.51  | C12-C13-C14    | 124.39  | C12-C13-C16 | 116.39 |
| C6-C7-N2        | 109.36  | C7-N2-C21      | 122.20  | N2-C21-O5   | 122.79 |
| N2-C21-C22      | 116.03  | C21-C22-C23    | 123.81  | C22-C23-C24 | 118.75 |
| C23-C24-N3      | 123.75  | C24-N3-C25     | 117.06  | N3-C25-C26  | 123.77 |
| C1-C16-C13-C12  | 53.27   | C17-O1-C1-C2   | -79.35  |             |        |
| C18-O2-C2-C3    | 81.14   | C19-O3-C3-C4   | -1.89   |             |        |
| O1-C1-C2-O2     | 4.87    | O2-C2-C3-O3    | -4.06   |             |        |
| C11-C10-N1-C20  | -1.33   | N1-C10-C9-O4   | 1.72    |             |        |
| C1-C16-C13-C14  | -127.76 | C3-C4-C15-C5   | -177.24 |             |        |
| C4-C15-C5-C6    | 107.45  | C15-C5-C6-C7   | 42.67   |             |        |
| C5-C6-C7-N2     | 174.84  | C5-C6-C7-C14   | 46.87   |             |        |
| C6-C7-C14-C13   | -77.86  | C7-C14-C13-C16 | 3.27    |             |        |
| C14-C13-C16-C15 | 53.47   | C14-C7-N2-C21  | -91.33  |             |        |
| C7-N2-C21-O5    | -0.05   | N2-C21-C22-C23 | -29.97  |             |        |
| C21-C22-C23-C24 | -179.12 | C22-C23-C24-N3 | -0.47   |             |        |
| C23-C24-N3-C25  | 0.93    | C24-N3-C25-C26 | -0.21   |             |        |

(g) 18

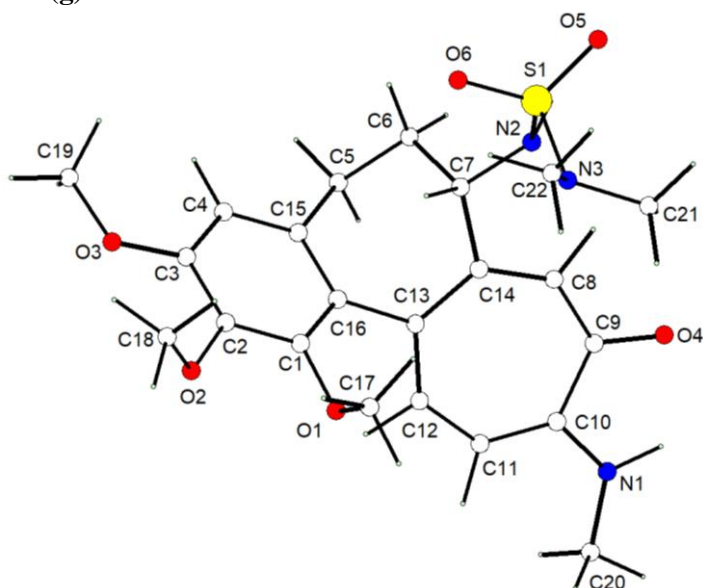

|                 |         |                |         |             |        |
|-----------------|---------|----------------|---------|-------------|--------|
| C1-O1           | 1.375   | C2-O2          | 1.371   | C3-O3       | 1.367  |
| O1-C17          | 1.430   | O2-C18         | 1.434   | O3-C19      | 1.423  |
| C10-N1          | 1.350   | N1-C20         | 1.445   | C9-O4       | 1.253  |
| C7-N2           | 1.472   | N2-S1          | 1.676   | S1-O5       | 1.469  |
| S1-O6           | 1.467   | S1-N3          | 1.695   | N3-C21      | 1.472  |
| N3-C22          | 1.473   | C1-C2          | 1.406   | C2-C3       | 1.410  |
| C3-C4           | 1.398   | C4-C15         | 1.398   | C15-C16     | 1.409  |
| C1-C16          | 1.413   | C15-C5         | 1.512   | C5-C6       | 1.543  |
| C6-C7           | 1.547   | C7-C14         | 1.541   | C14-C13     | 1.434  |
| C13-C16         | 1.501   | C14-C8         | 1.382   | C8-C9       | 1.437  |
| C9-C10          | 1.490   | C10-C11        | 1.392   | C11-C12     | 1.405  |
| C12-C13         | 1.392   |                |         |             |        |
| C1-O1-C17       | 116.30  | C2-O2-C18      | 117.91  | C3-O3-C19   | 118.61 |
| C1-C16-C13      | 119.02  | O1-C1-C2       | 119.33  | O2-C2-C3    | 122.68 |
| O3-C3-C4        | 124.14  | C4-C15-C5      | 120.47  | C15-C5-C6   | 112.02 |
| C5-C6-C7        | 113.28  | C6-C7-C14      | 111.84  | C7-C14-C13  | 115.36 |
| C14-C13-C16     | 119.53  | C14-C8-C9      | 134.69  | C8-C9-C10   | 123.24 |
| C8-C9-O4        | 120.10  | O4-C9-C10      | 116.66  | C9-C10-N1   | 111.44 |
| C10-N1-C20      | 126.27  | N1-C10-C11     | 122.13  | C10-C11-C12 | 130.59 |
| C11-C12-C13     | 132.65  | C12-C13-C14    | 124.47  | C12-C13-C16 | 115.98 |
| C6-C7-N2        | 109.70  | C7-N2-S1       | 119.57  | N2-S1-O5    | 104.55 |
| N2-S1-O6        | 112.09  | N2-S1-N3       | 100.10  | S1-N3-C21   | 114.05 |
| S1-N3-C22       | 113.93  | C21-N3-C22     | 113.26  |             |        |
| C1-C16-C13-C12  | 54.48   | C17-O1-C1-C2   | -74.76  |             |        |
| C18-O2-C2-C3    | -59.62  | C19-O3-C3-C4   | 0.66    |             |        |
| O1-C1-C2-O2     | -0.48   | O2-C2-C3-O3    | 1.63    |             |        |
| C11-C10-N1-C20  | 0.17    | N1-C10-C9-O4   | -0.06   |             |        |
| C1-C16-C13-C14  | -126.94 | C3-C4-C15-C5   | -178.79 |             |        |
| C4-C15-C5-C6    | 108.80  | C15-C5-C6-C7   | 42.15   |             |        |
| C5-C6-C7-N2     | 173.82  | C5-C6-C7-C14   | 46.87   |             |        |
| C6-C7-C14-C13   | -75.71  | C7-C14-C13-C16 | 1.04    |             |        |
| C14-C13-C16-C15 | 54.68   | C14-C7-N2-S1   | 130.07  |             |        |
| C7-N2-S1-O5     | -160.19 | C7-N2-S1-O6    | -28.79  |             |        |
| C7-N2-S1-N3     | 82.85   | N2-S1-N3-C21   | 68.32   |             |        |
| N2-S1-N3-C22    | -159.52 |                |         |             |        |

(h) 19

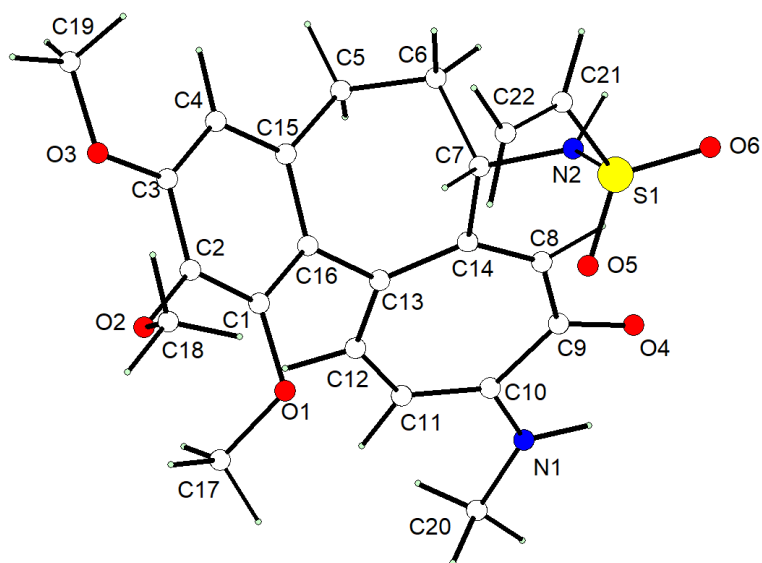

|                 |        |             |                |             |         |
|-----------------|--------|-------------|----------------|-------------|---------|
| C1-O1           | 1.371  | C2-O2       | 1.376          | C3-O3       | 1.366   |
| O1-C17          | 1.434  | O2-C18      | 1.434          | O3-C19      | 1.422   |
| C10-N1          | 1.350  | N1-C20      | 1.445          | C9-O4       | 1.251   |
| C7-N2           | 1.464  | N2-S1       | 1.669          | S1-O5       | 1.463   |
| S1-O6           | 1.466  | C1-C2       | 1.405          | C2-C3       | 1.409   |
| C3-C4           | 1.398  | C4-C15      | 1.400          | C15-C16     | 1.408   |
| C1-C16          | 1.416  | C15-C5      | 1.512          | C5-C6       | 1.544   |
| C6-C7           | 1.548  | C7-C14      | 1.544          | C14-C13     | 1.434   |
| C13-C16         | 1.501  | C14-C8      | 1.380          | C8-C9       | 1.438   |
| C9-C10          | 1.491  | C10-C11     | 1.391          | C11-C12     | 1.406   |
| C12-C13         | 1.390  |             |                |             |         |
| C1-O1-C17       | 118.62 | C2-O2-C18   | 115.06         | C3-O3-C19   | 118.45  |
| C1-C16-C13      | 119.10 | O1-C1-C2    | 120.82         | O2-C2-C3    | 120.34  |
| O3-C3-C4        | 124.65 | C4-C15-C5   | 120.35         | C15-C5-C6   | 111.79  |
| C5-C6-C7        | 113.43 | C6-C7-C14   | 111.45         | C7-C14-C13  | 115.27  |
| C14-C13-C16     | 119.50 | C14-C8-C9   | 134.49         | C8-C9-C10   | 123.26  |
| C8-C9-O4        | 120.15 | O4-C9-C10   | 116.59         | C9-C10-N1   | 111.38  |
| C10-N1-C20      | 126.29 | N1-C10-C11  | 122.17         | C10-C11-C12 | 130.47  |
| C11-C12-C13     | 132.81 | C12-C13-C14 | 124.33         | C12-C13-C16 | 116.15  |
| C6-C7-N2        | 108.85 | C7-N2-S1    | 122.96         | N2-S1-O5    | 107.60  |
| N2-S1-O6        | 104.90 | N2-S1-C21   | 105.83         | S1-C21-C22  | 121.75  |
| C1-C16-C13-C12  |        | 55.98       | C17-O1-C1-C2   |             | 59.22   |
| C18-O2-C2-C3    |        | -77.18      | C19-O3-C3-C4   |             | 3.10    |
| O1-C1-C2-O2     |        | -4.56       | O2-C2-C3-O3    |             | 0.04    |
| C11-C10-N1-C20  |        | -1.61       | N1-C10-C9-O4   |             | 1.44    |
| C1-C16-C13-C14  |        | -125.41     | C3-C4-C15-C5   |             | -177.15 |
| C4-C15-C5-C6    |        | 108.09      | C15-C5-C6-C7   |             | 42.68   |
| C5-C6-C7-N2     |        | 173.52      | C5-C6-C7-C14   |             | 46.61   |
| C6-C7-C14-C13   |        | -75.46      | C7-C14-C13-C16 |             | 0.65    |
| C14-C13-C16-C15 |        | 55.49       | C14-C7-N2-S1   |             | 108.99  |
| C7-N2-S1-O5     |        | 46.52       | C7-N2-S1-O6    |             | 179.05  |
| C7-N2-S1-C21    |        | -68.32      | N2-S1-C21-C22  |             | 112.70  |
| O5-S1-C21-C22   |        | -2.12       | O6-S1-C21-C22  |             | -135.94 |

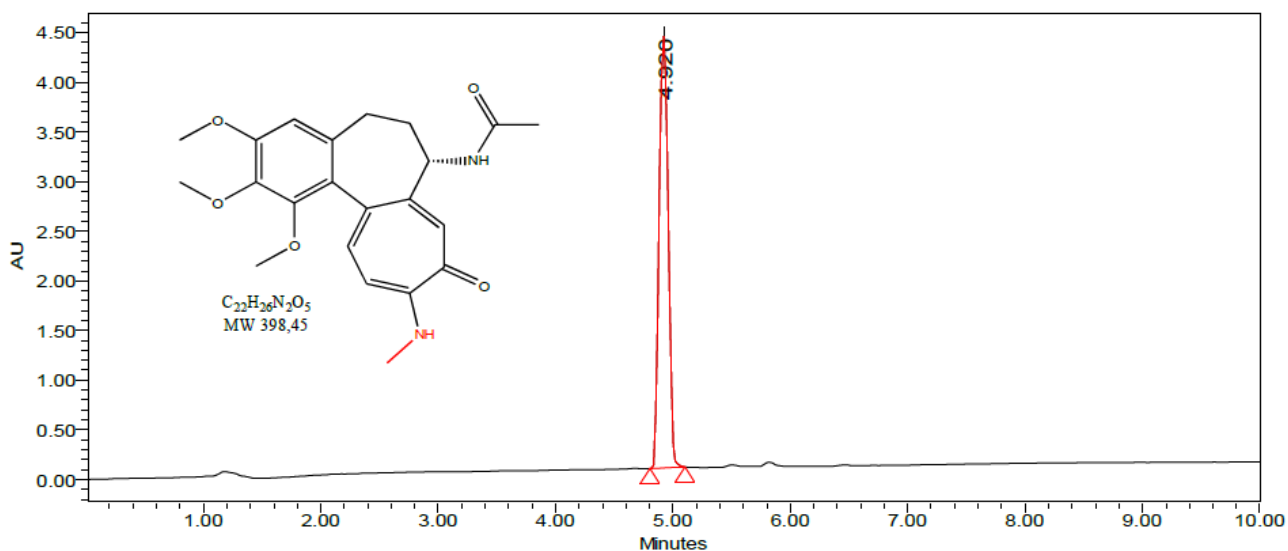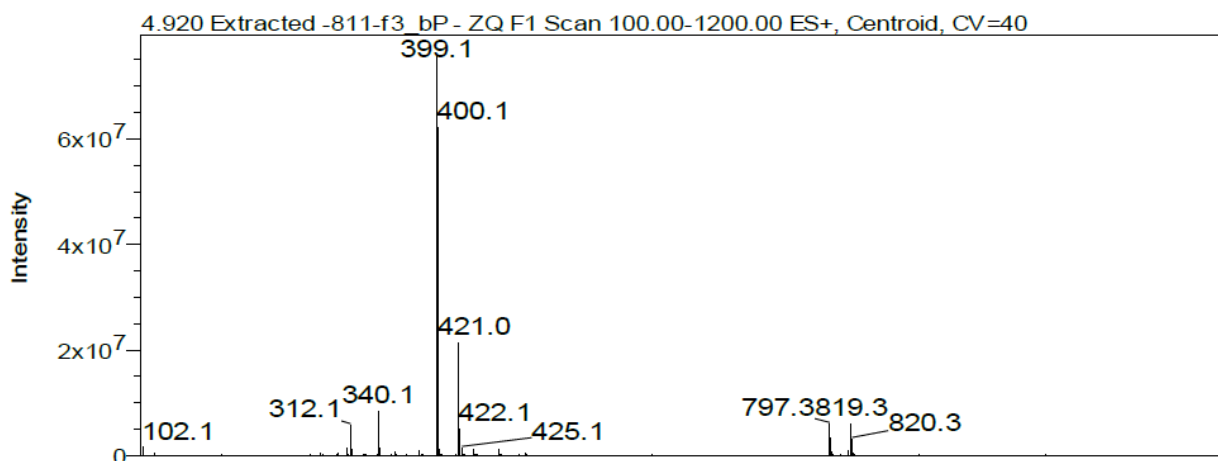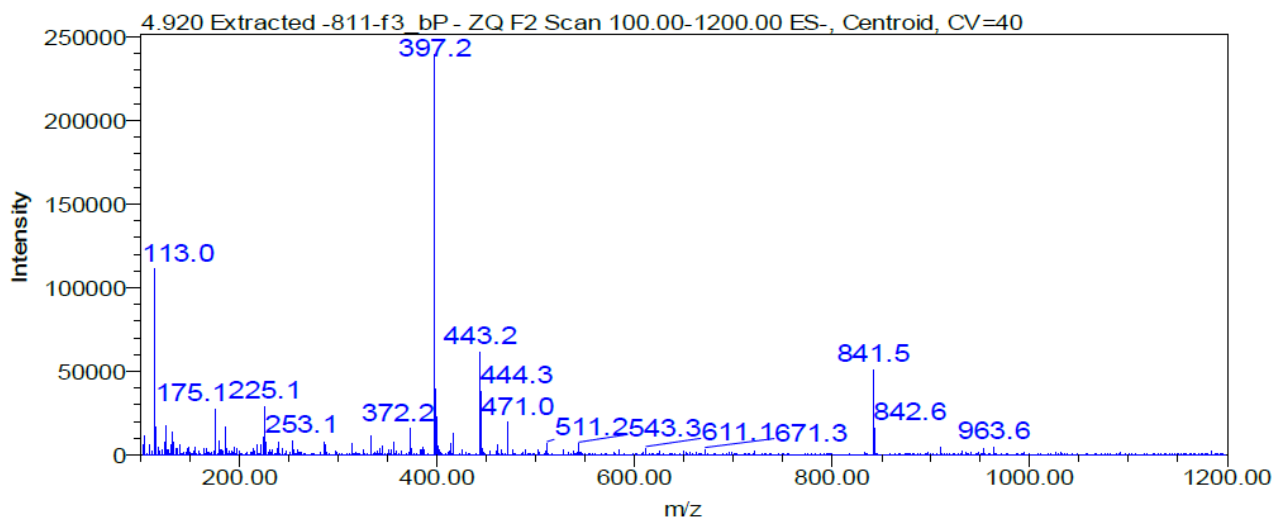

**Figure S1.** The LC-MS chromatogram and mass spectra of **2**.

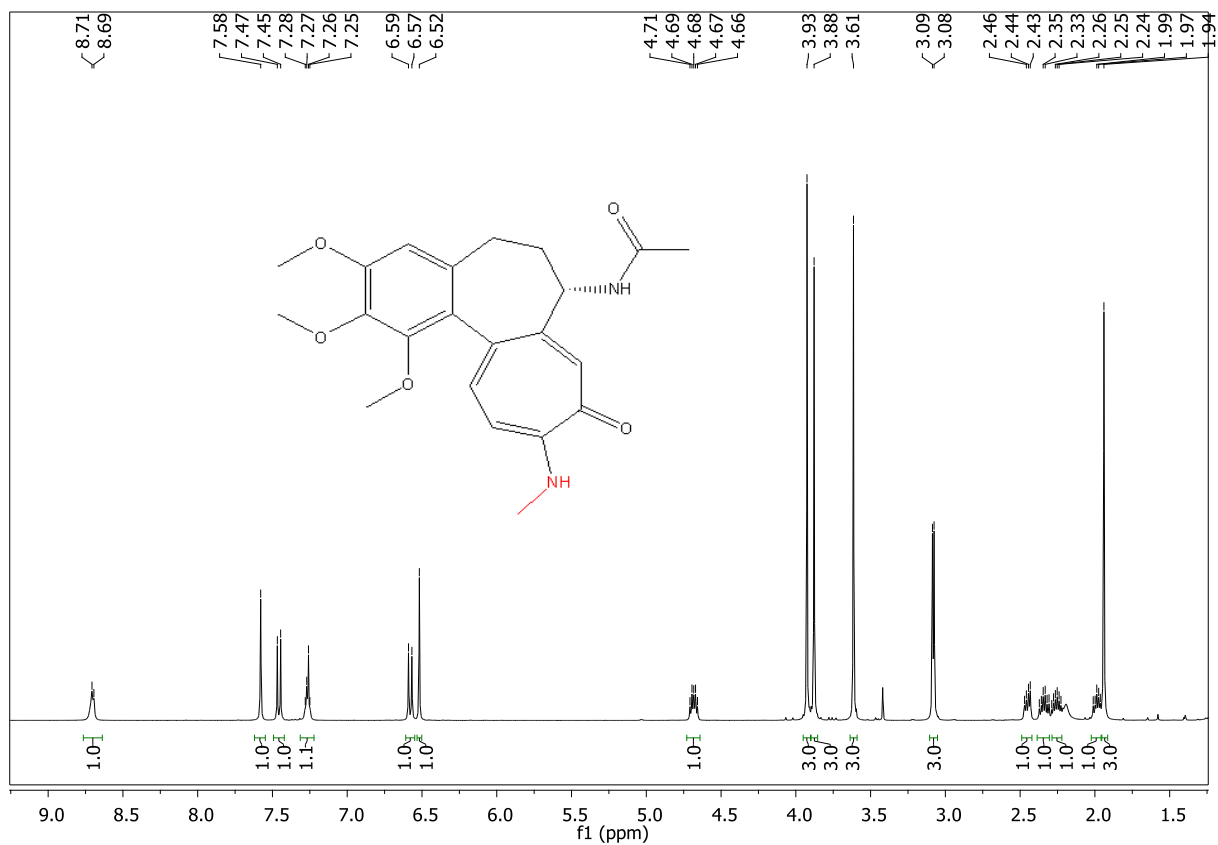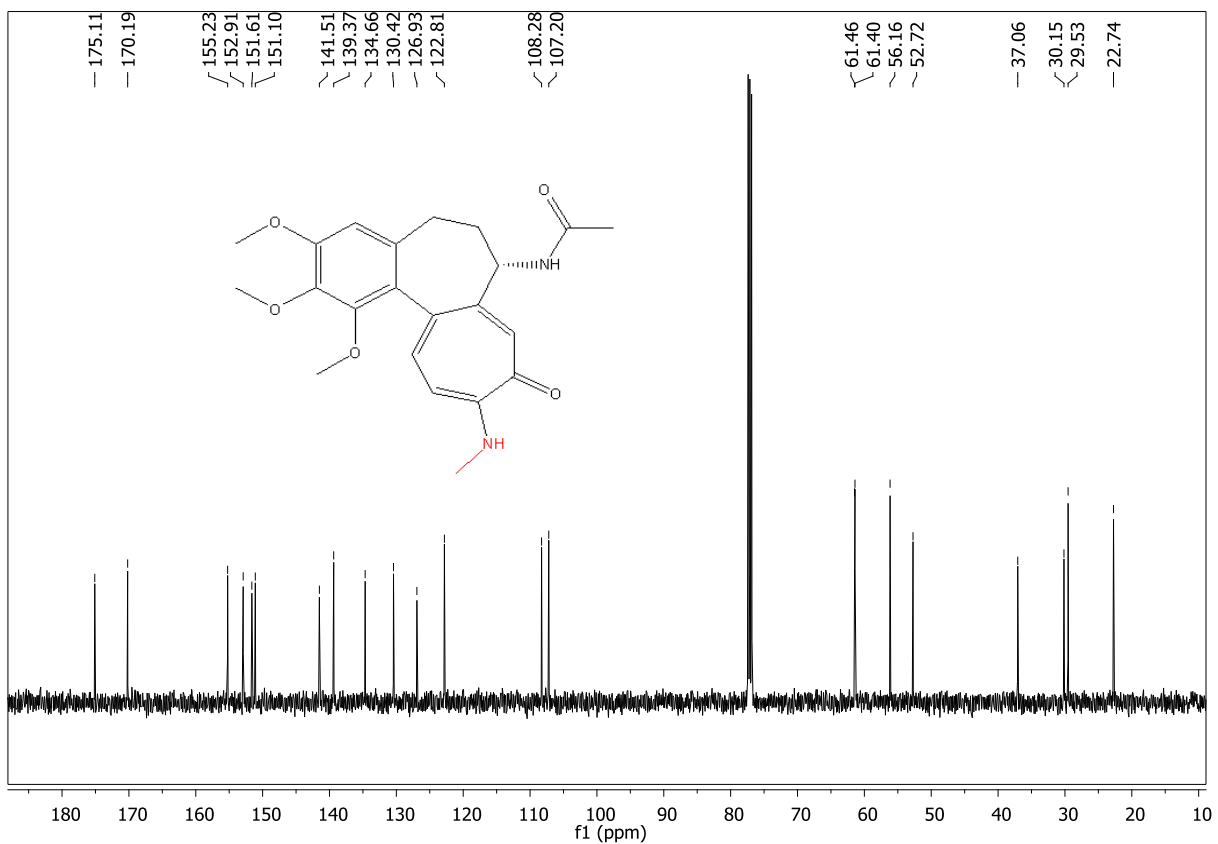

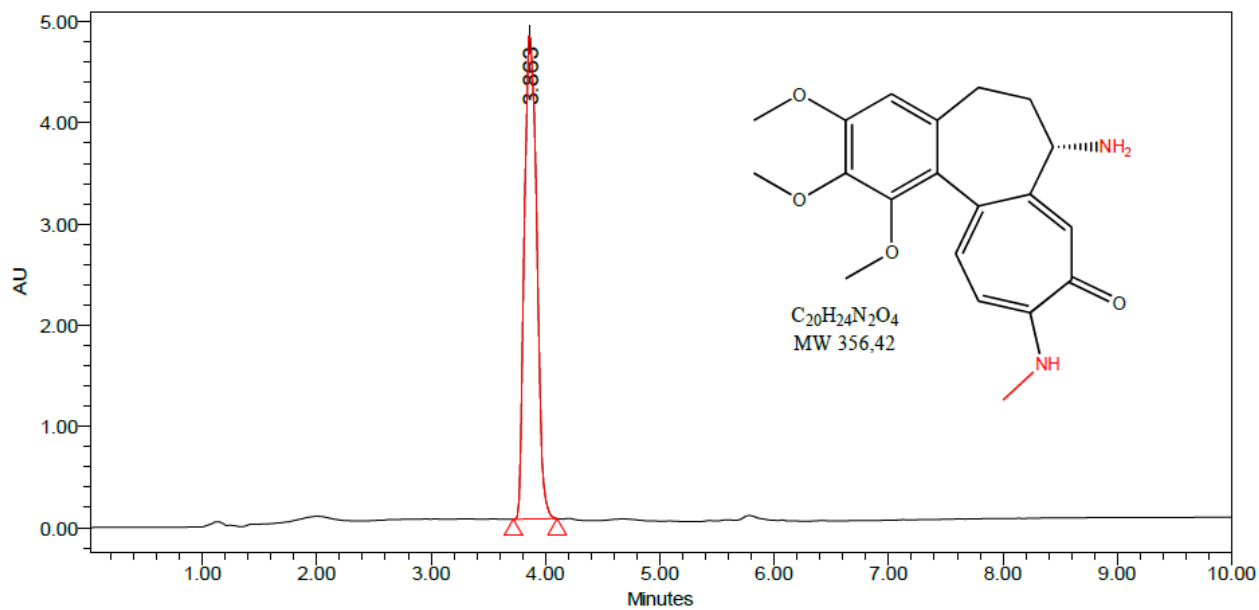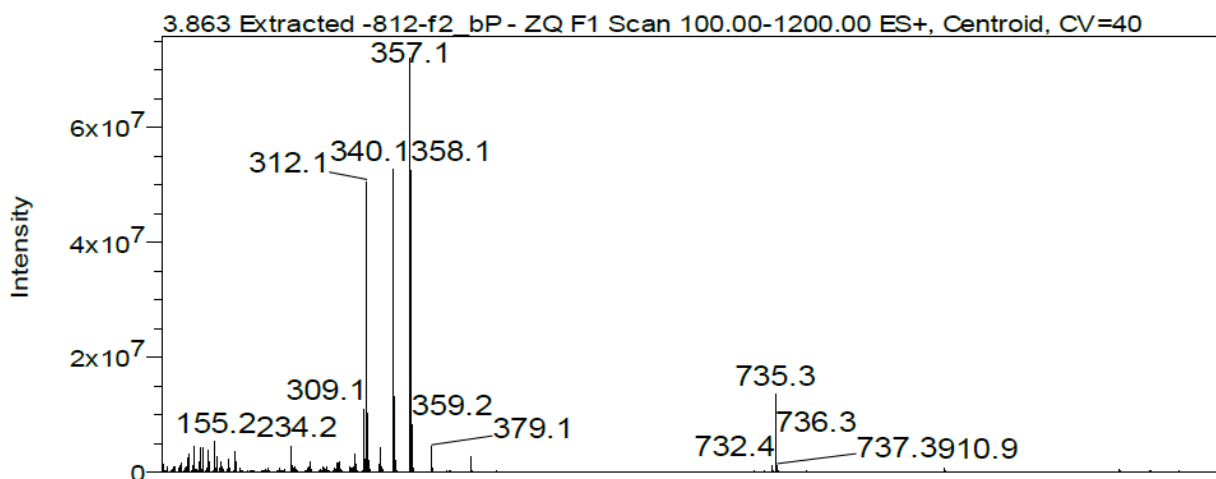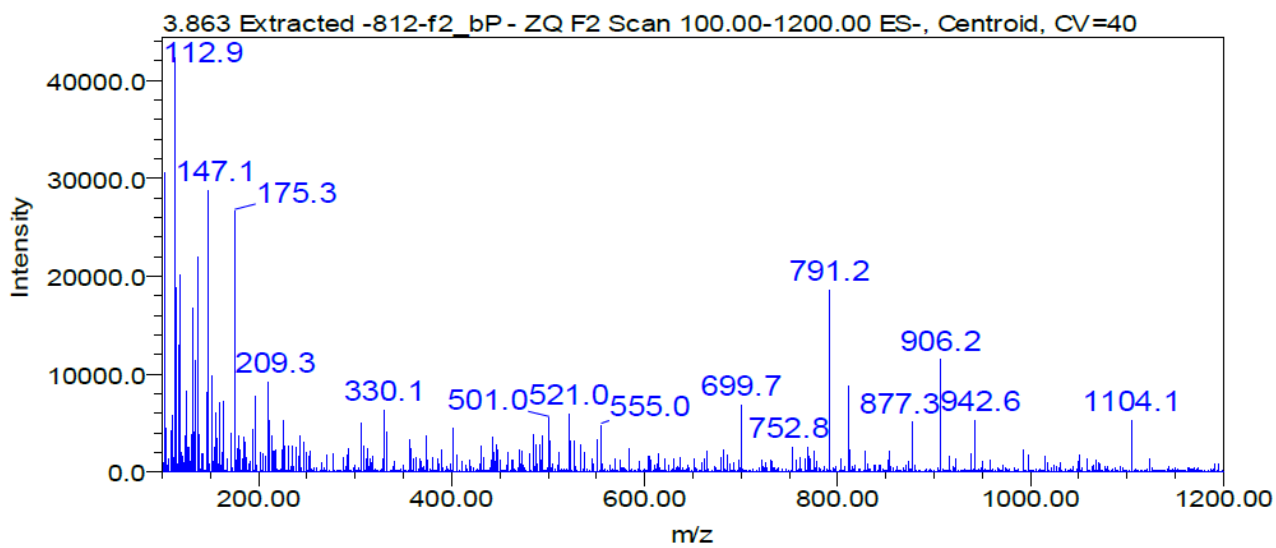

**Figure S4.** The LC-MS chromatogram and mass spectra of **3**.

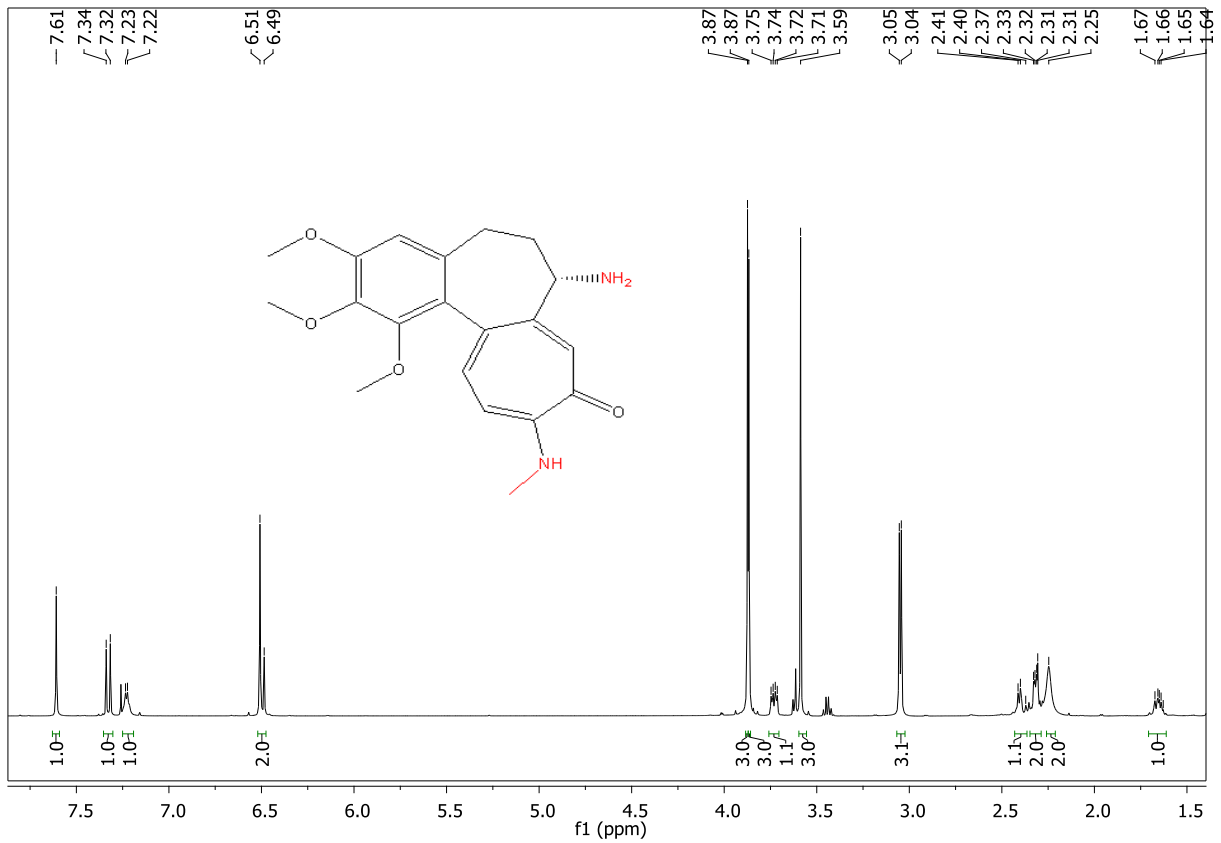

Figure S5. The <sup>1</sup>H NMR spectrum of **3** in CDCl<sub>3</sub>.

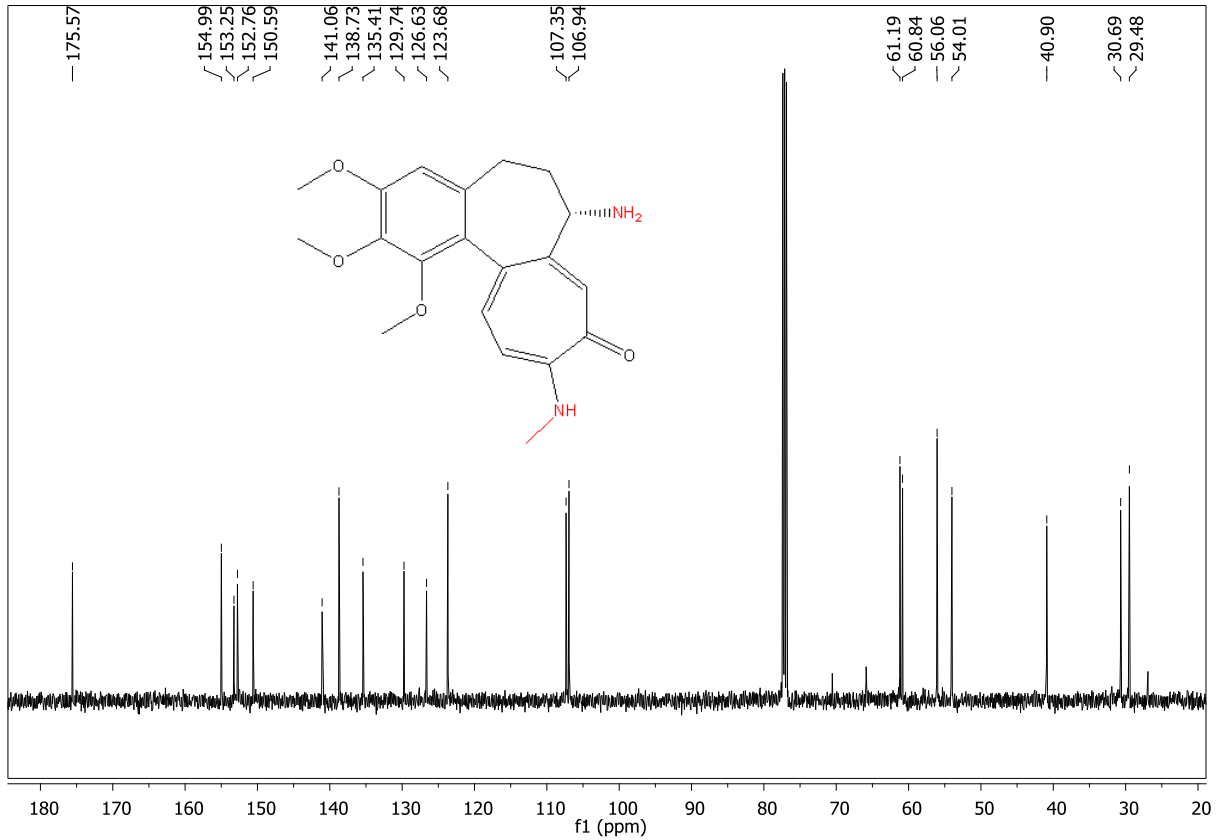

Figure S6. The <sup>13</sup>C NMR spectrum of **3** in CDCl<sub>3</sub>.



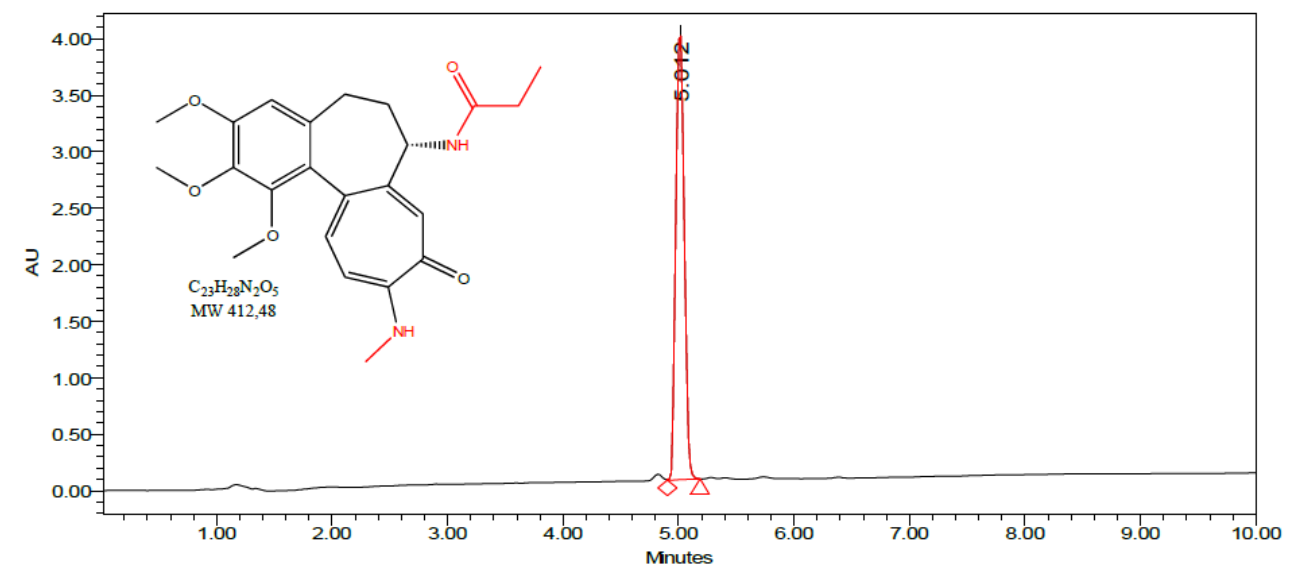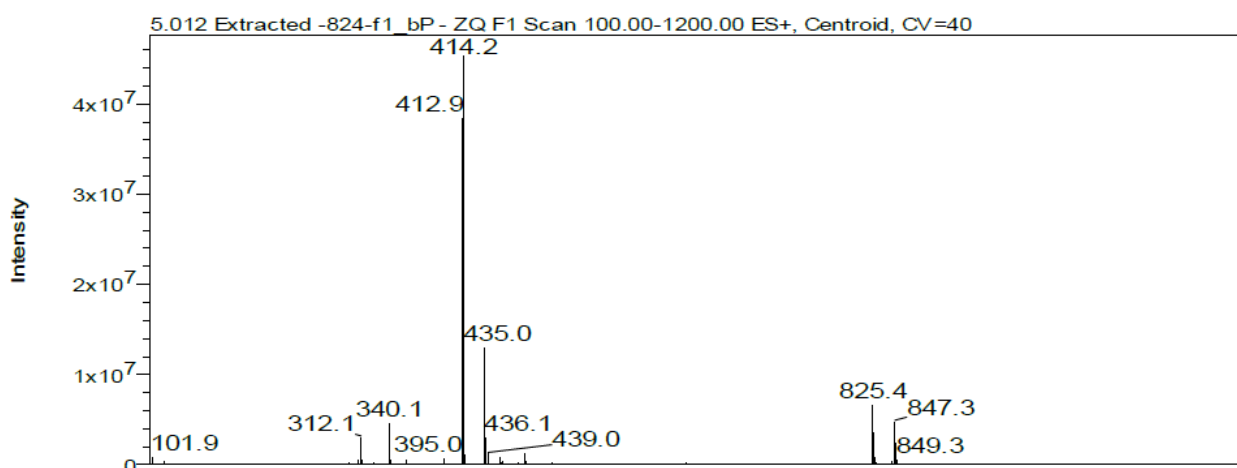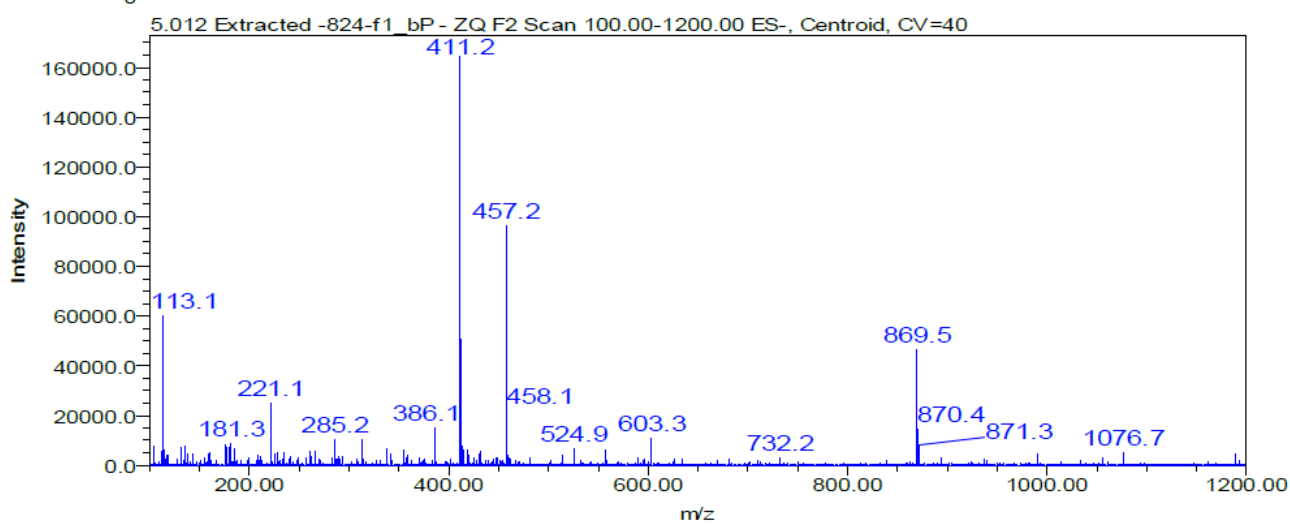

**Figure S7.** The LC-MS chromatogram and mass spectra of **4**.

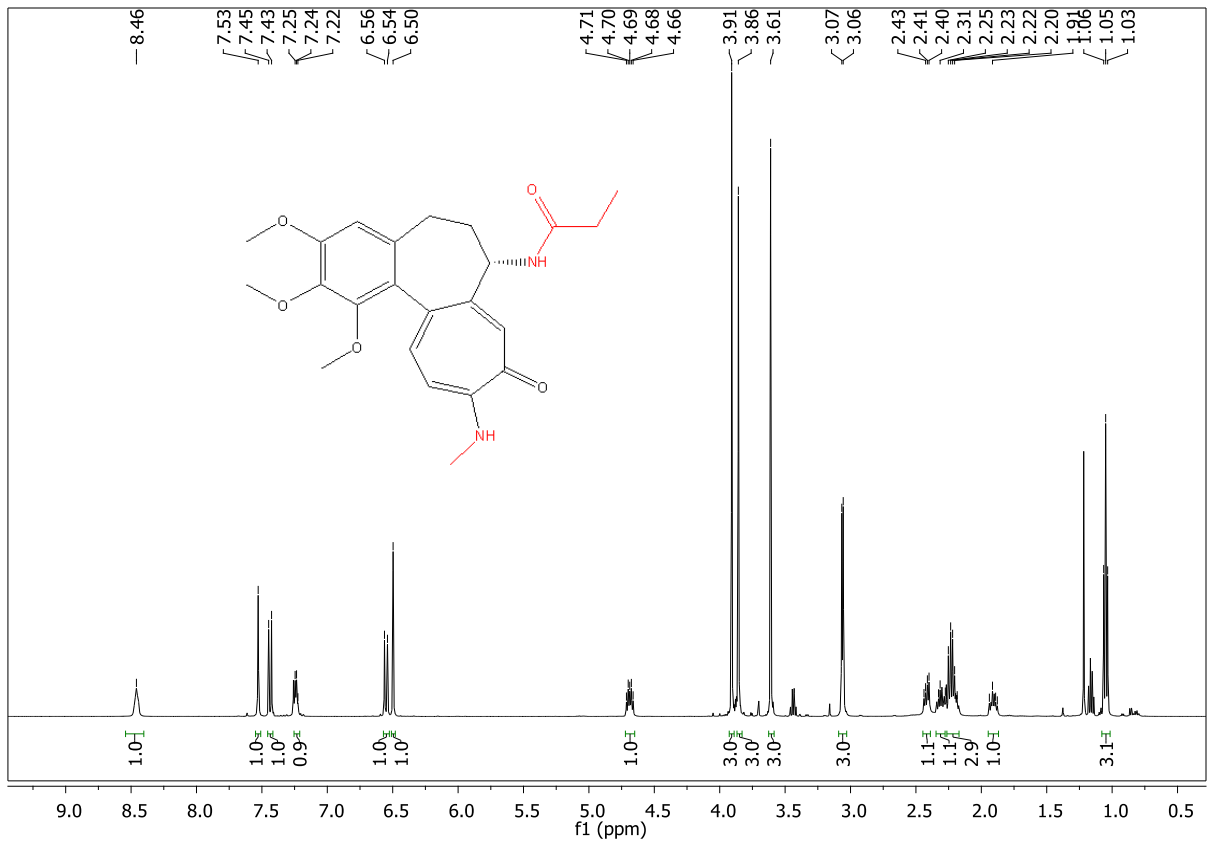

**Figure S8.** The  $^1\text{H}$  NMR spectrum of **4** in  $\text{CDCl}_3$ .

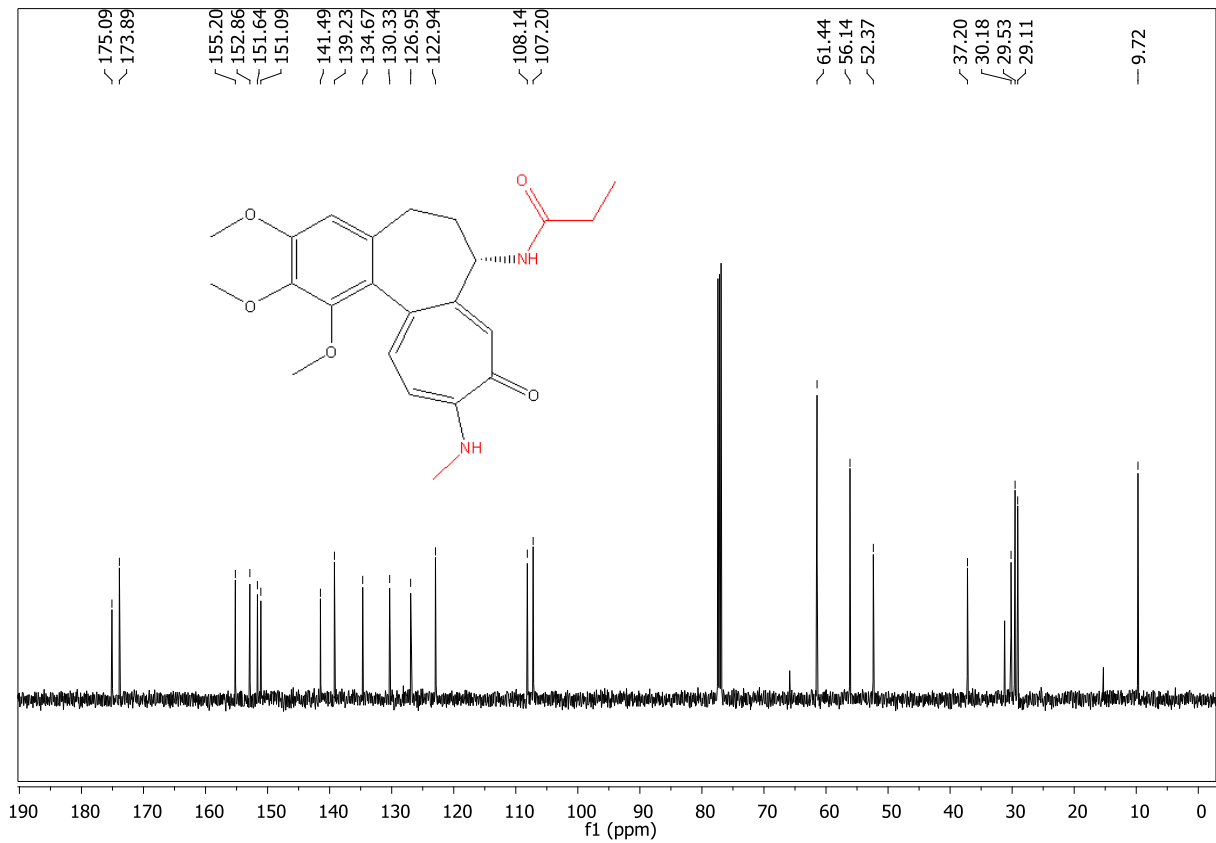

**Figure S9.** The  $^{13}\text{C}$  NMR spectrum of **4** in  $\text{CDCl}_3$ .

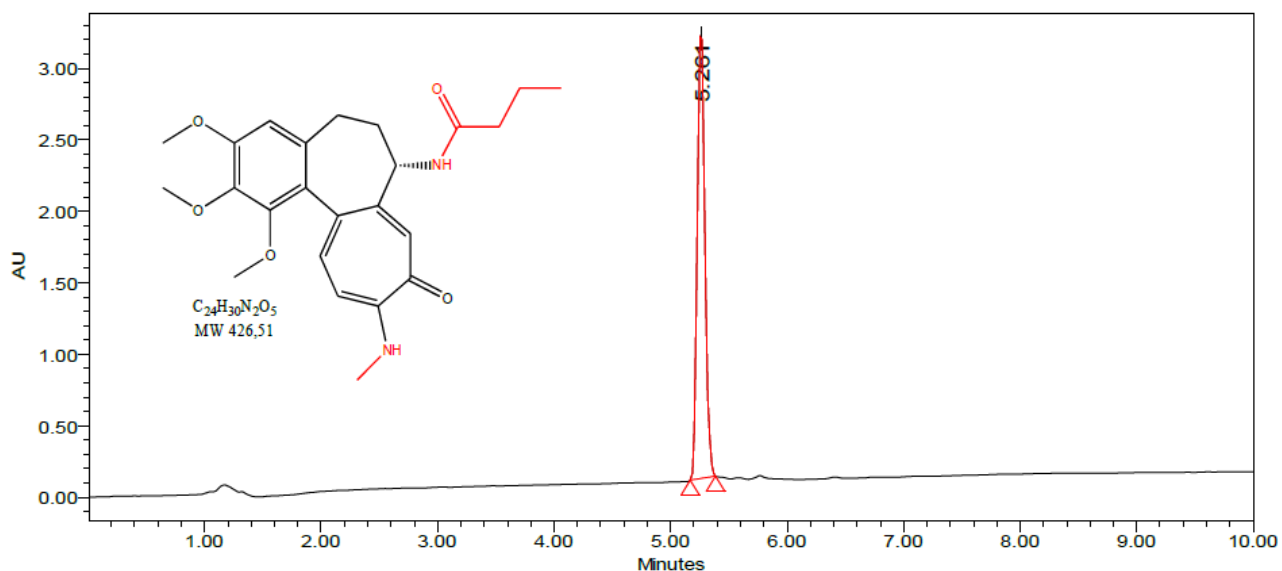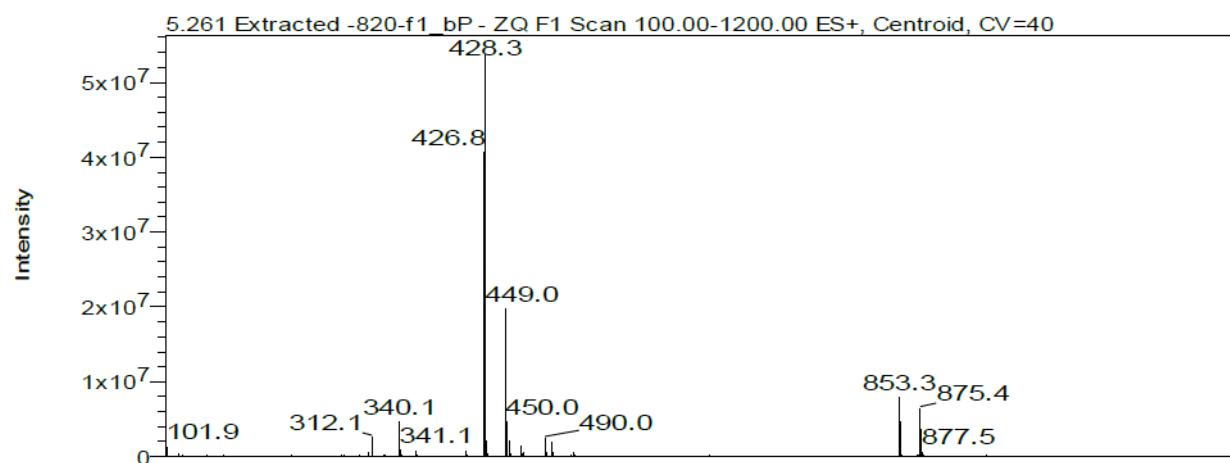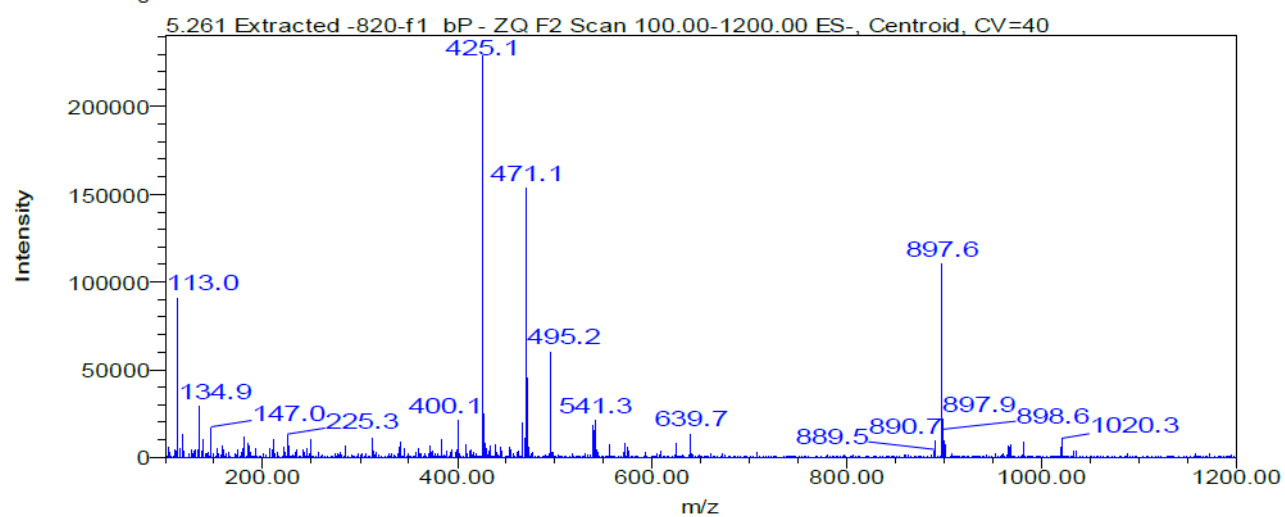

**Figure S10.** The LC-MS chromatogram and mass spectra of **5**.

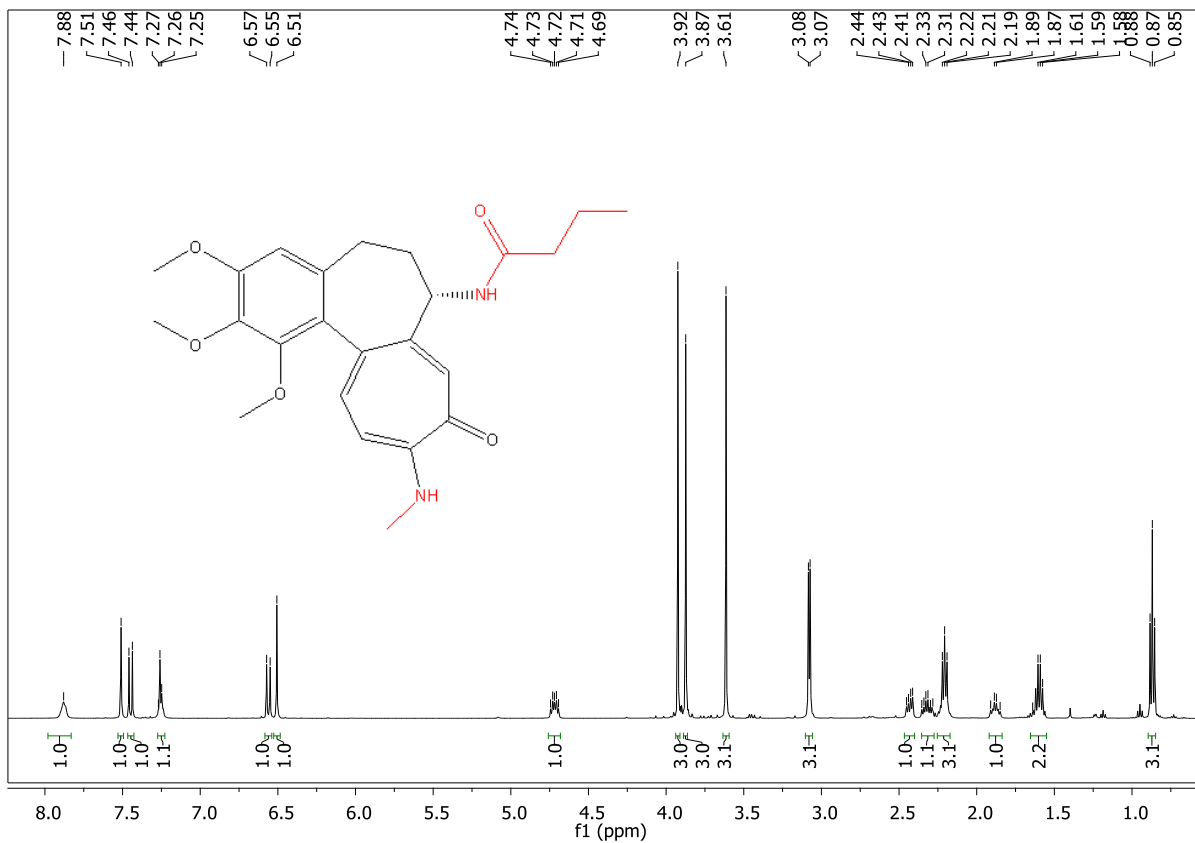

Figure S11. The <sup>1</sup>H NMR spectrum of **5** in CDCl<sub>3</sub>.

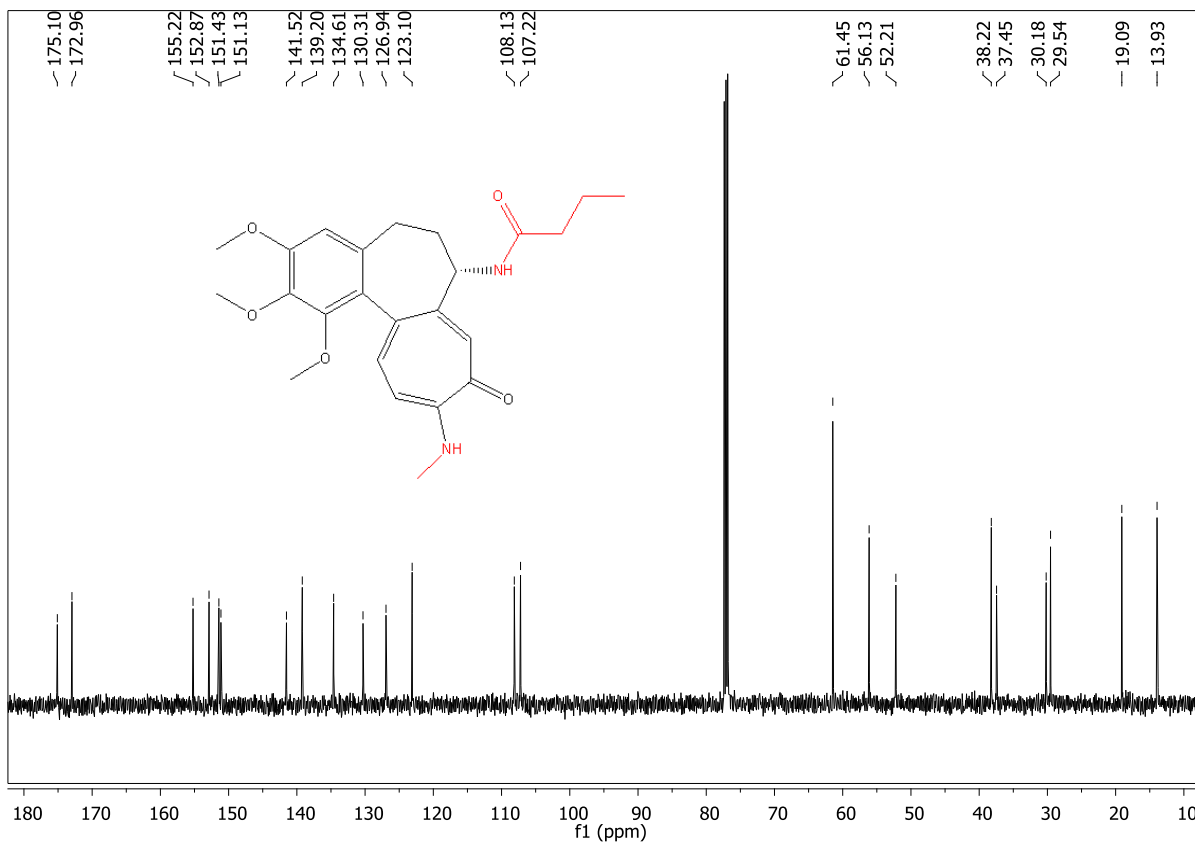

Figure S12. The <sup>13</sup>C NMR spectrum of **5** in CDCl<sub>3</sub>.

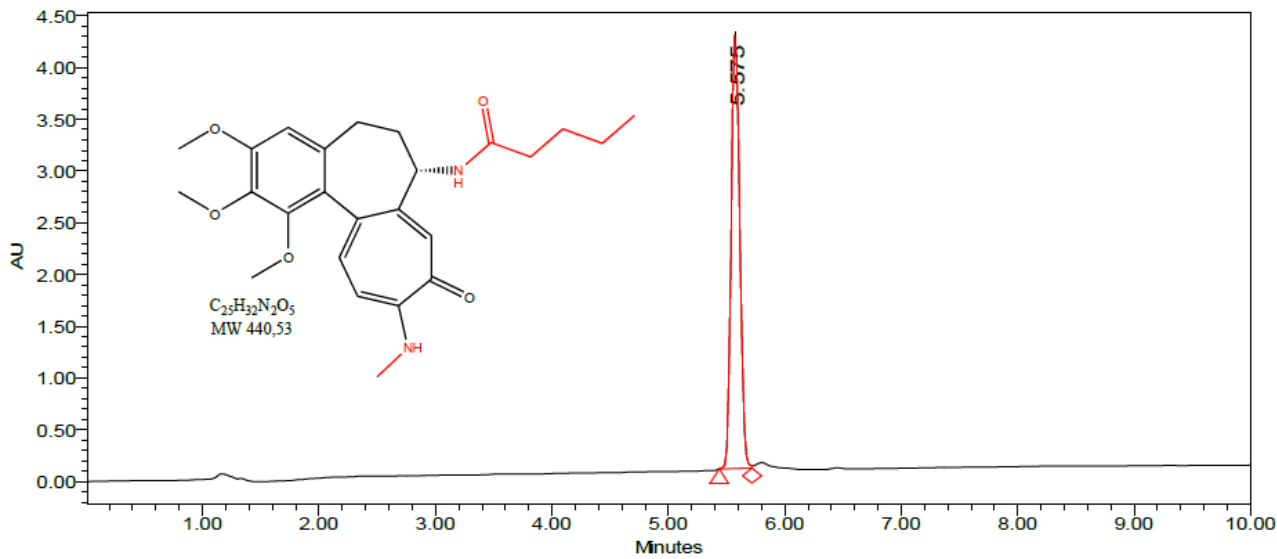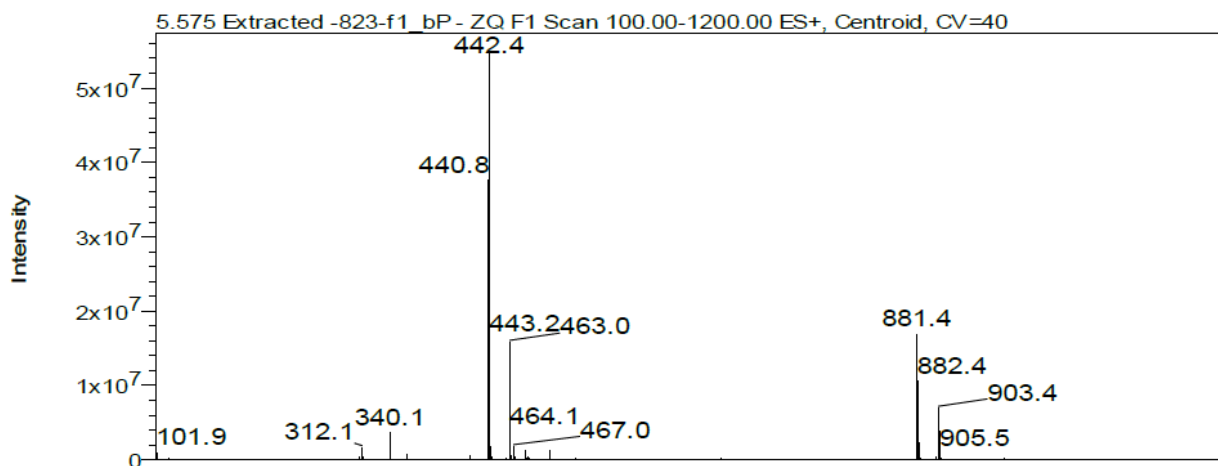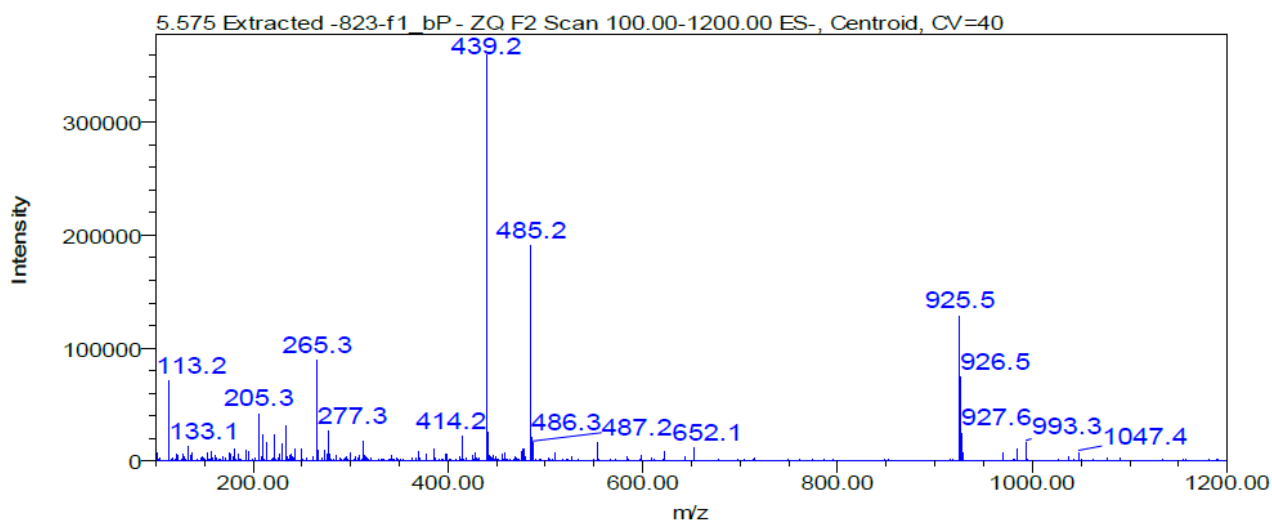

**Figure S13.** The LC-MS chromatogram and mass spectra of **6**.

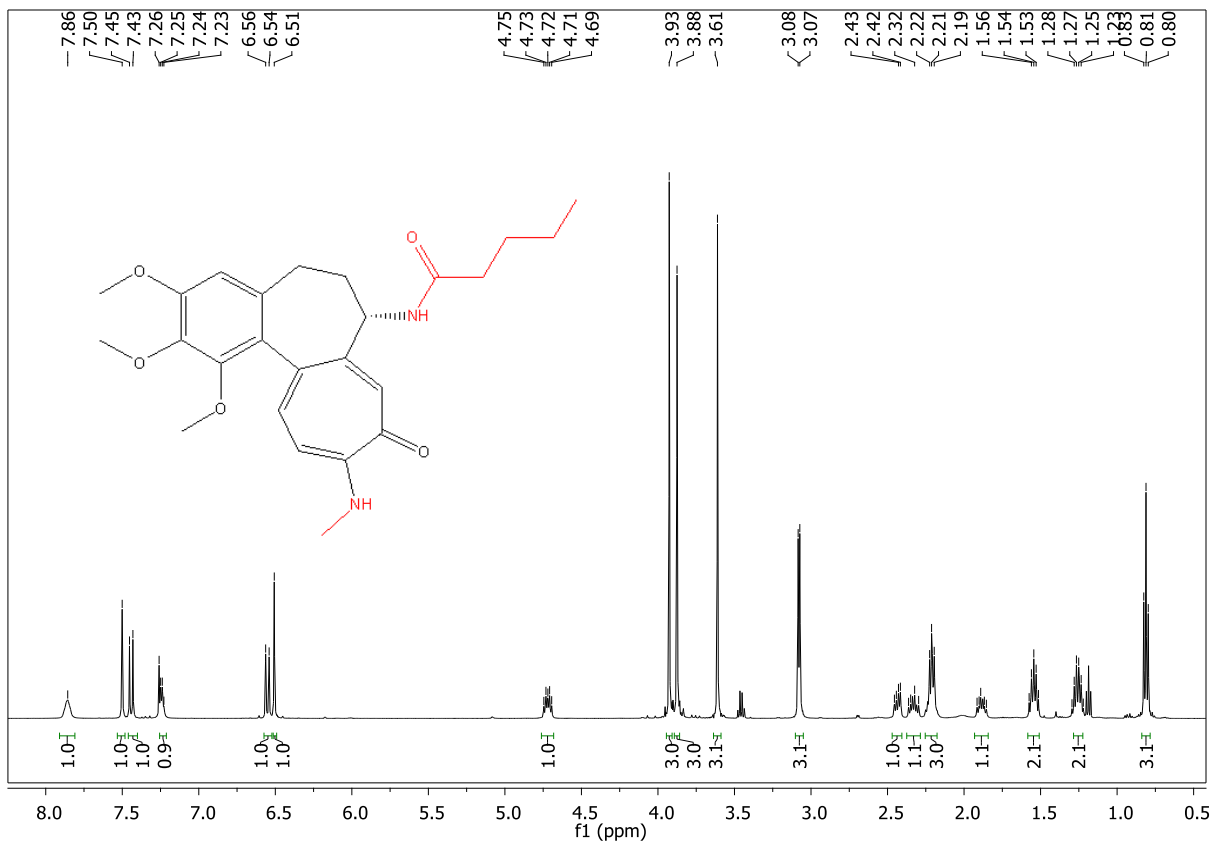

**Figure S14.** The  $^1\text{H}$  NMR spectrum of **6** in  $\text{CDCl}_3$ .

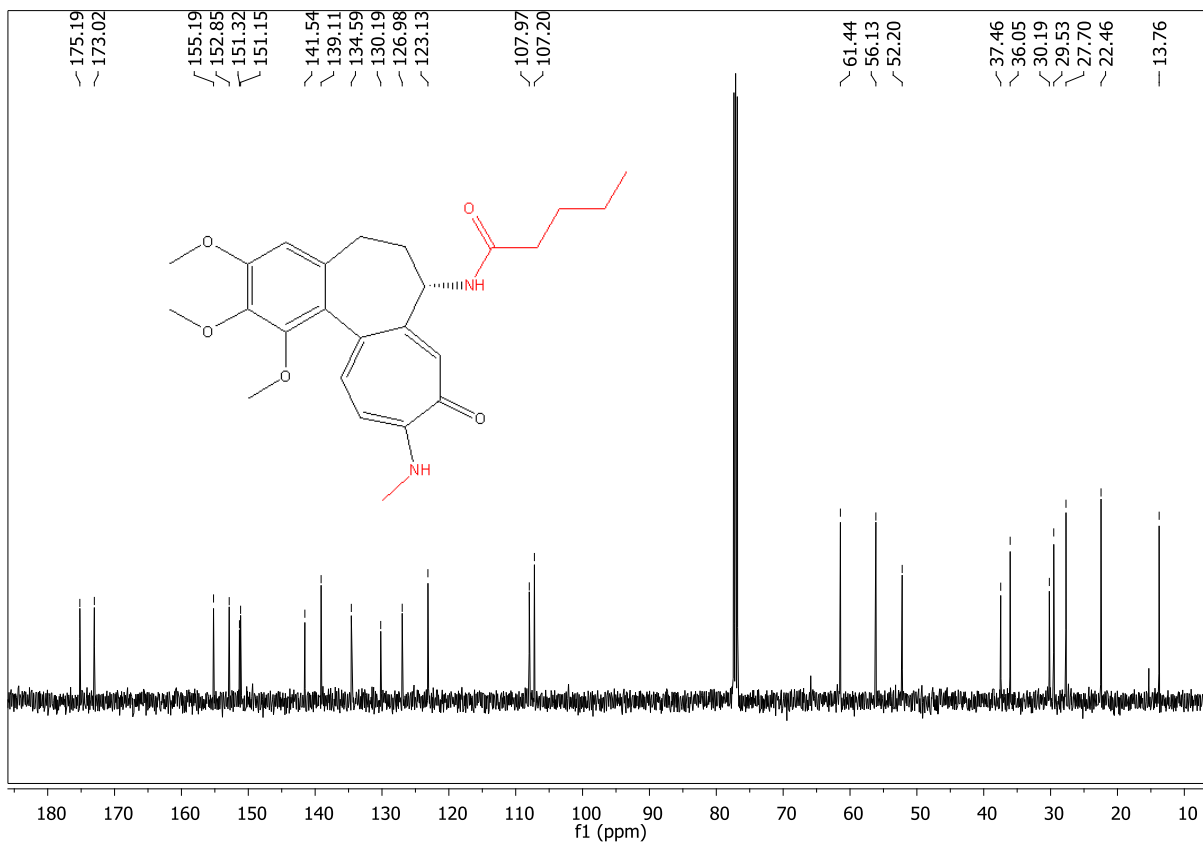

**Figure S15.** The  $^{13}\text{C}$  NMR spectrum of **6** in  $\text{CDCl}_3$ .

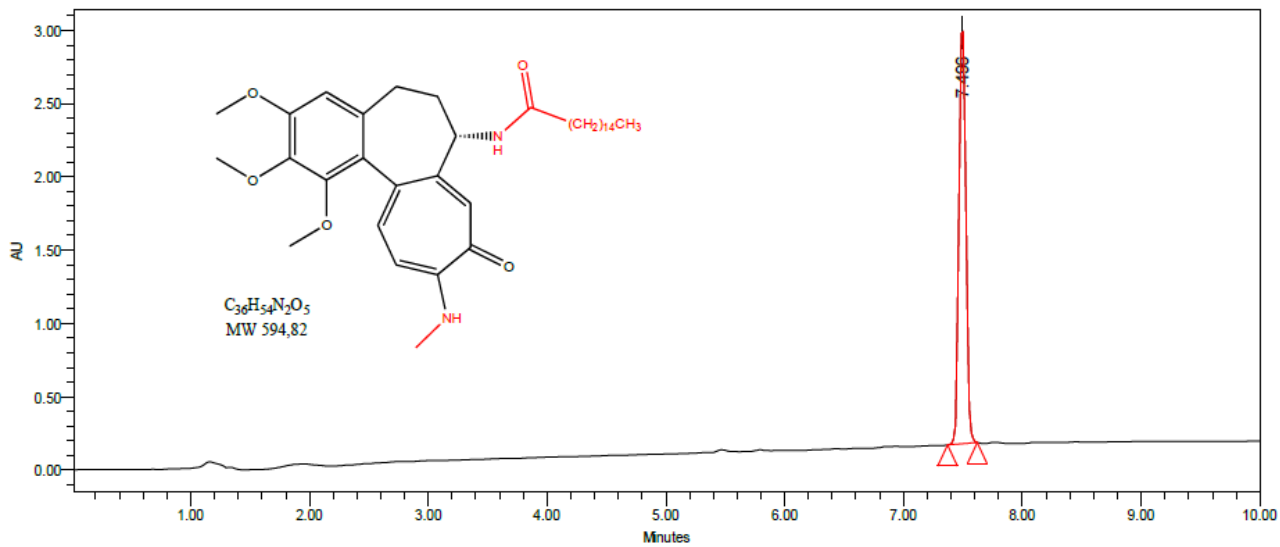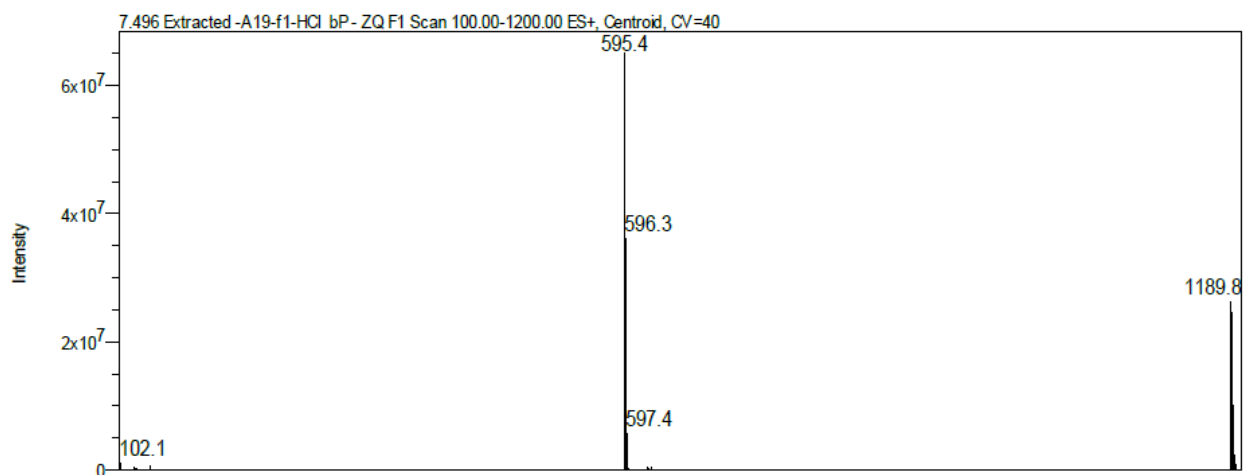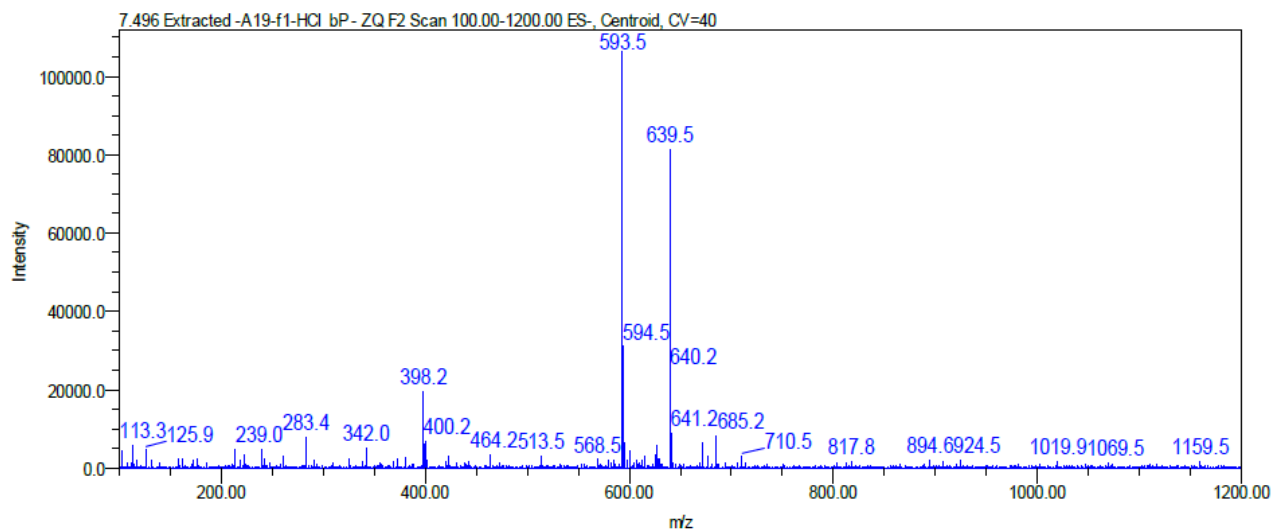

**Figure S16.** The LC-MS chromatogram and mass spectra of **7**.

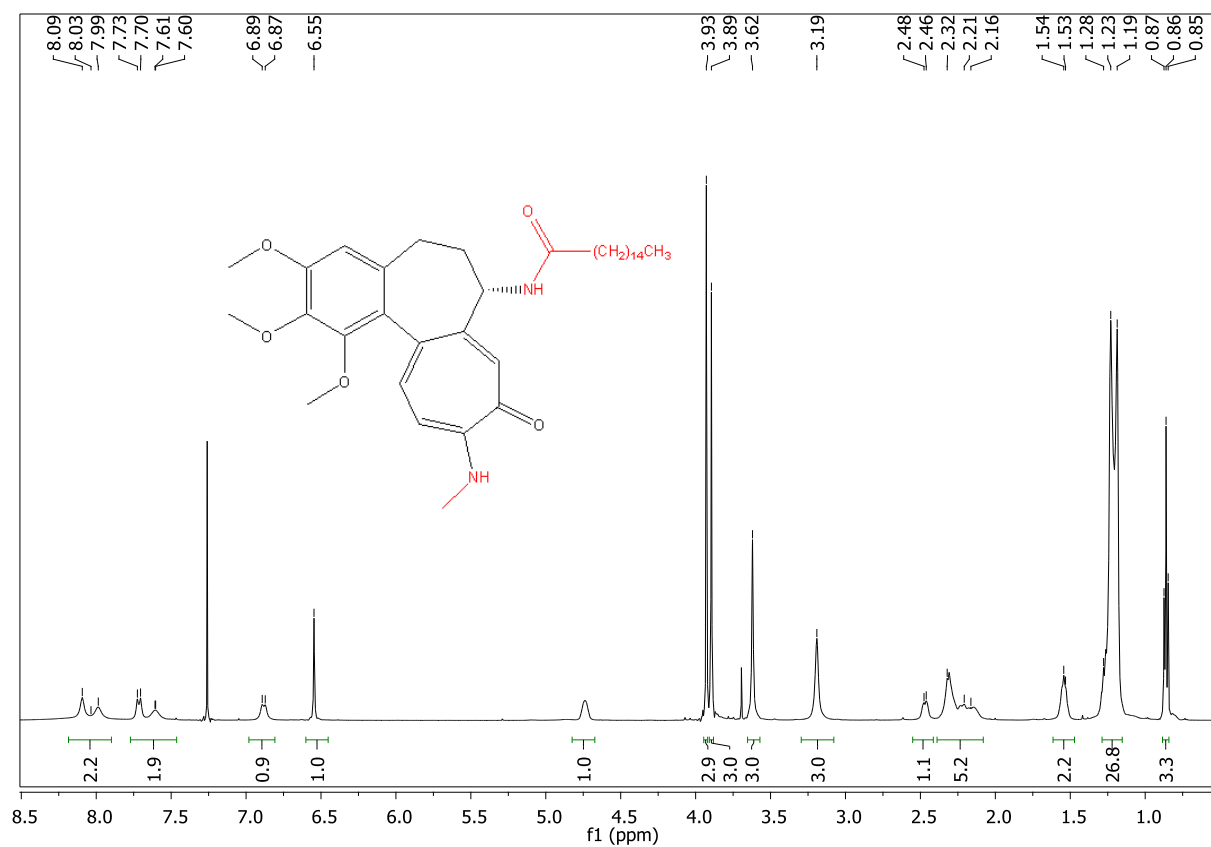

Figure S17. The  $^1\text{H}$  NMR spectrum of **7** in  $\text{CDCl}_3$ .

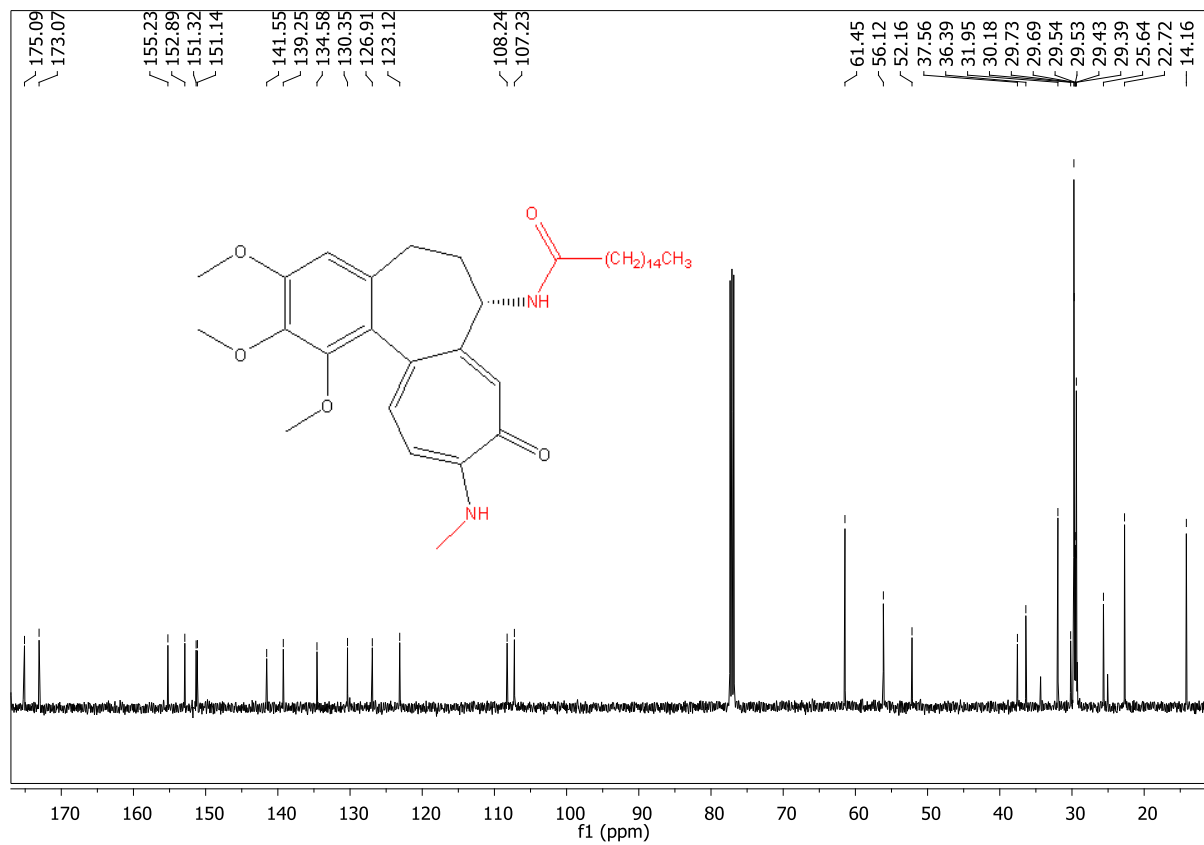

Figure S18. The  $^{13}\text{C}$  NMR spectrum of **7** in  $\text{CDCl}_3$ .



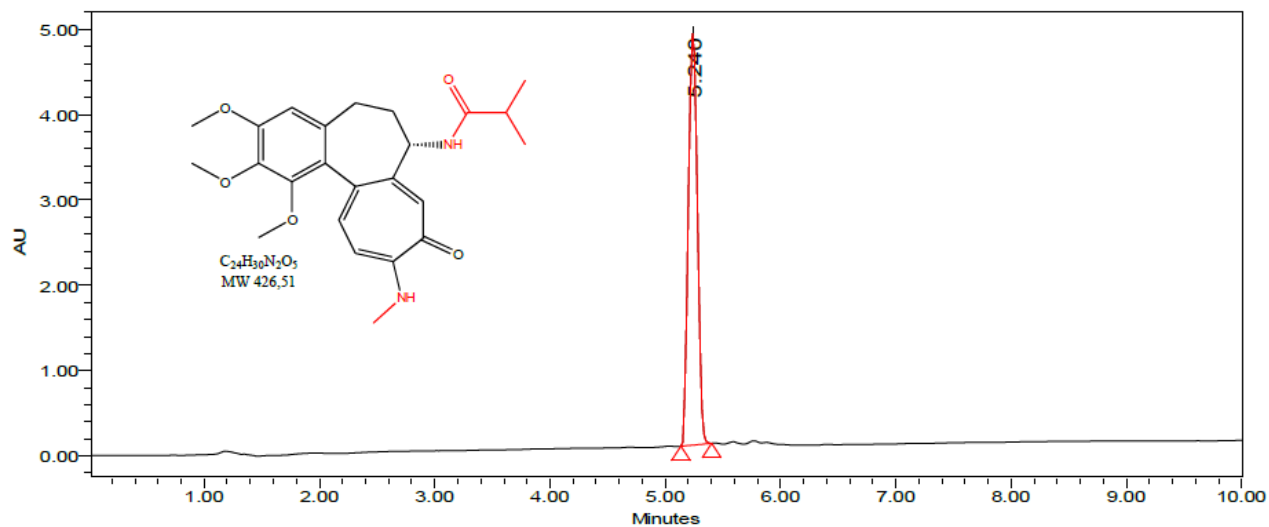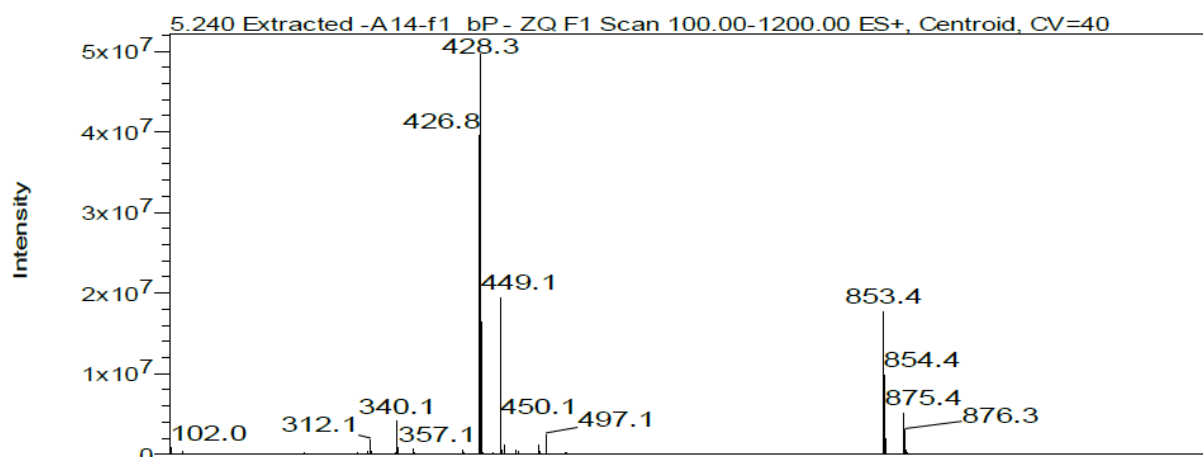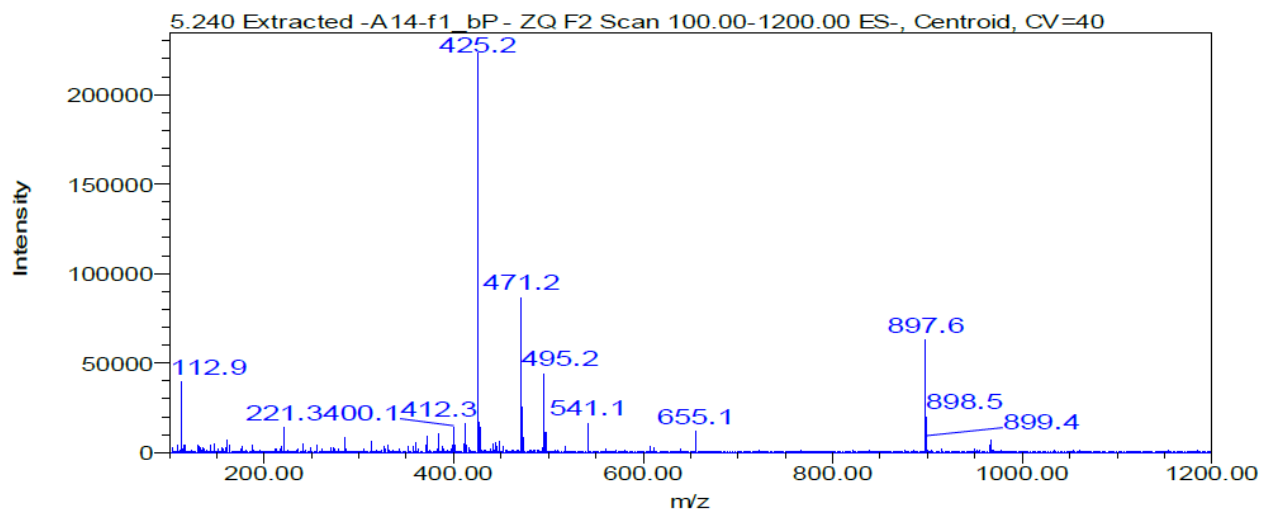

Figure S19. The LC-MS chromatogram and mass spectra of 8.

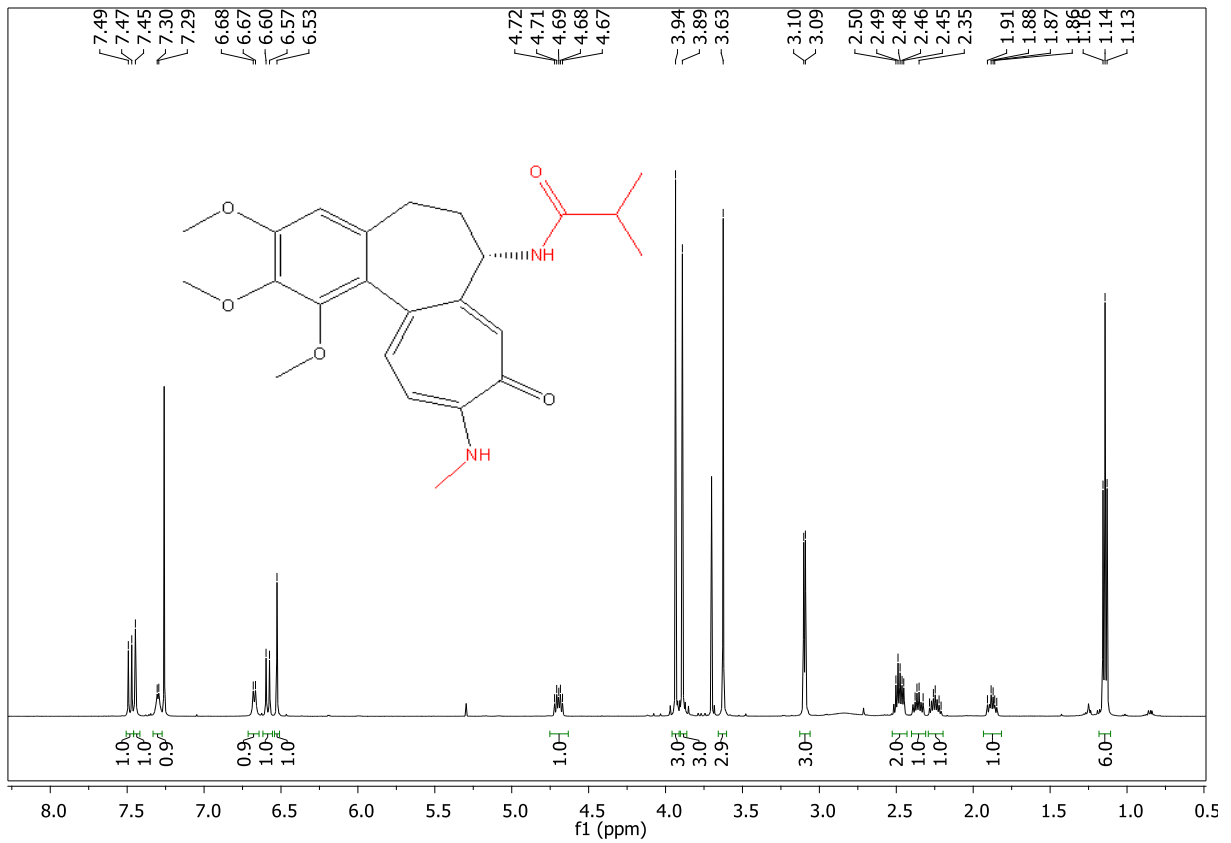

Figure S20. The <sup>1</sup>H NMR spectrum of **8** in CDCl<sub>3</sub>.

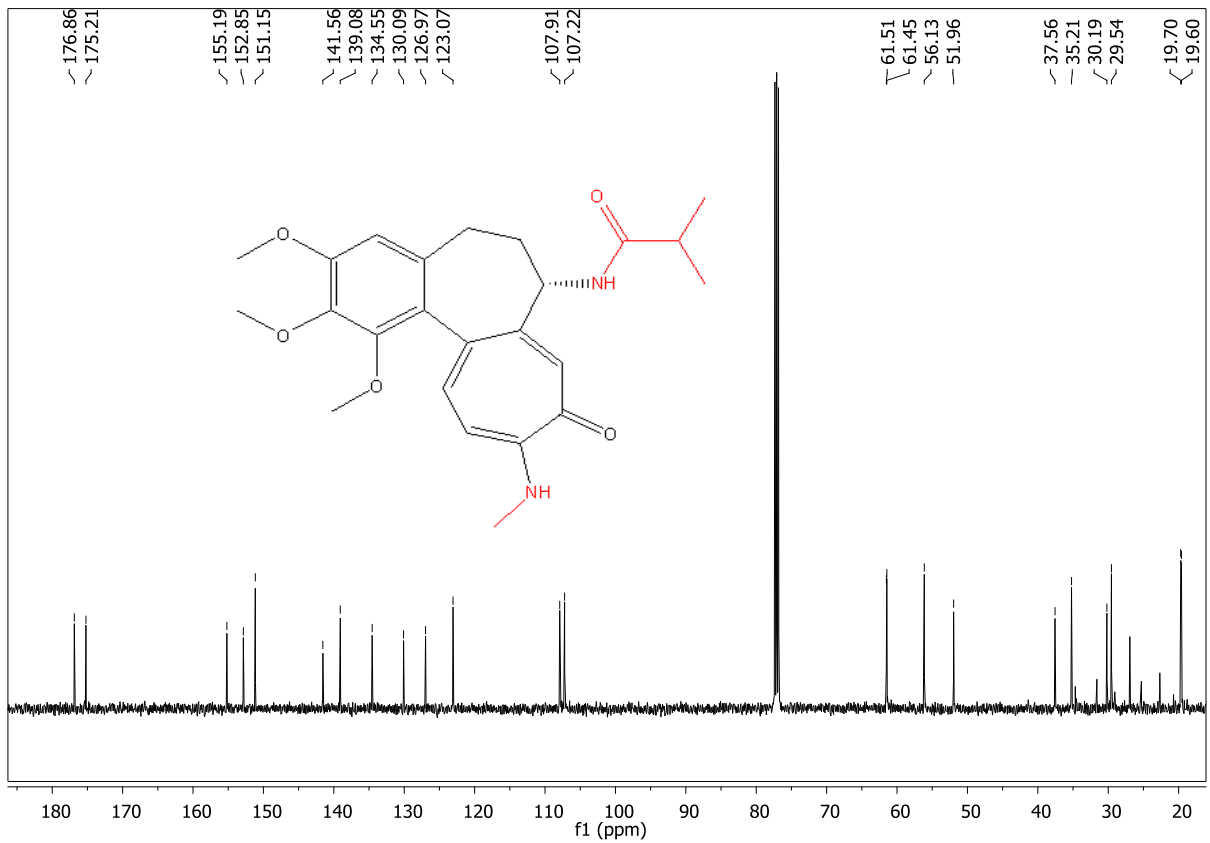

Figure S21. The <sup>13</sup>C NMR spectrum of **8** in CDCl<sub>3</sub>.

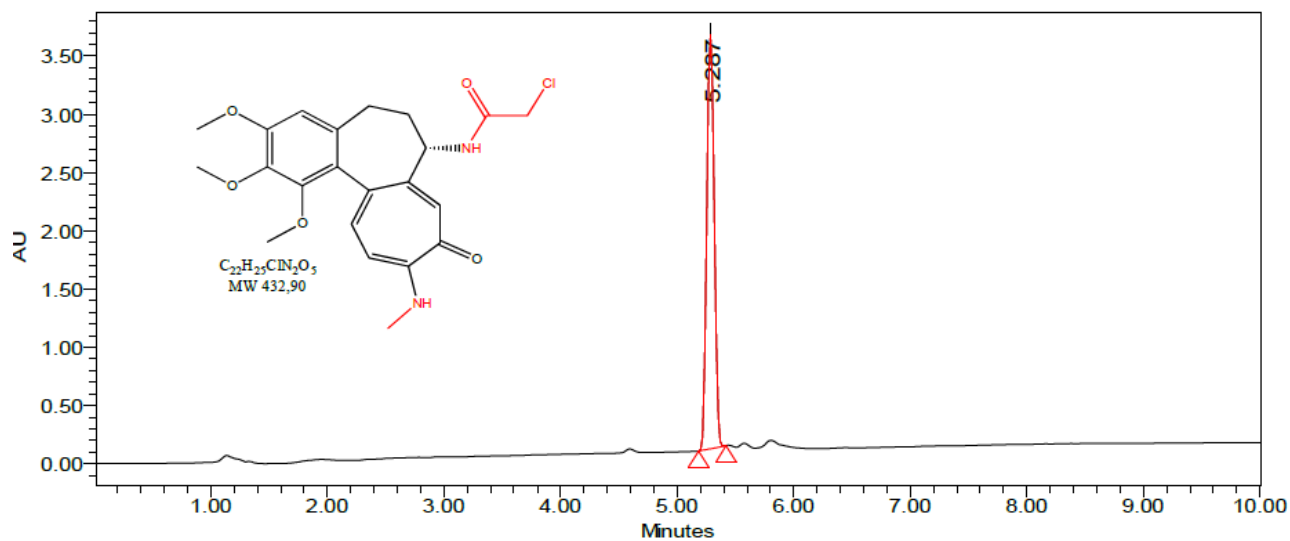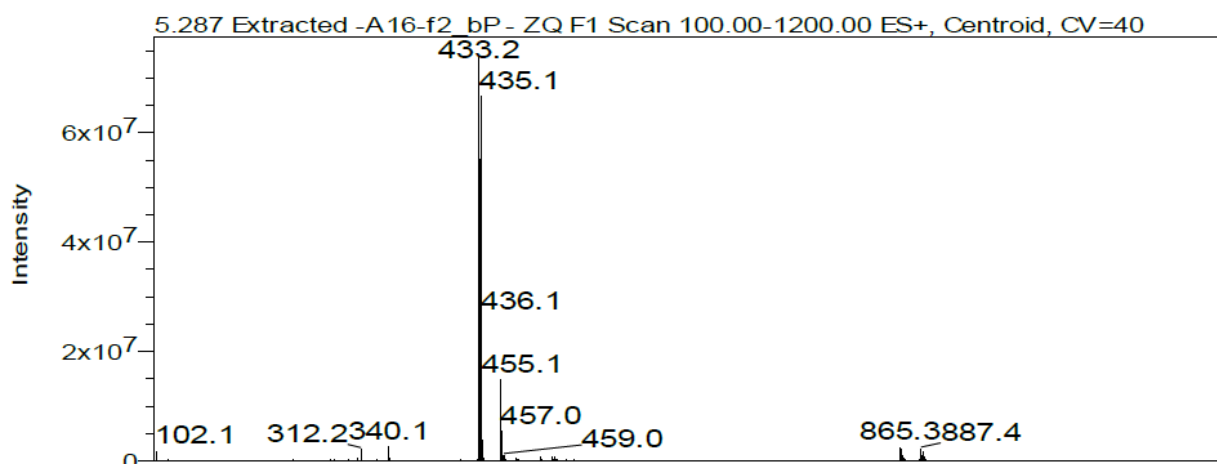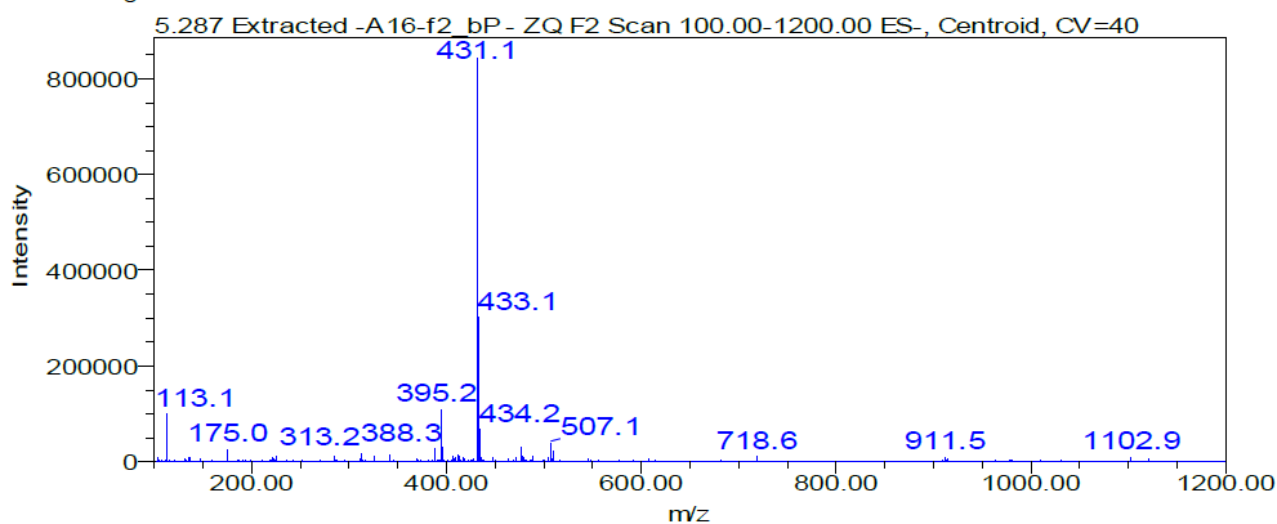

**Figure S22.** The LC-MS chromatogram and mass spectra of **9**.

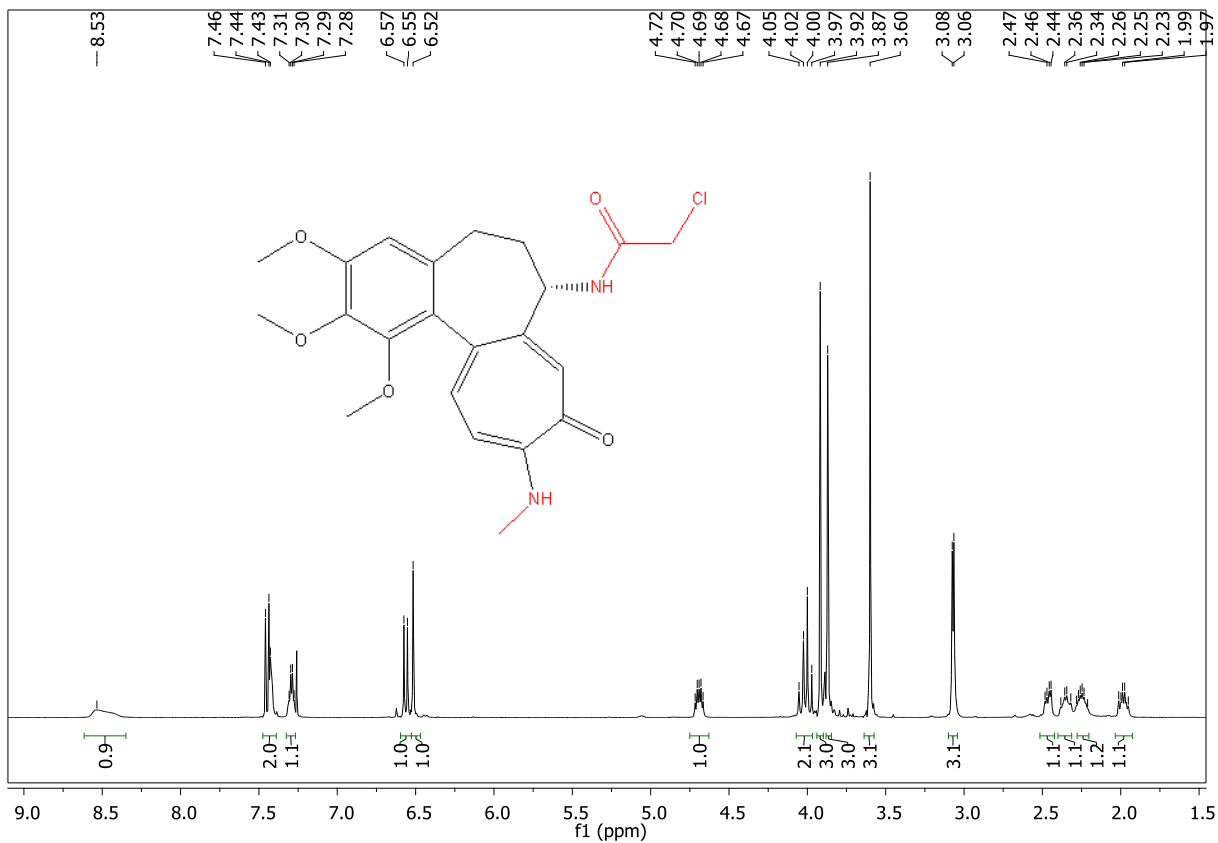

**Figure S23.** The  $^1\text{H}$  NMR spectrum of **9** in CDCl<sub>3</sub>.

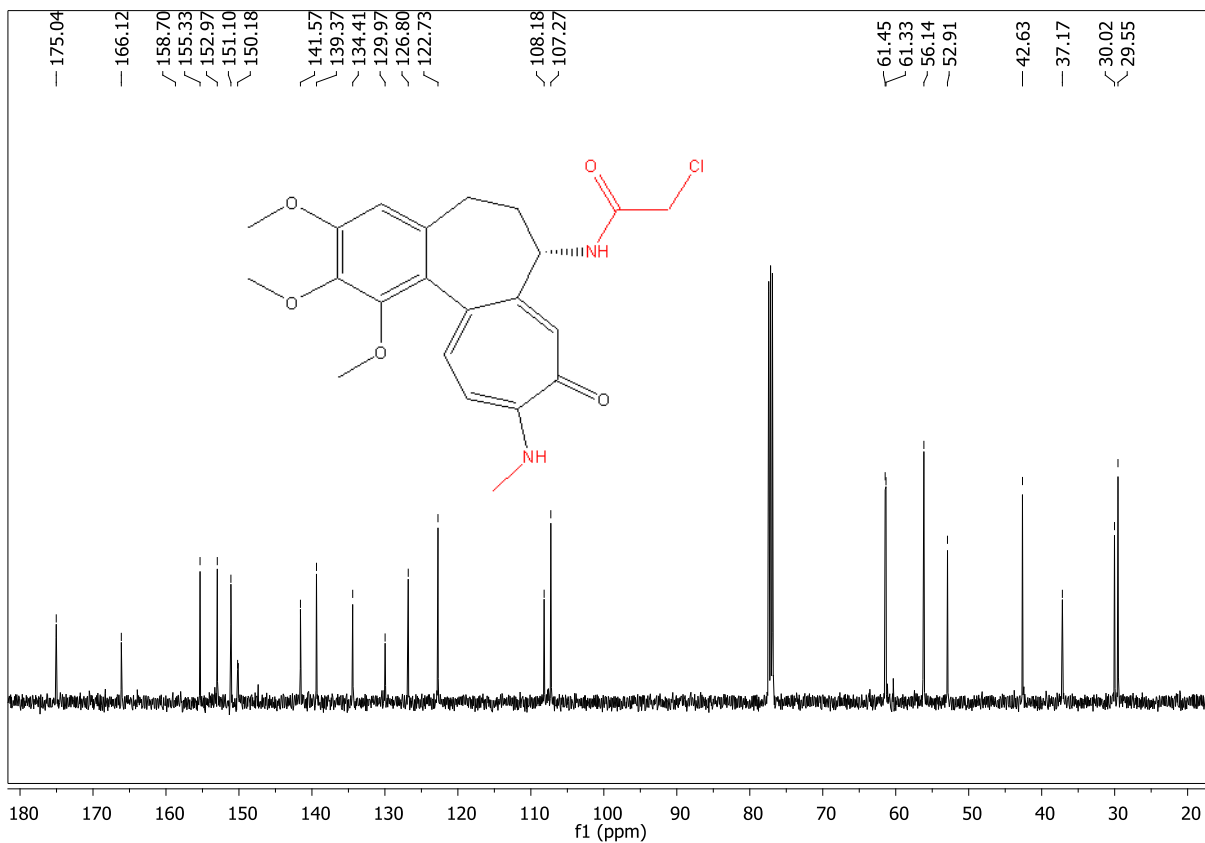

**Figure S24.** The  $^{13}\text{C}$  NMR spectrum of **9** in CDCl<sub>3</sub>.

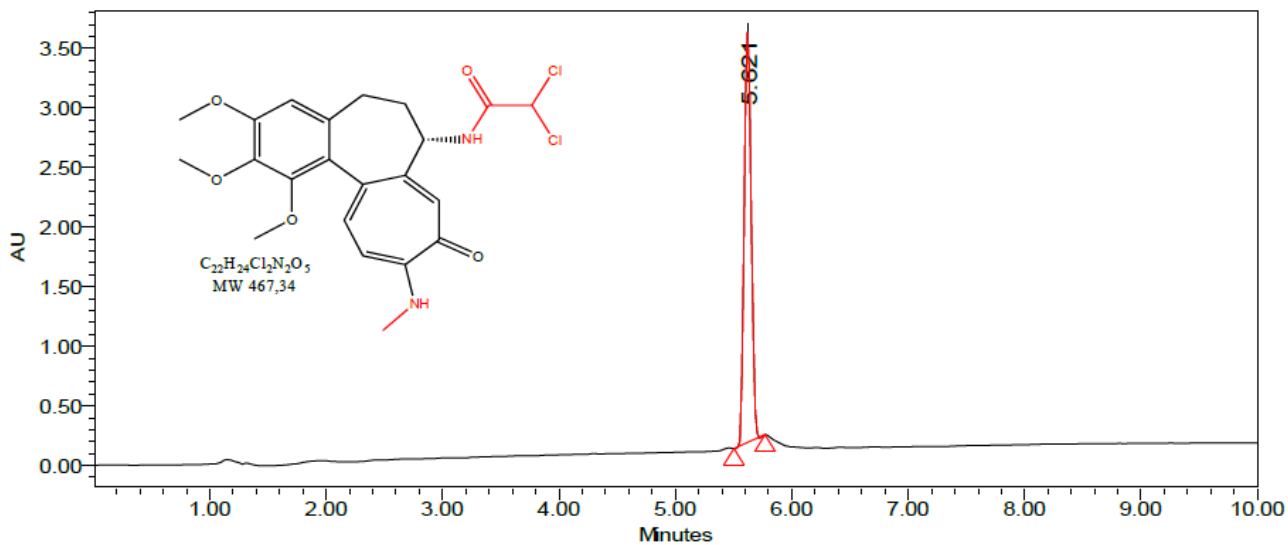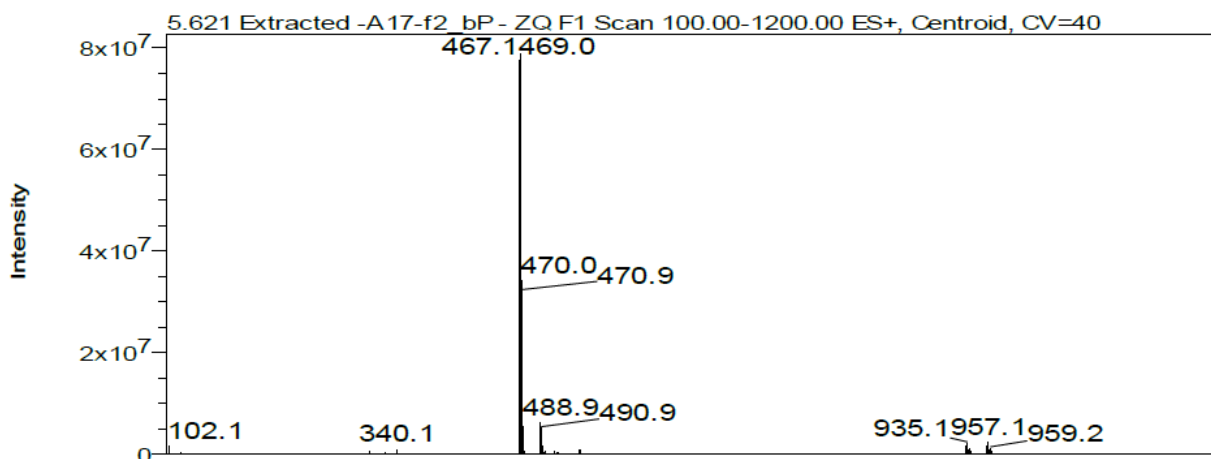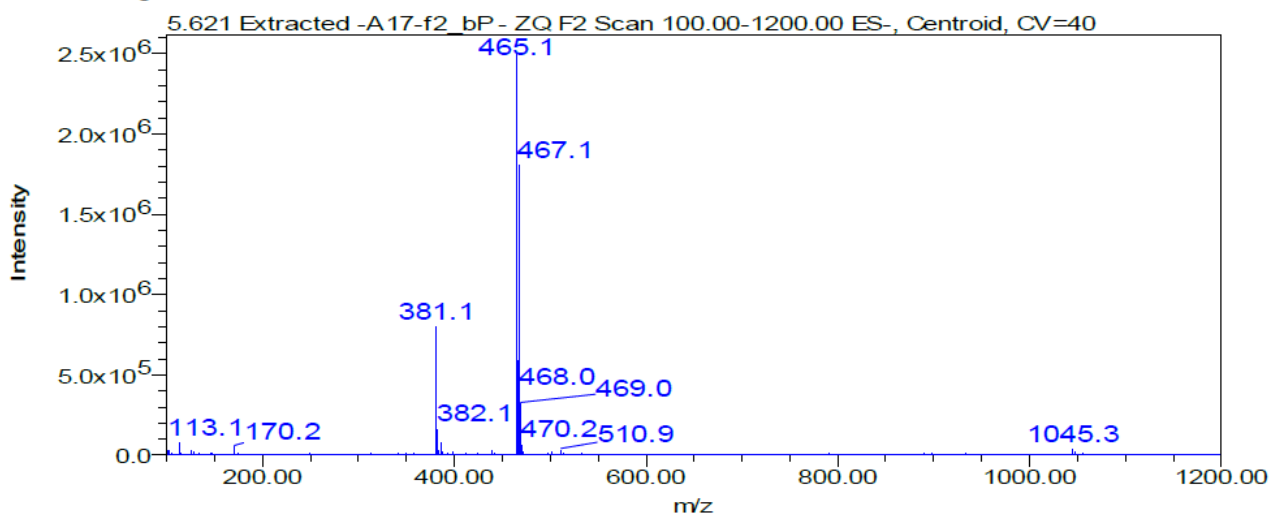

**Figure S25.** The LC-MS chromatogram and mass spectra of **10**.

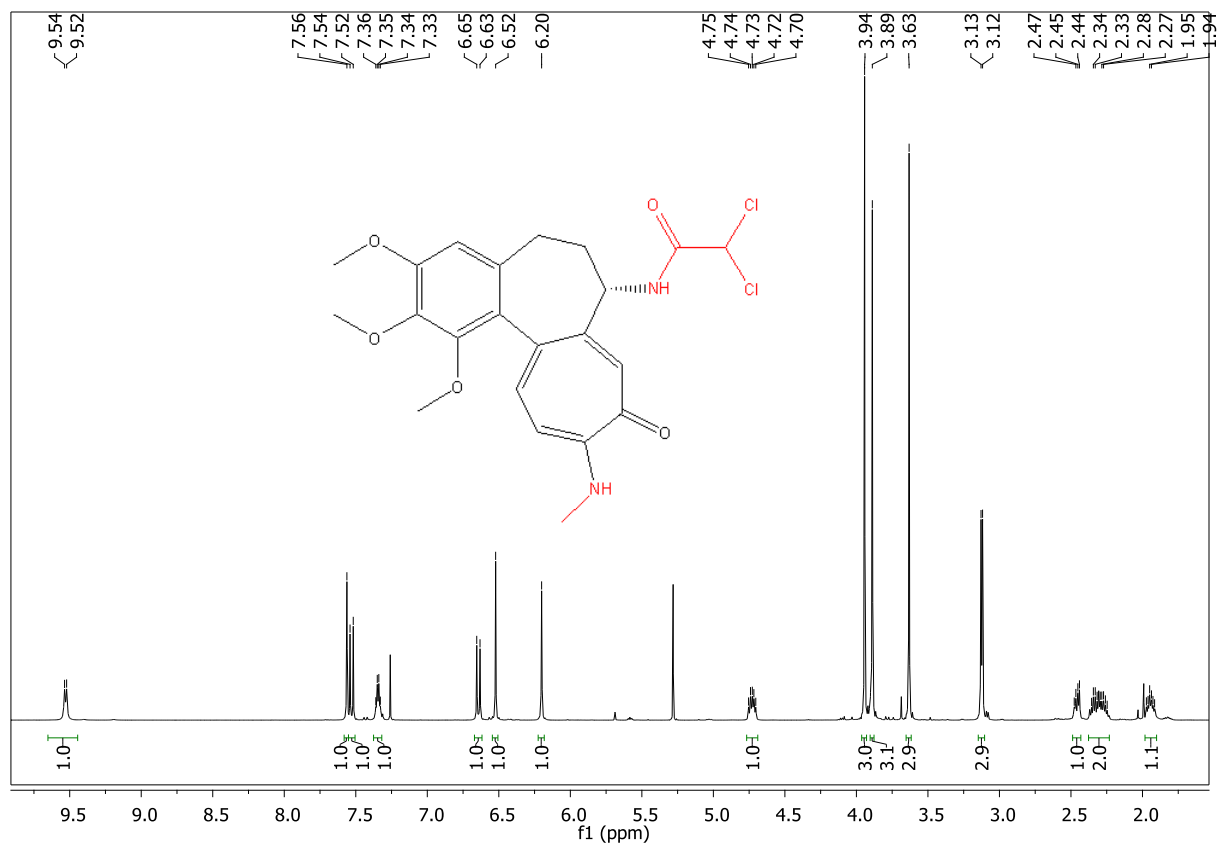

Figure S26. The  $^1\text{H}$  NMR spectrum of **10** in  $\text{CDCl}_3$ .

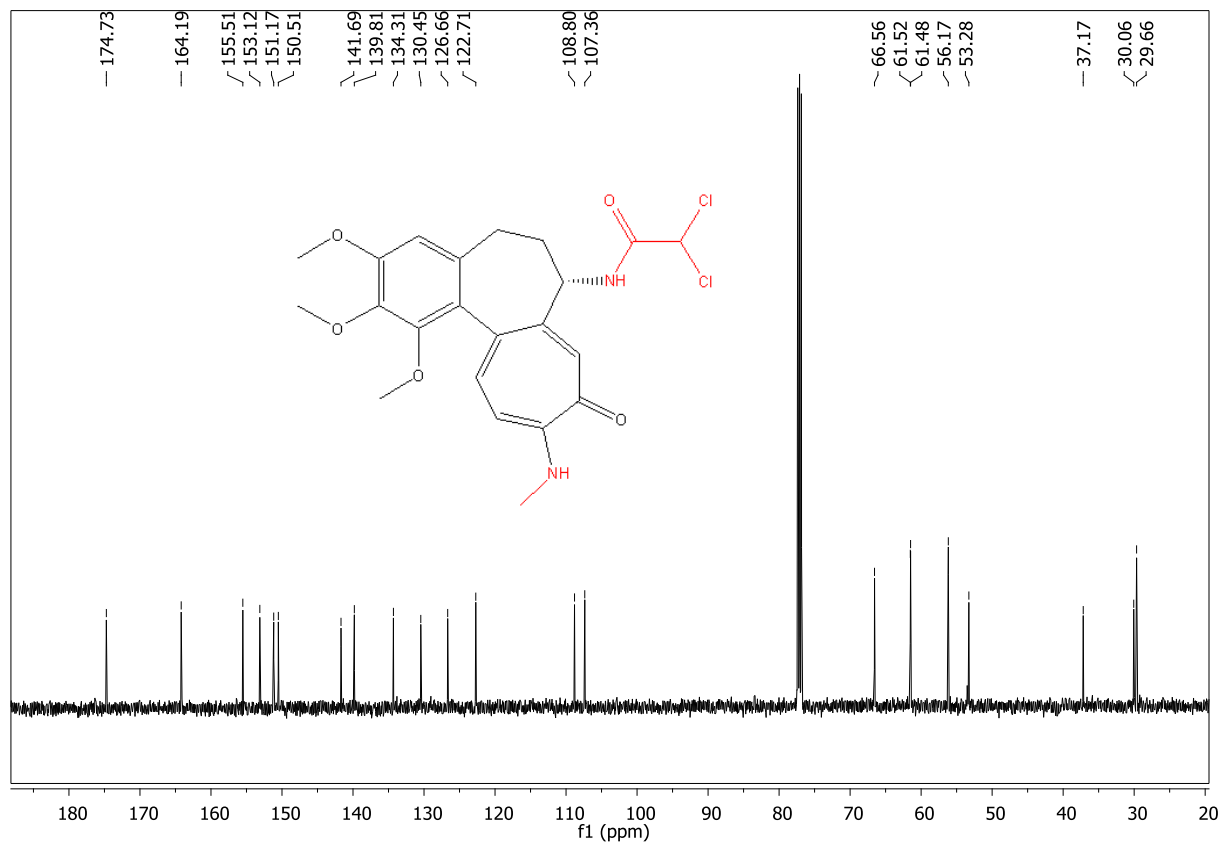

Figure S27. The  $^{13}\text{C}$  NMR spectrum of **10** in  $\text{CDCl}_3$ .

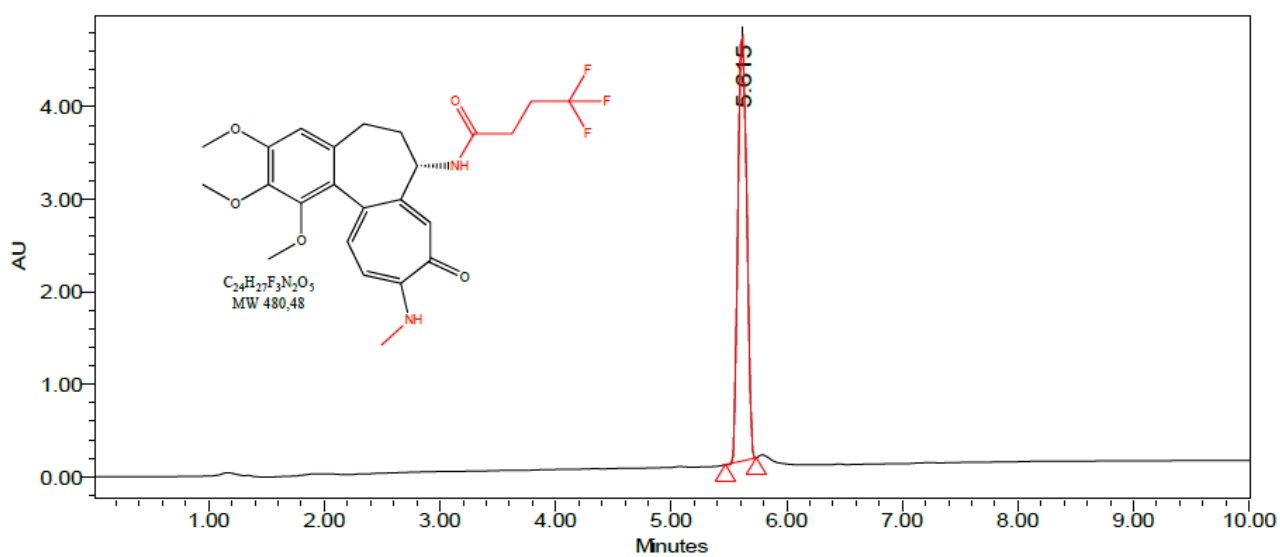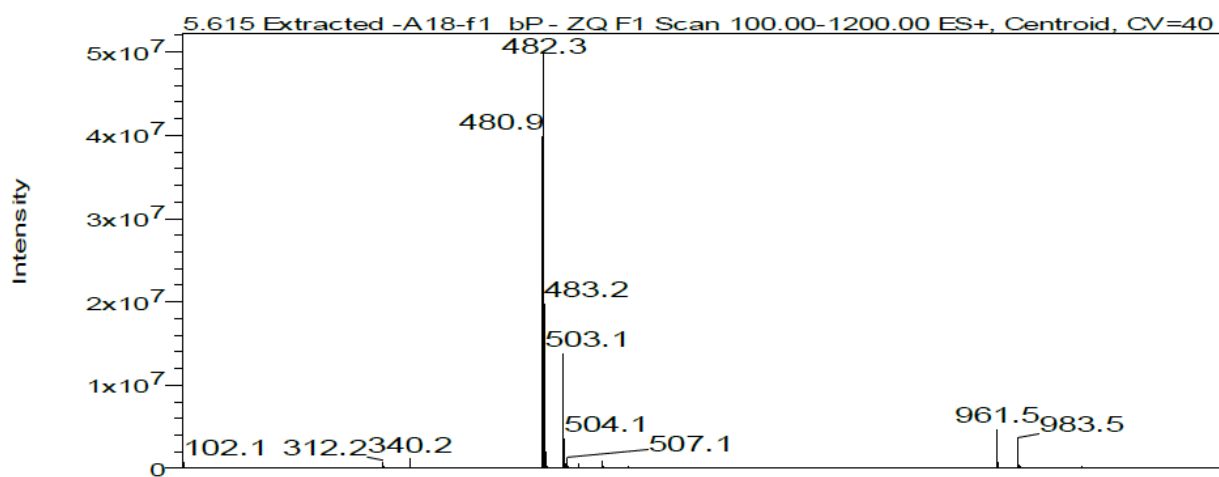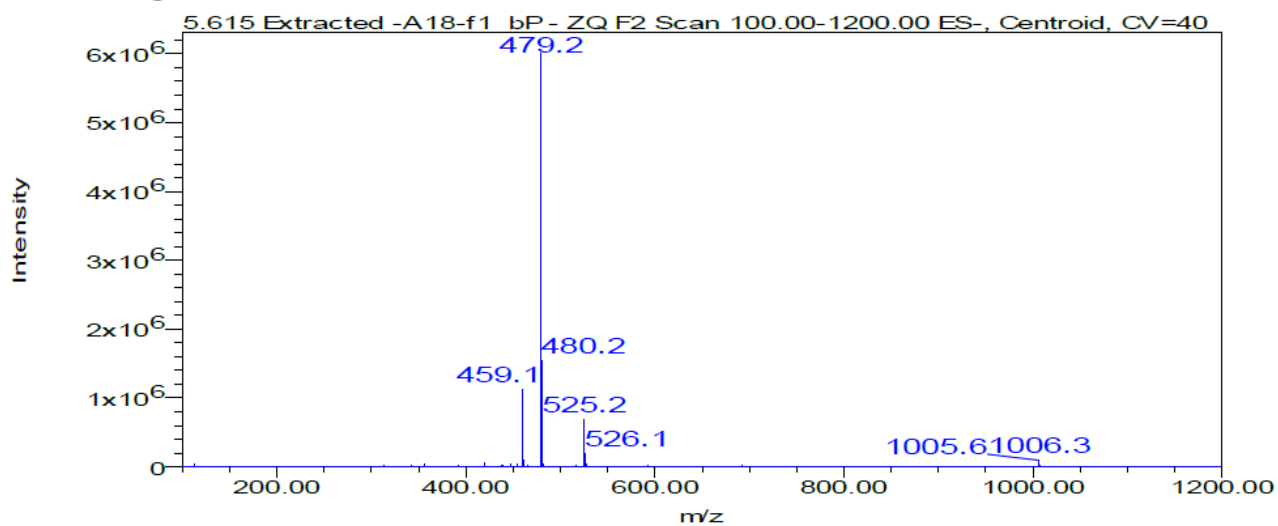

Figure S28. The LC-MS chromatogram and mass spectra of **11**.

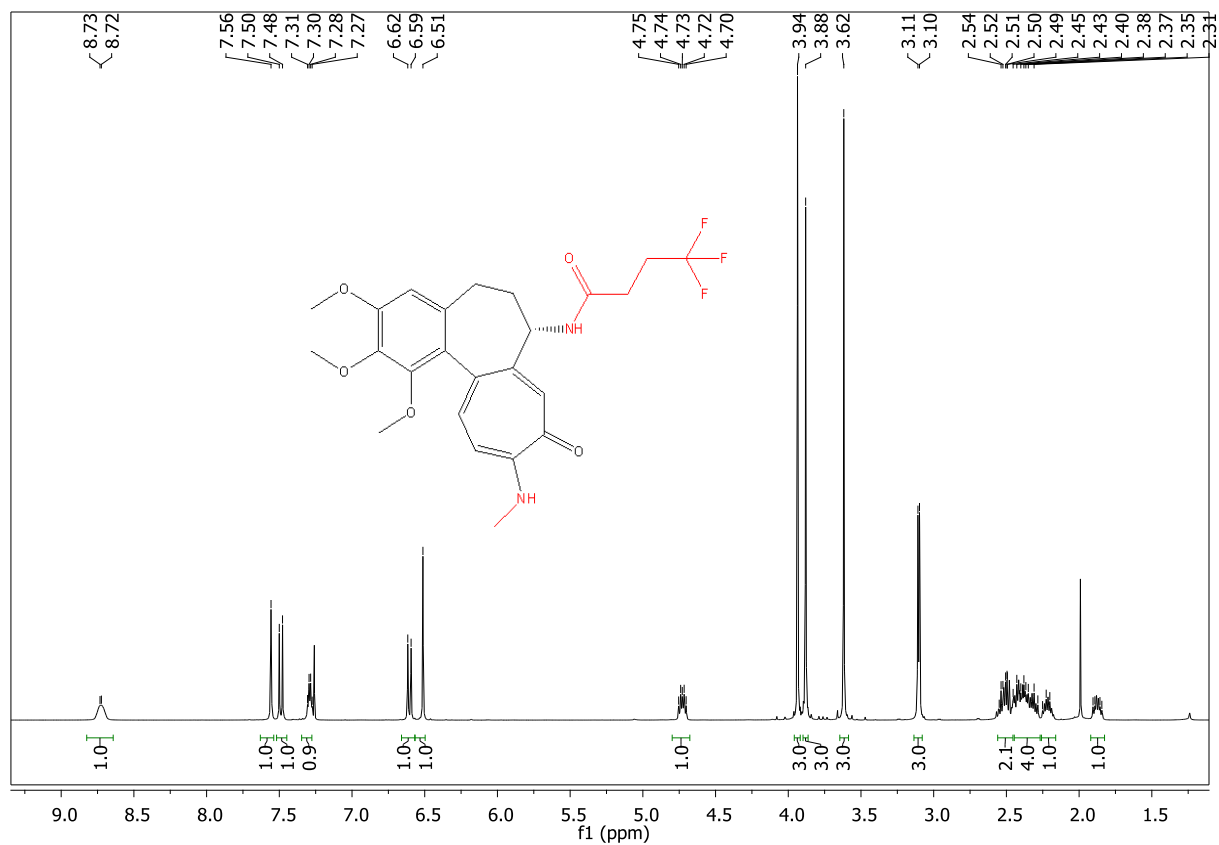

**Figure S29.** The <sup>1</sup>H NMR spectrum of **11** in CDCl<sub>3</sub>.

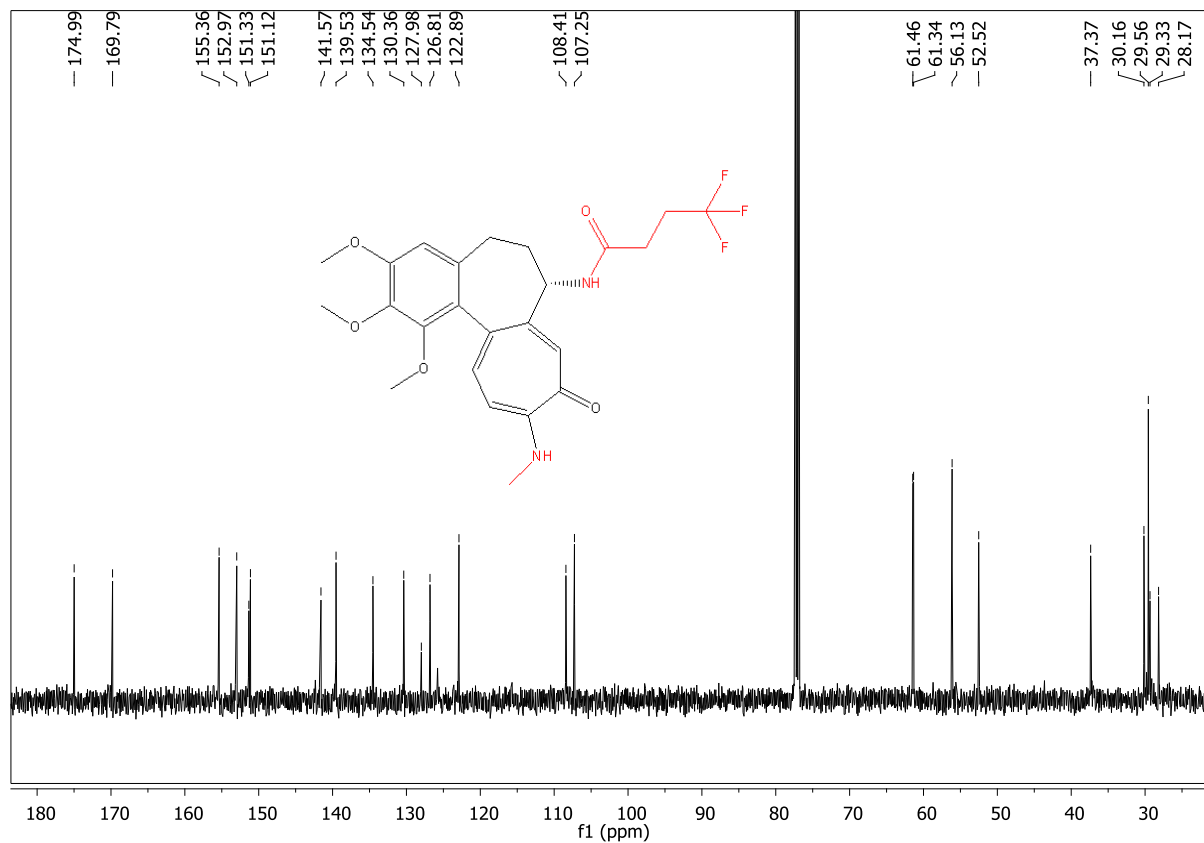

**Figure S30.** The <sup>13</sup>C NMR spectrum of **11** in CDCl<sub>3</sub>.





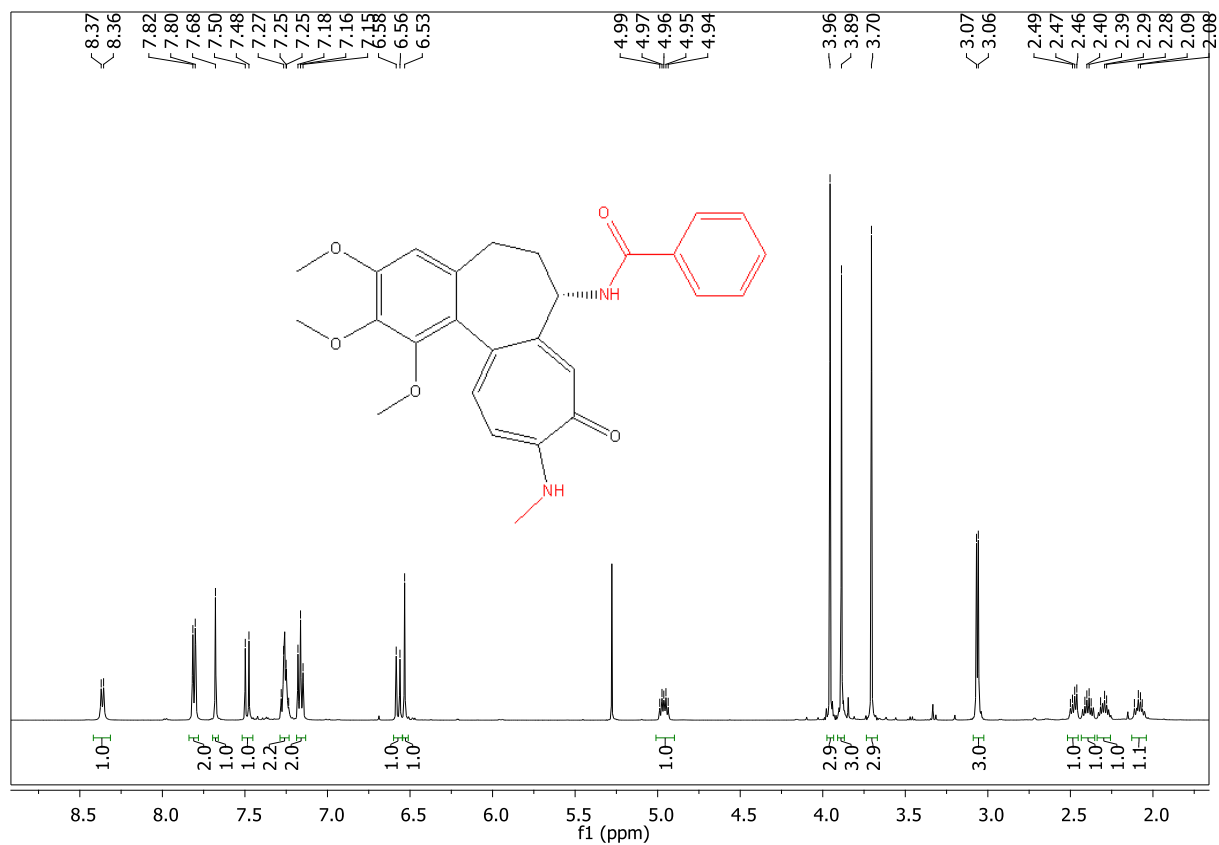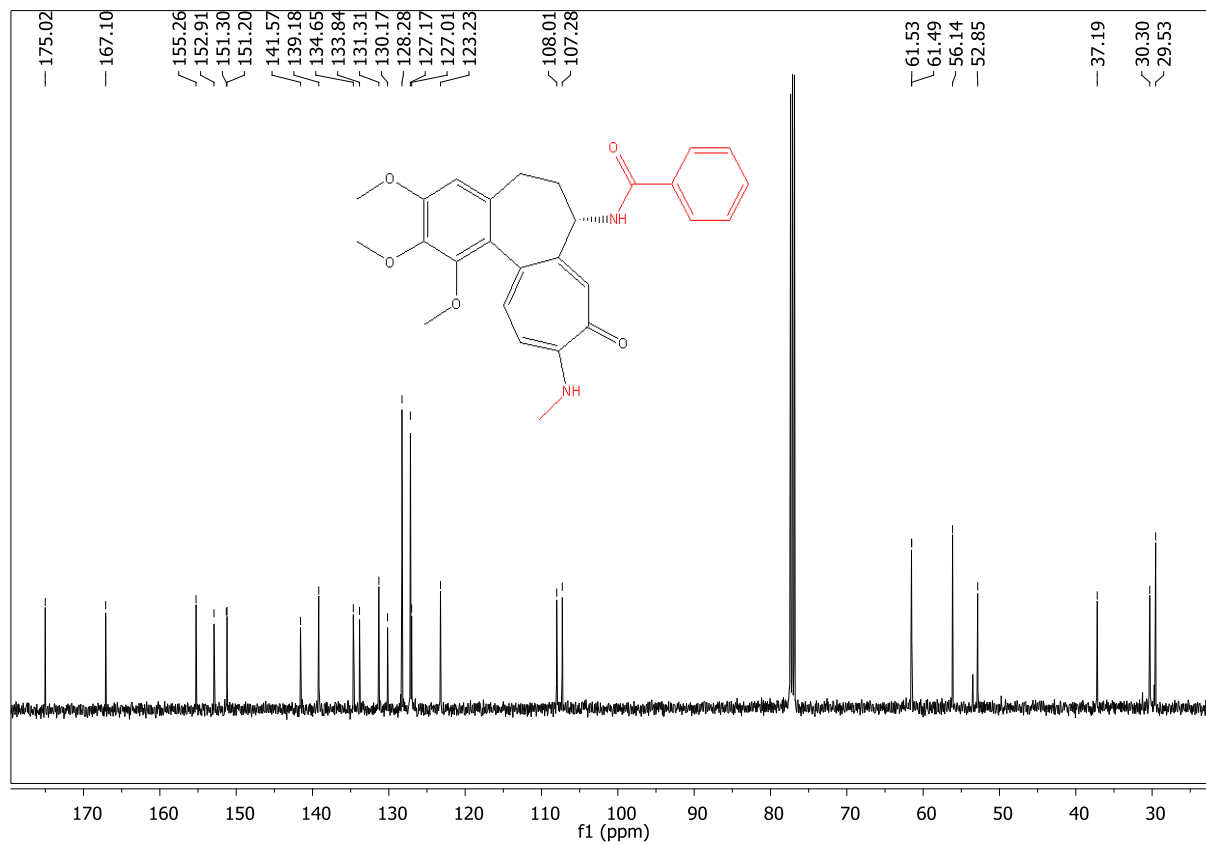

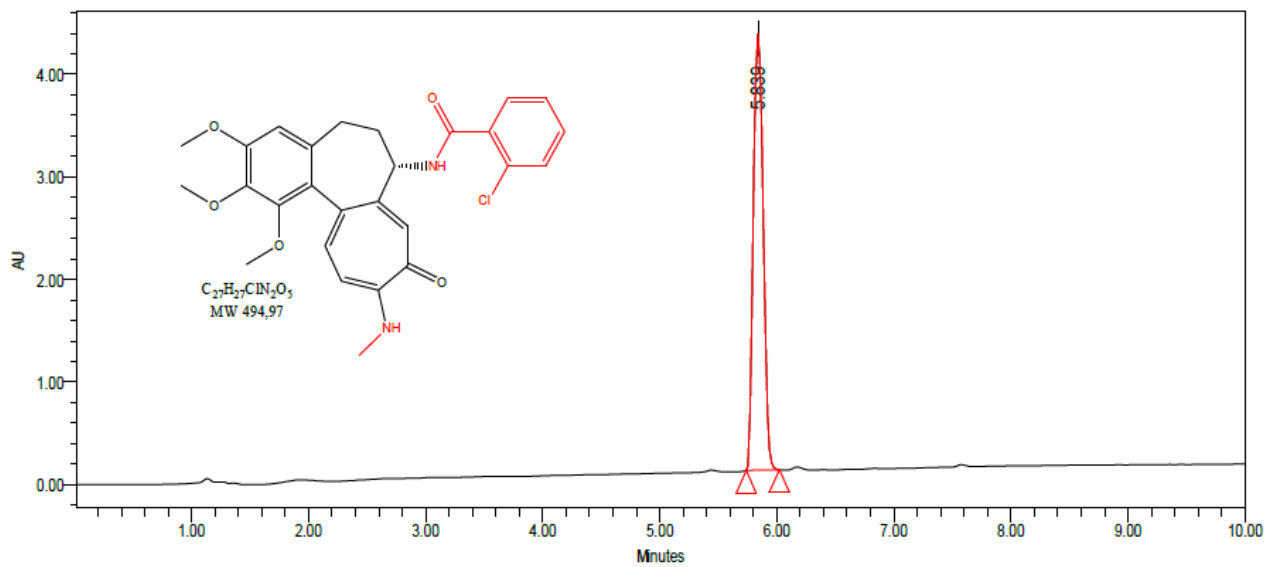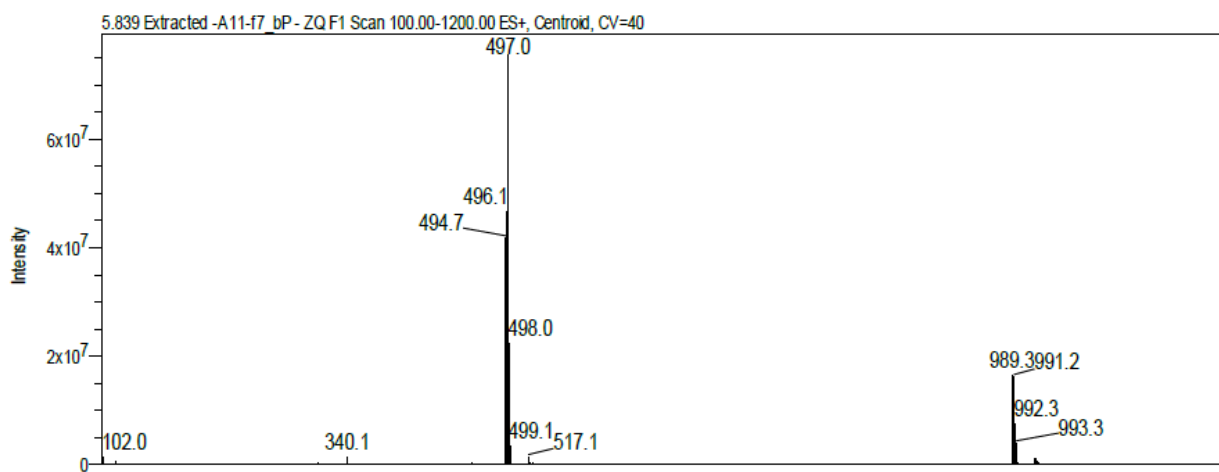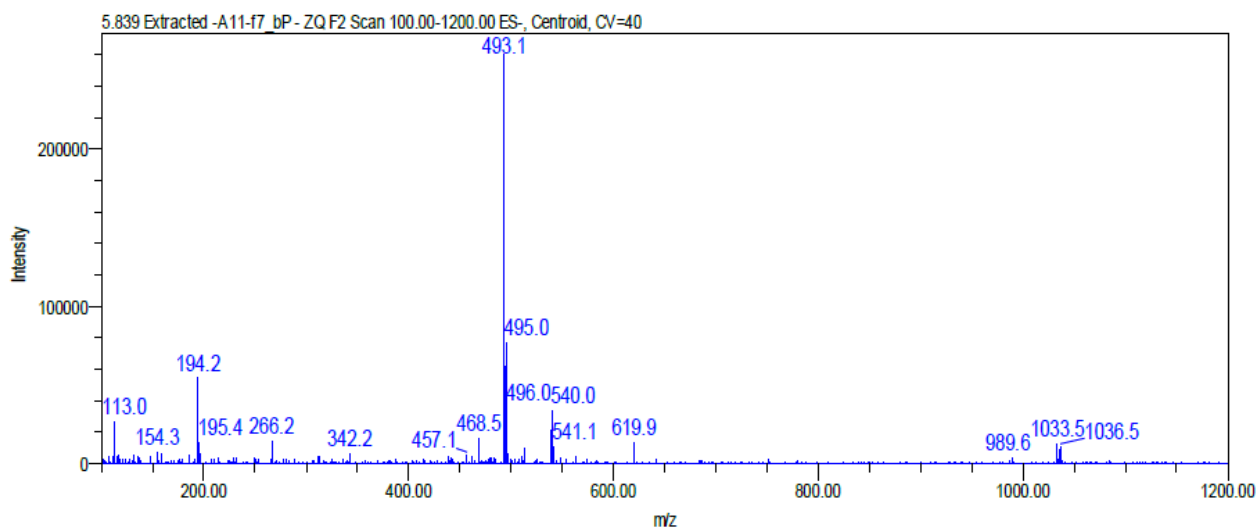

**Figure S34.** The LC-MS chromatogram and mass spectra of **13**.

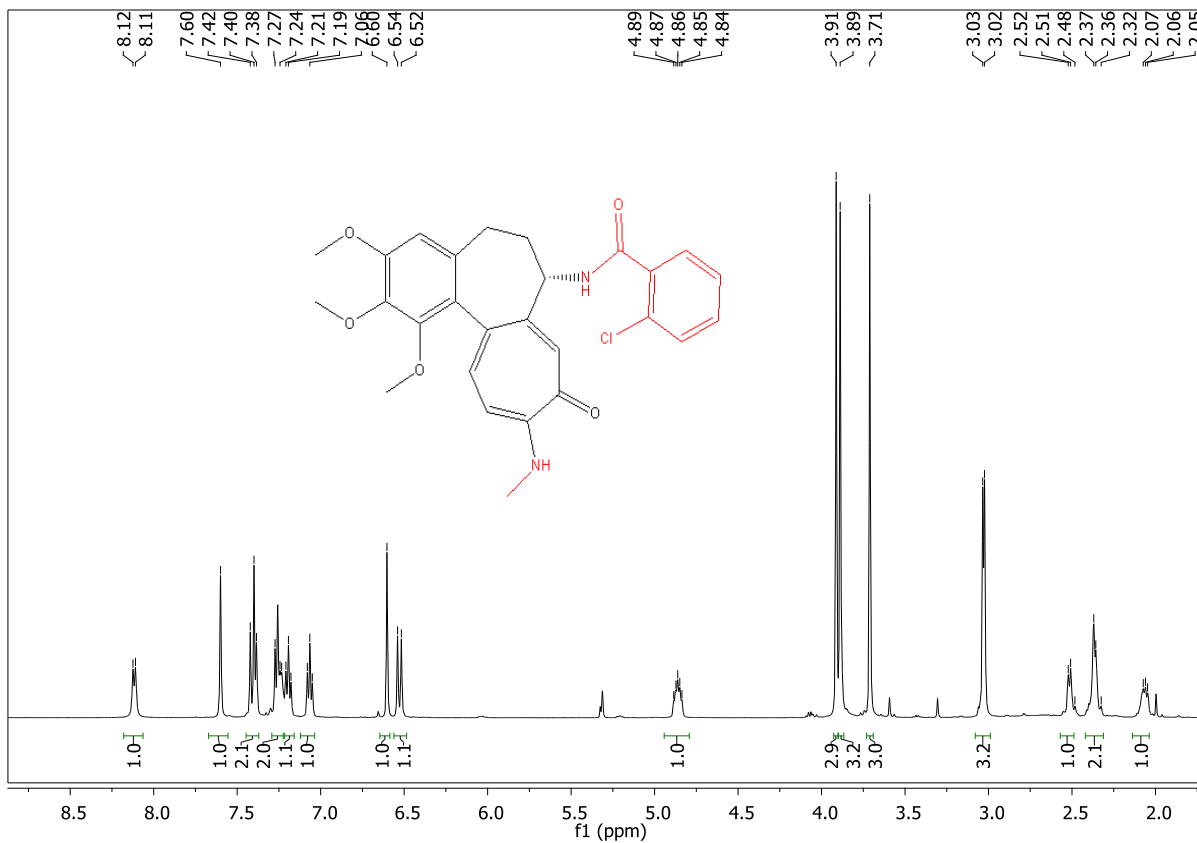

Figure S35. The  $^1\text{H}$  NMR spectrum of **13** in  $\text{CD}_2\text{Cl}_2$ .

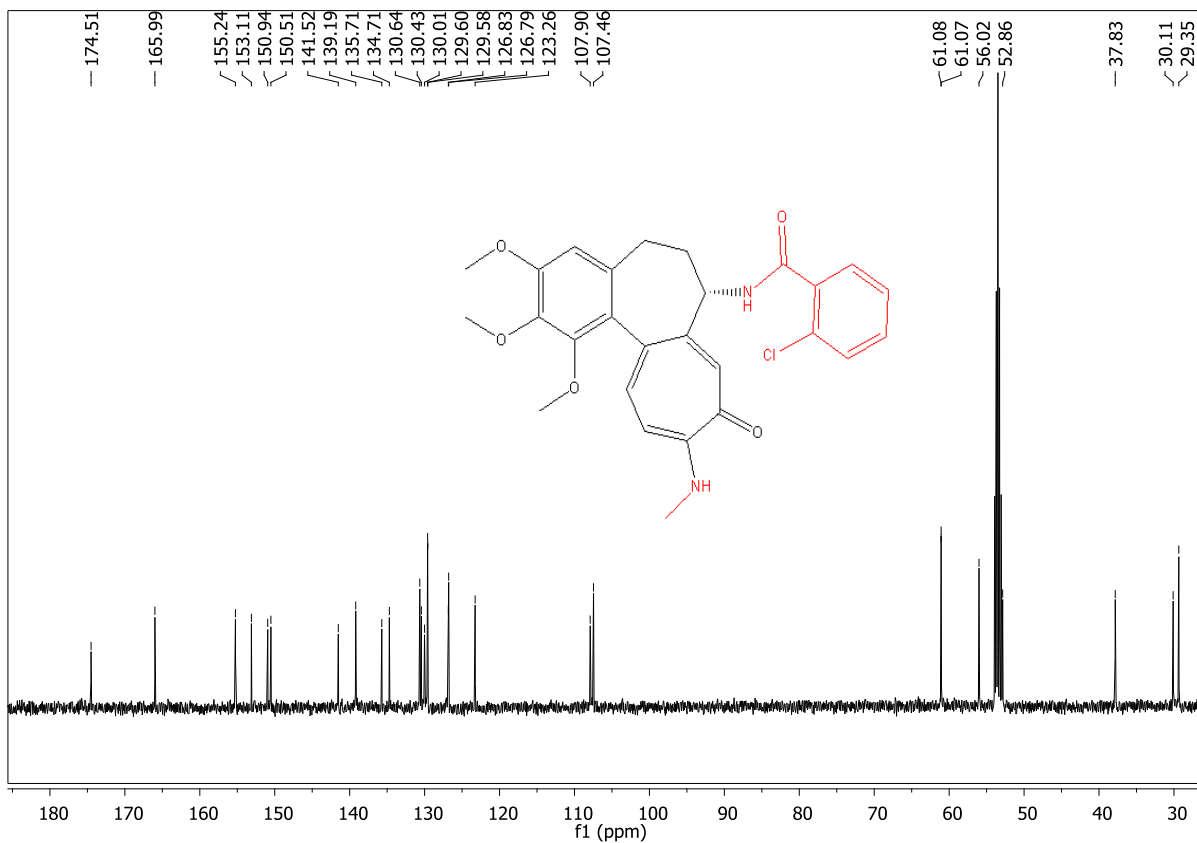

Figure S36. The  $^{13}\text{C}$  NMR spectrum of **13** in  $\text{CD}_2\text{Cl}_2$ .

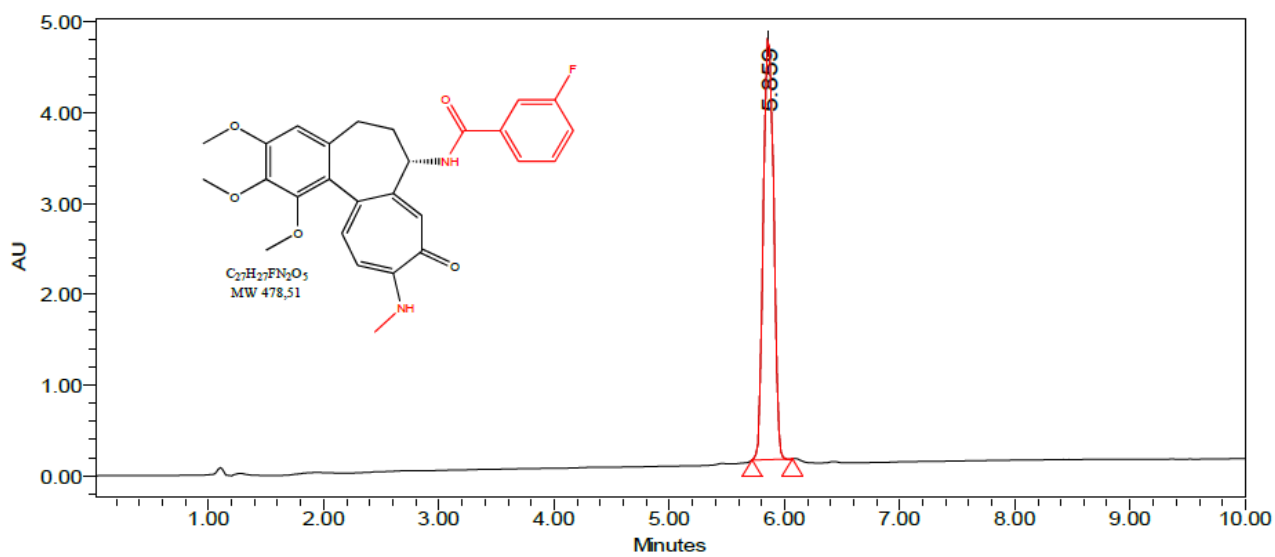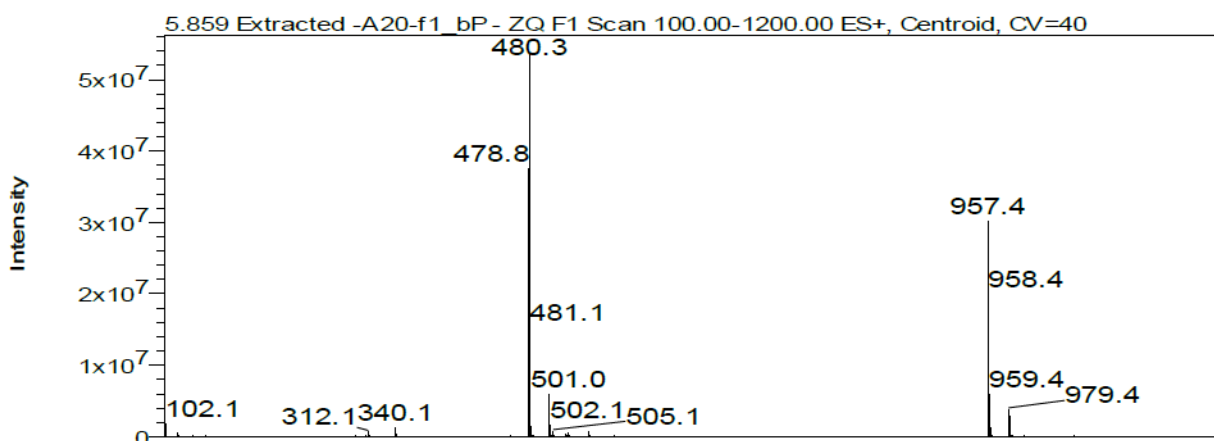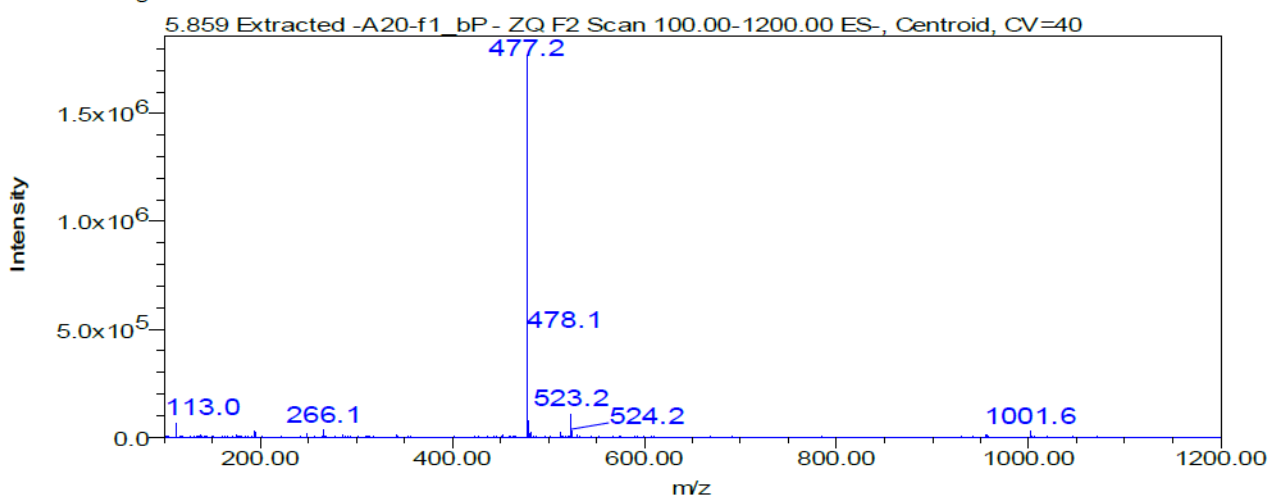

**Figure S37.** The LC-MS chromatogram and mass spectra of **14**.

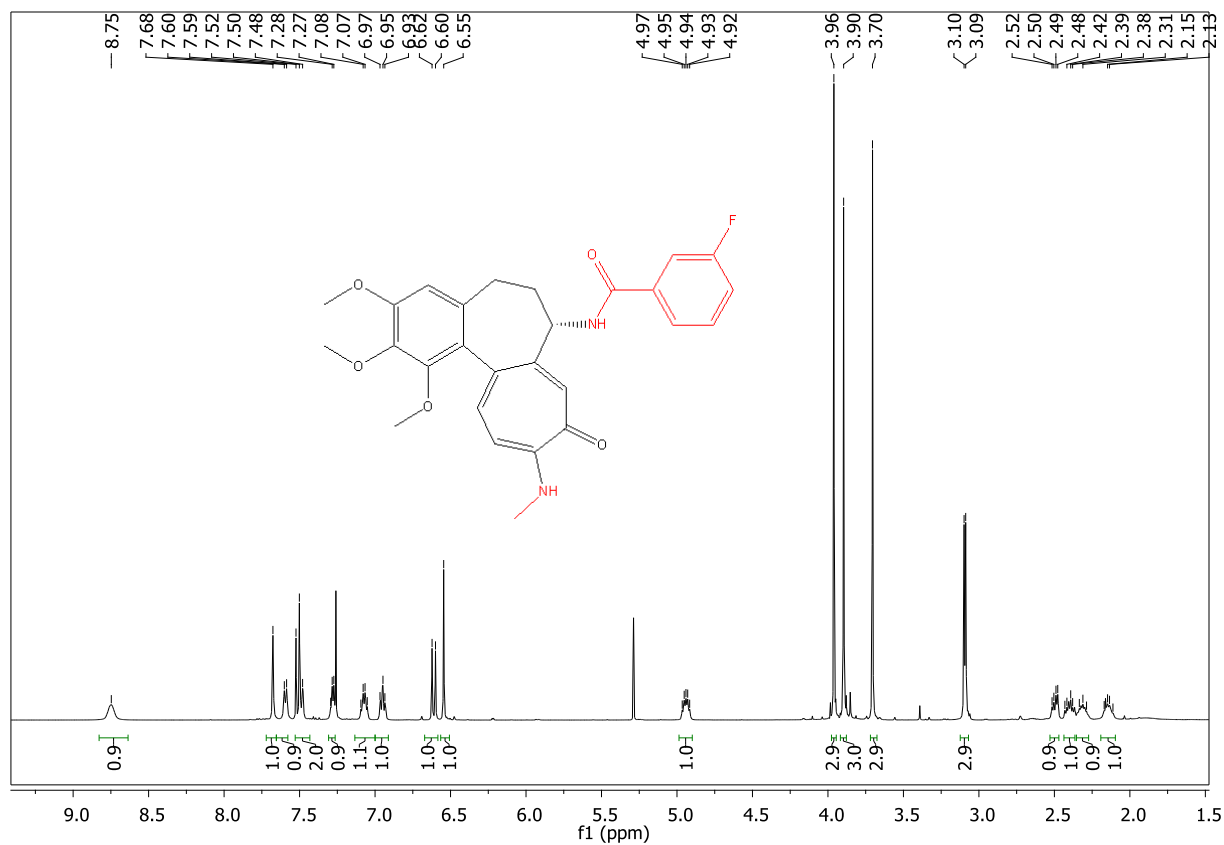

Figure S38. The  $^1\text{H}$  NMR spectrum of 14 in  $\text{CDCl}_3$ .

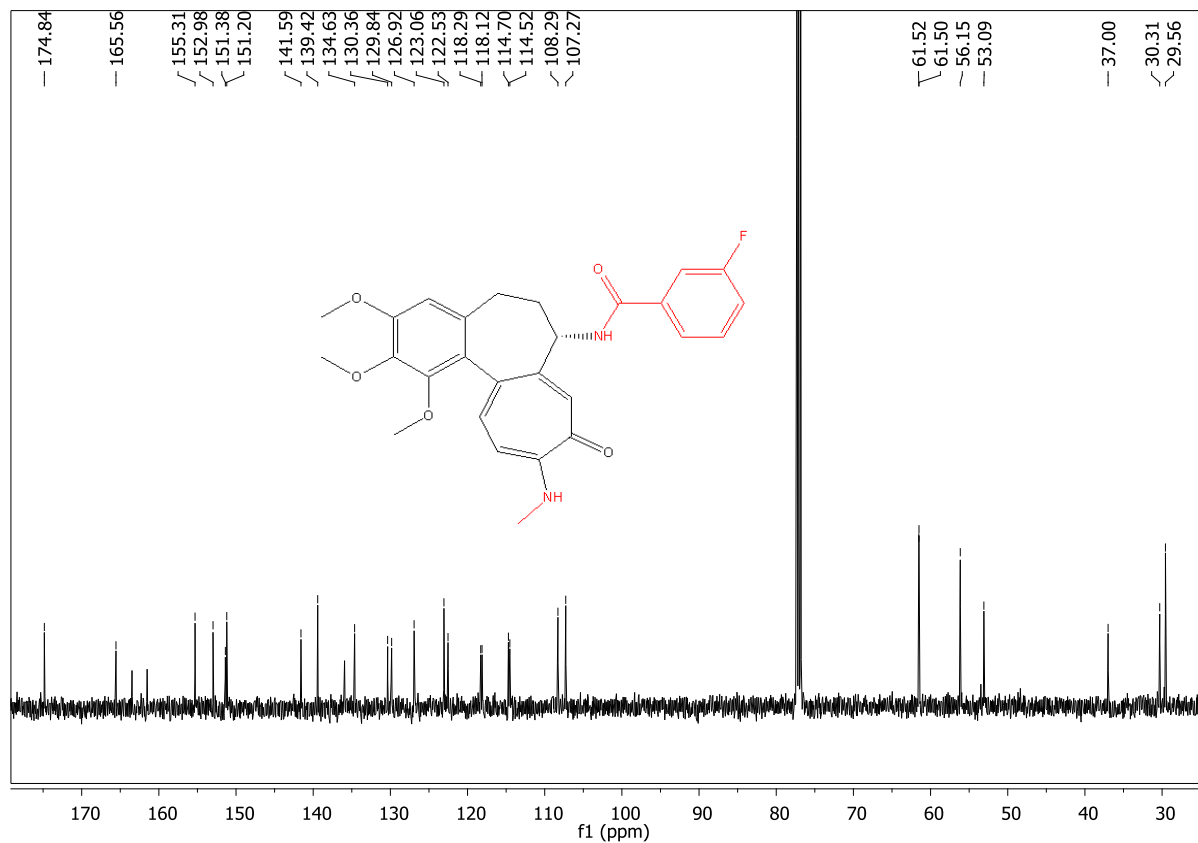

Figure S39. The  $^{13}\text{C}$  NMR spectrum of 14 in  $\text{CDCl}_3$ .

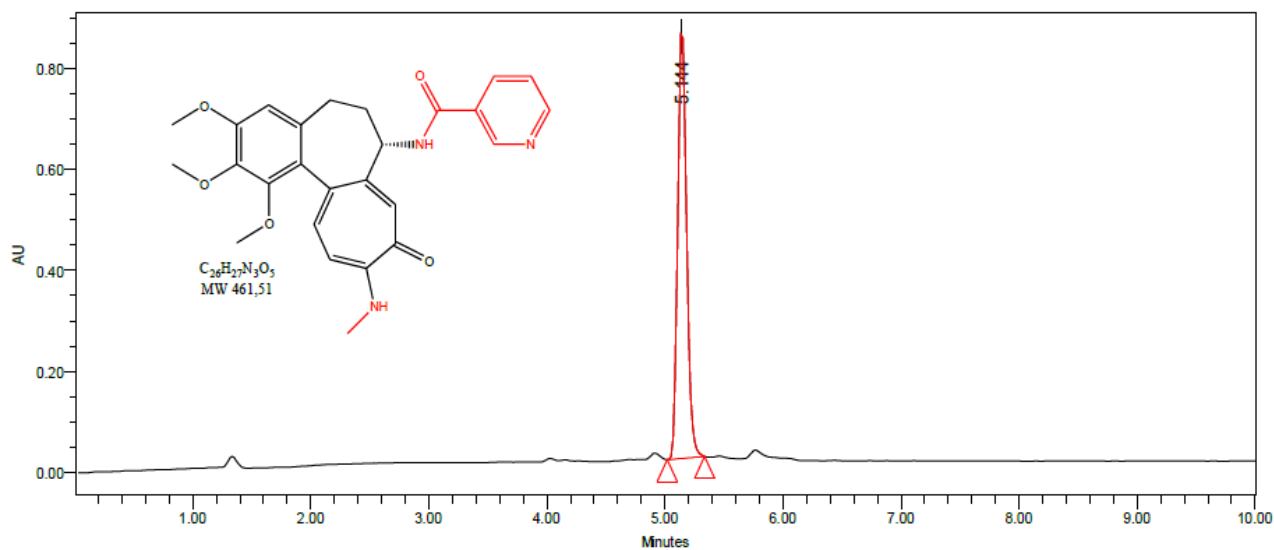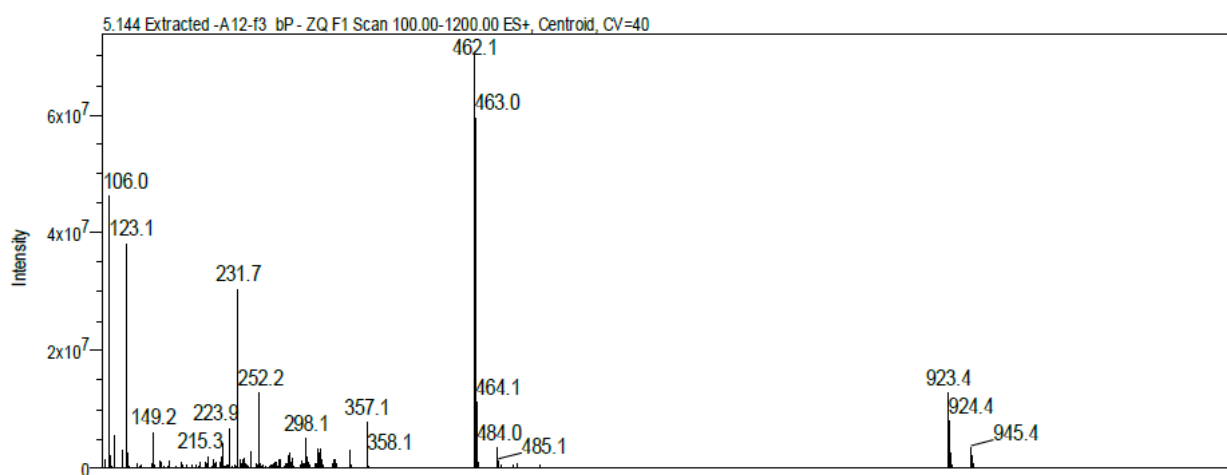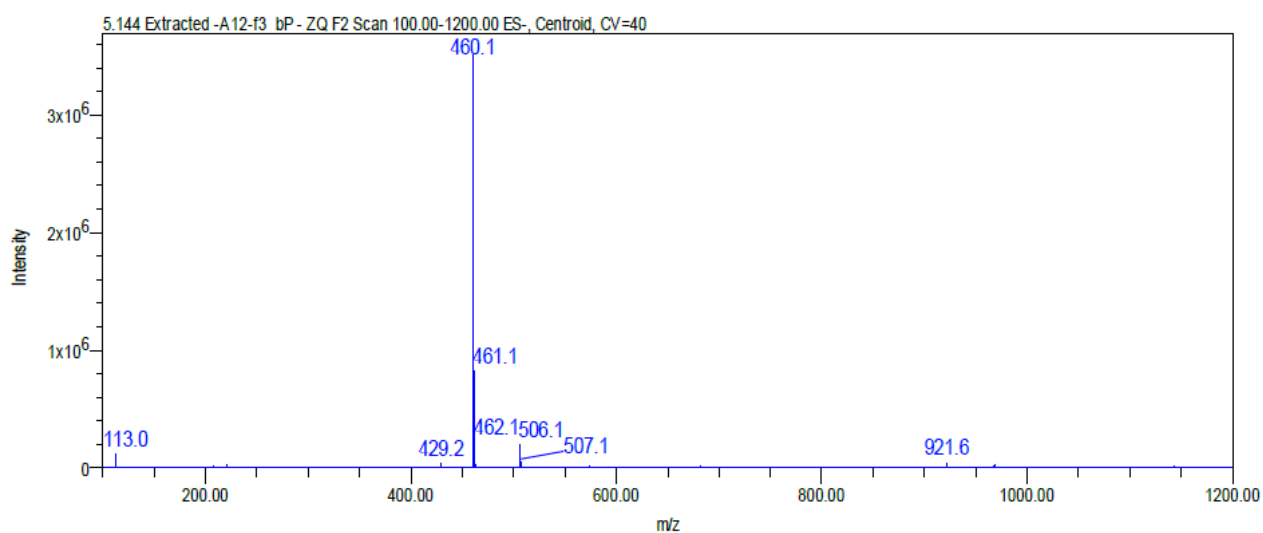

**Figure S40.** The LC-MS chromatogram and mass spectra of **15**.

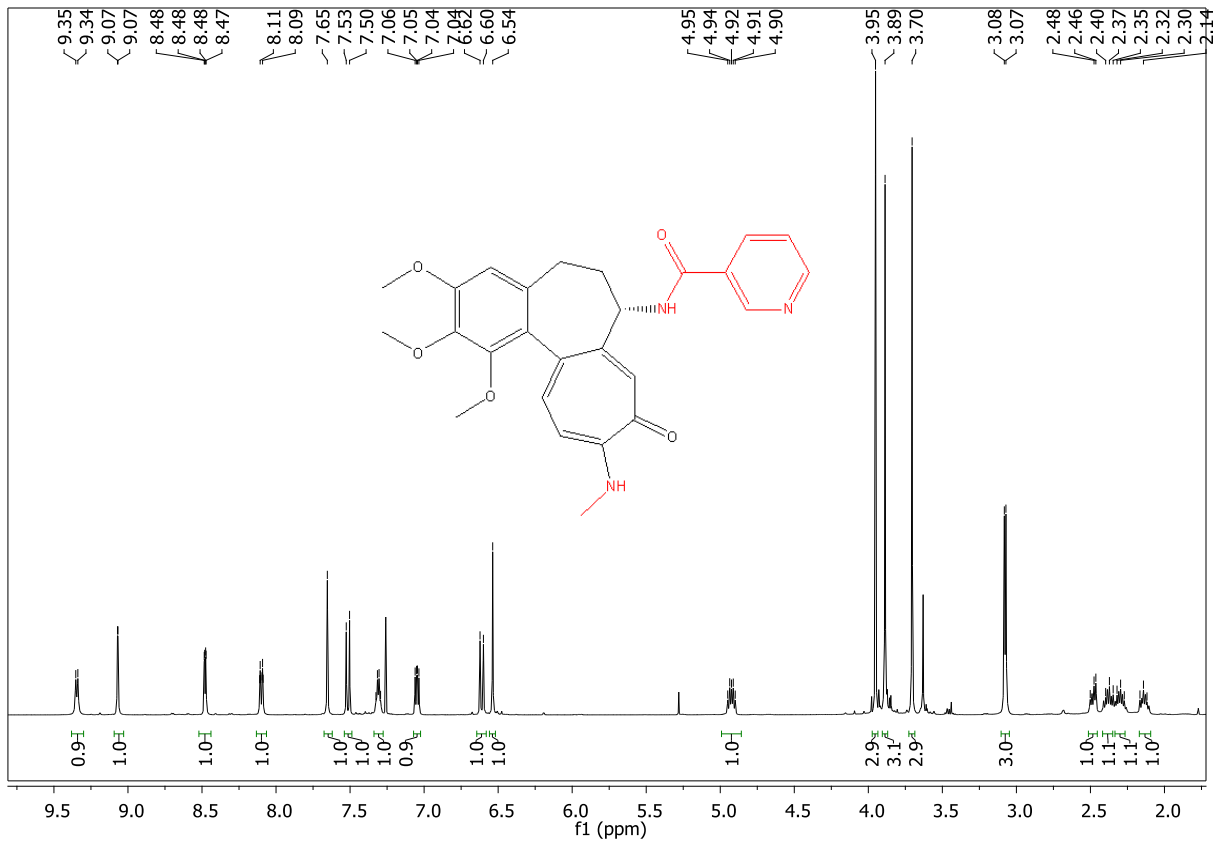

**Figure S41.** The <sup>1</sup>H NMR spectrum of **15** in CDCl<sub>3</sub>.

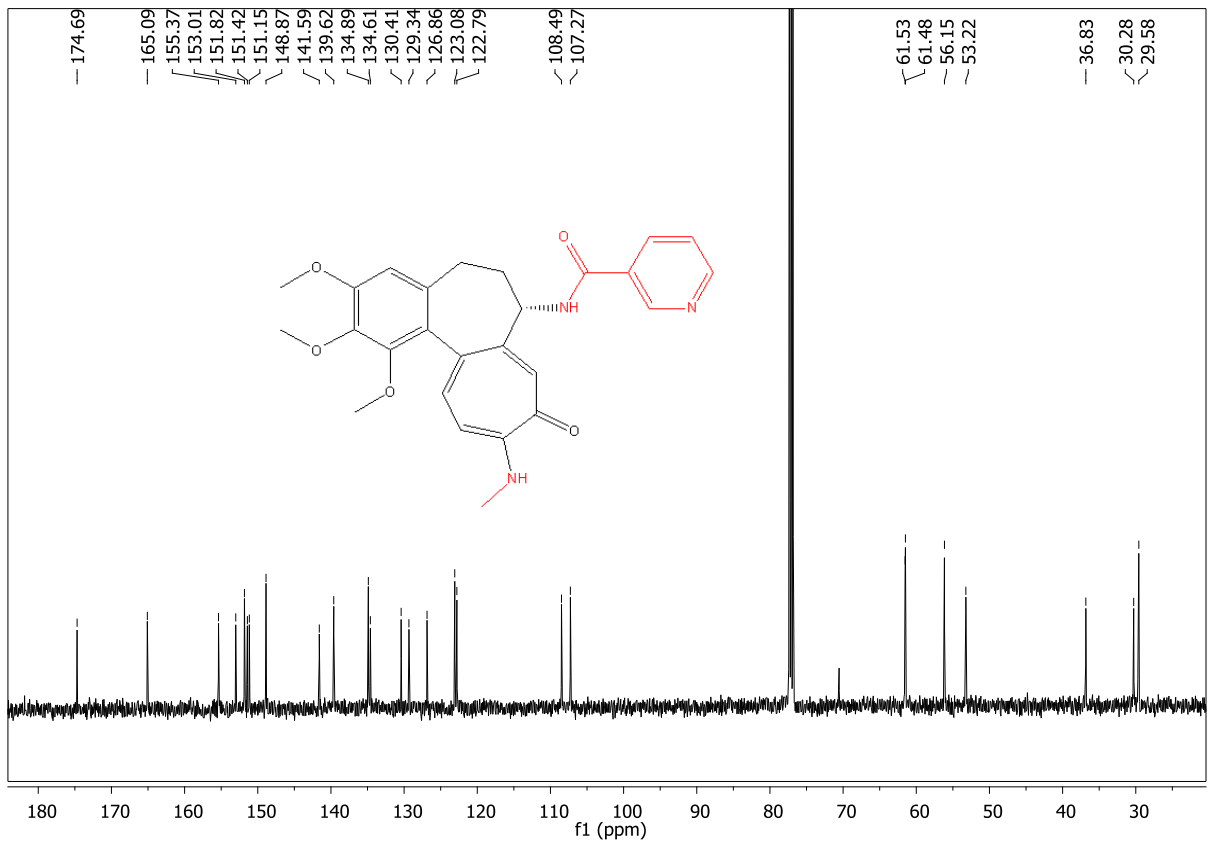

**Figure S42.** The <sup>13</sup>C NMR spectrum of **15** in CDCl<sub>3</sub>.



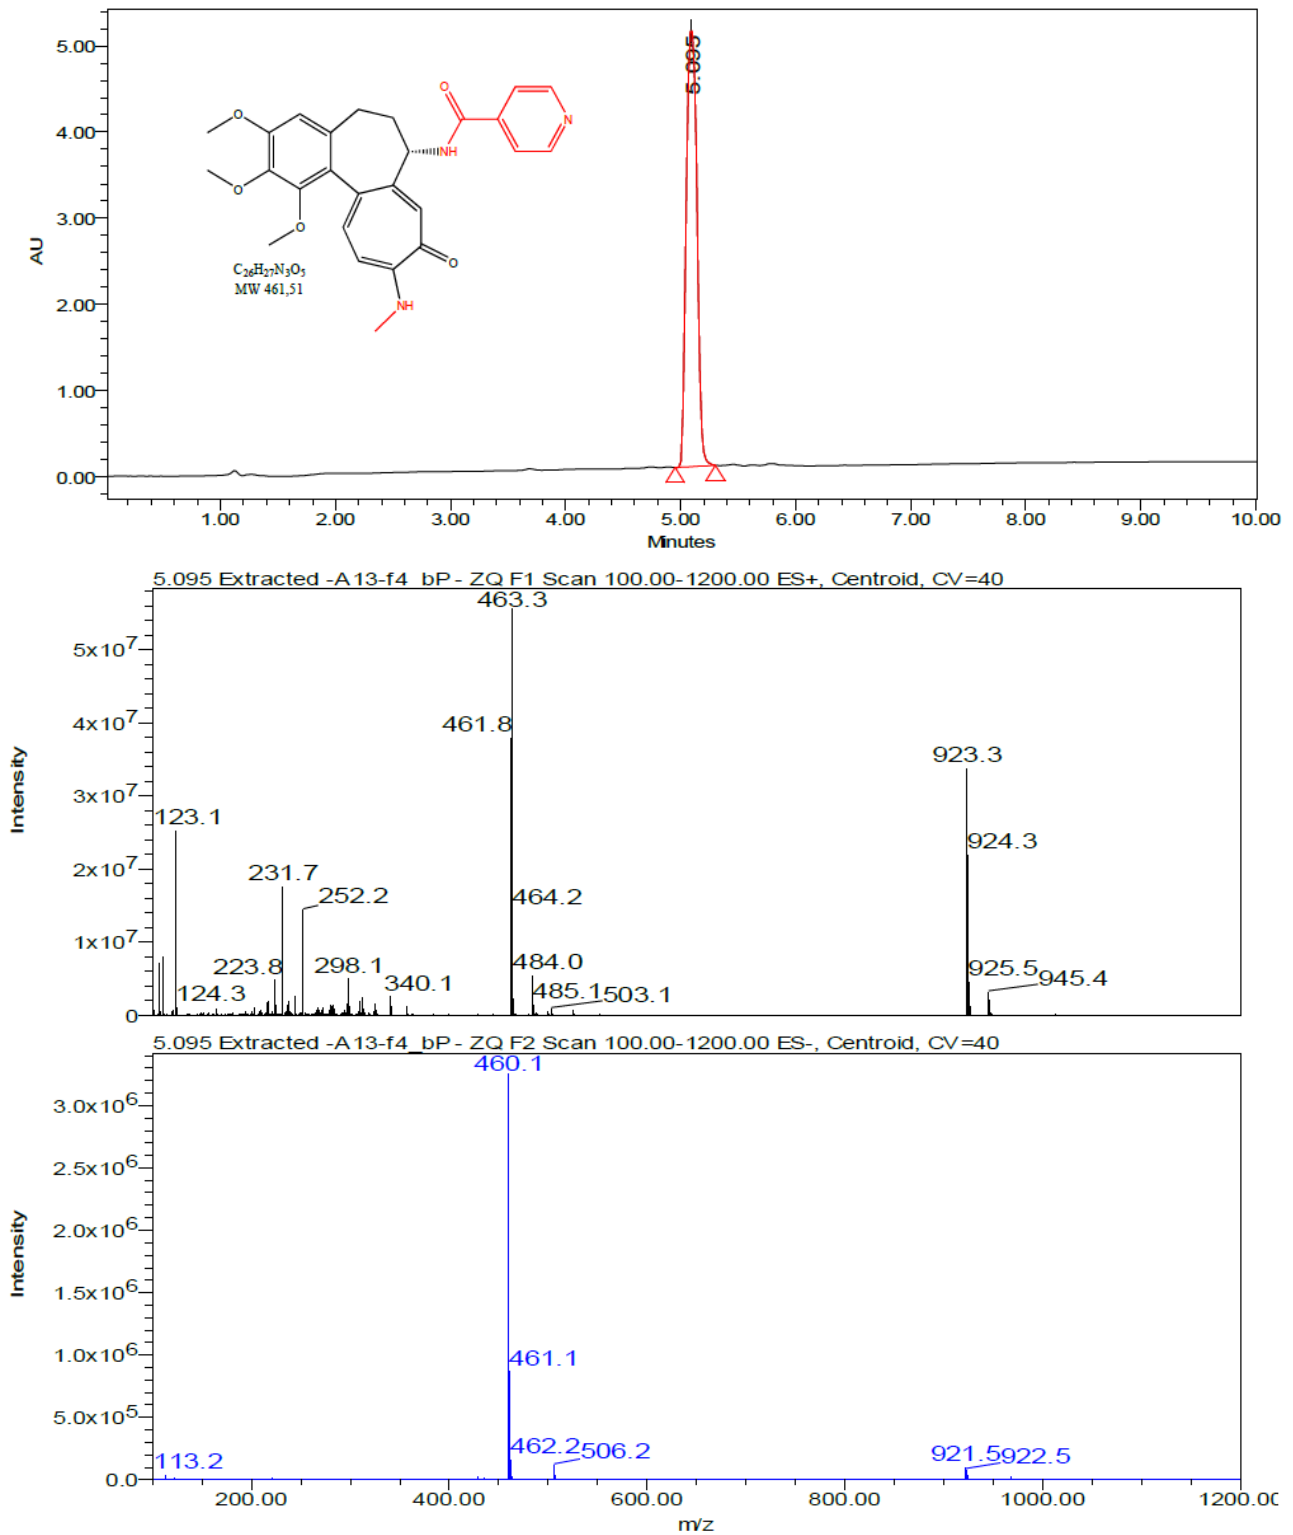

**Figure S43.** The LC-MS chromatogram and mass spectra of **16**.

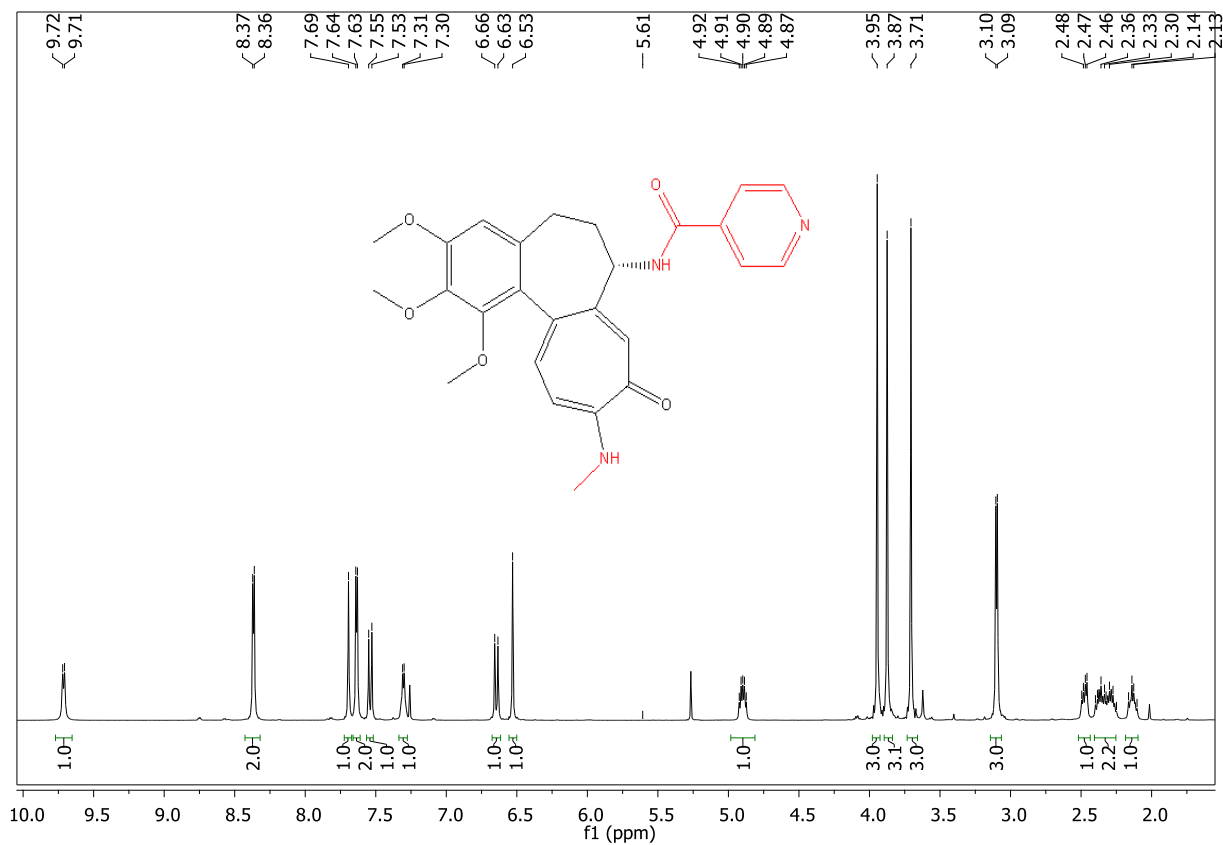

**Figure S44.** The  $^1\text{H}$  NMR spectrum of **16** in  $\text{CDCl}_3$ .

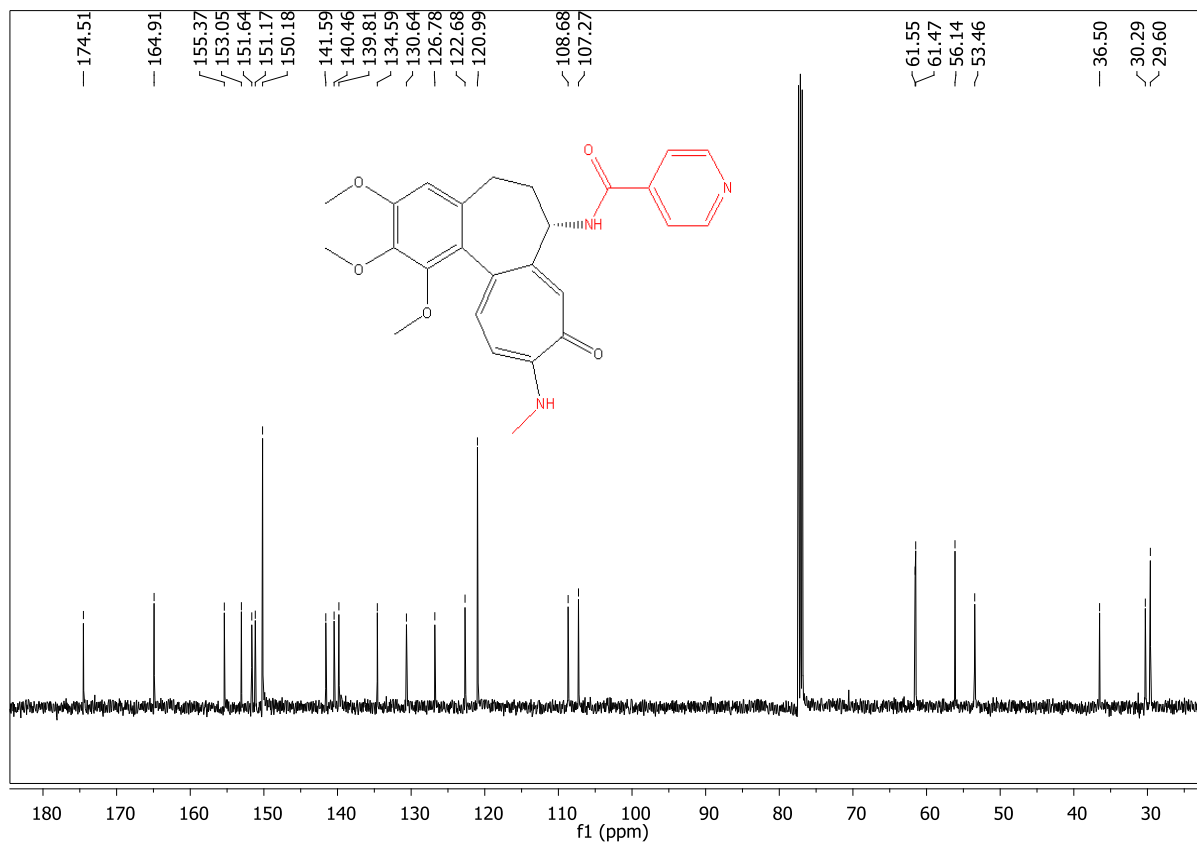

**Figure S45.** The  $^{13}\text{C}$  NMR spectrum of **16** in  $\text{CDCl}_3$ .

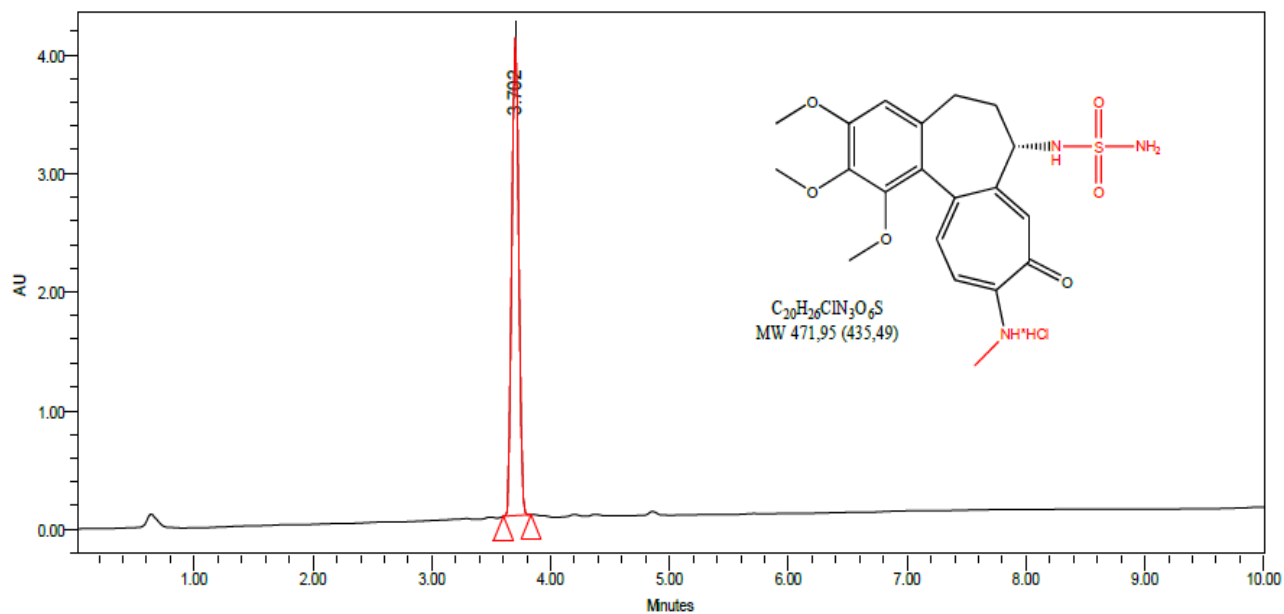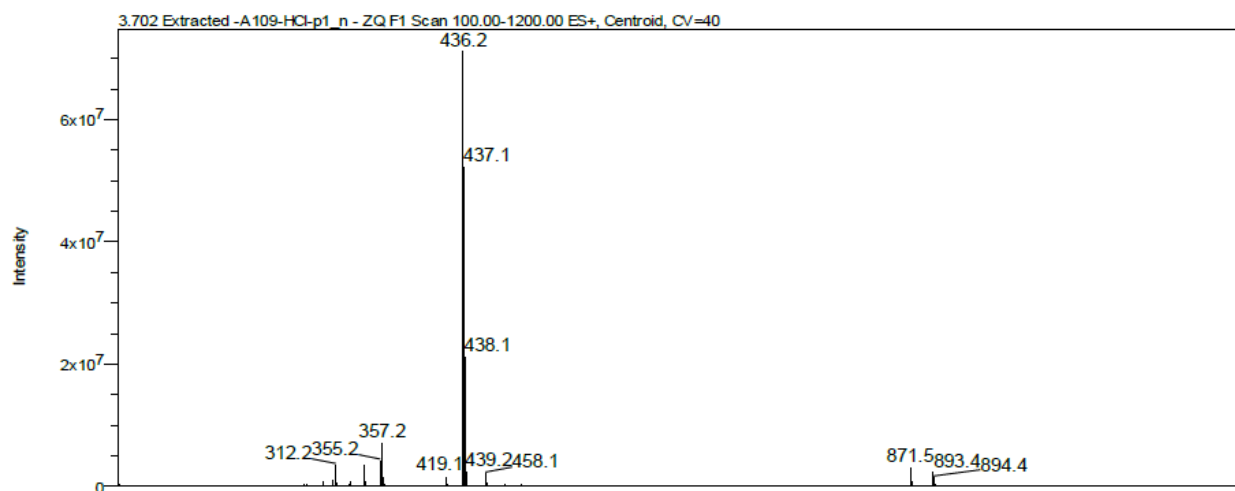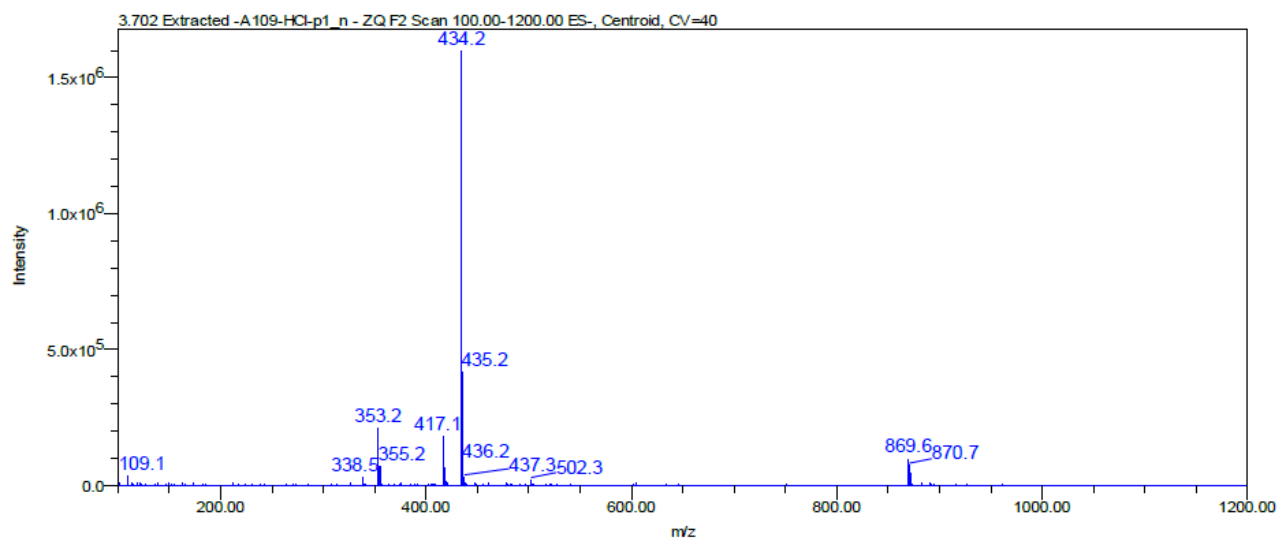

Figure S46. The LC-MS chromatogram and mass spectra of **17**.

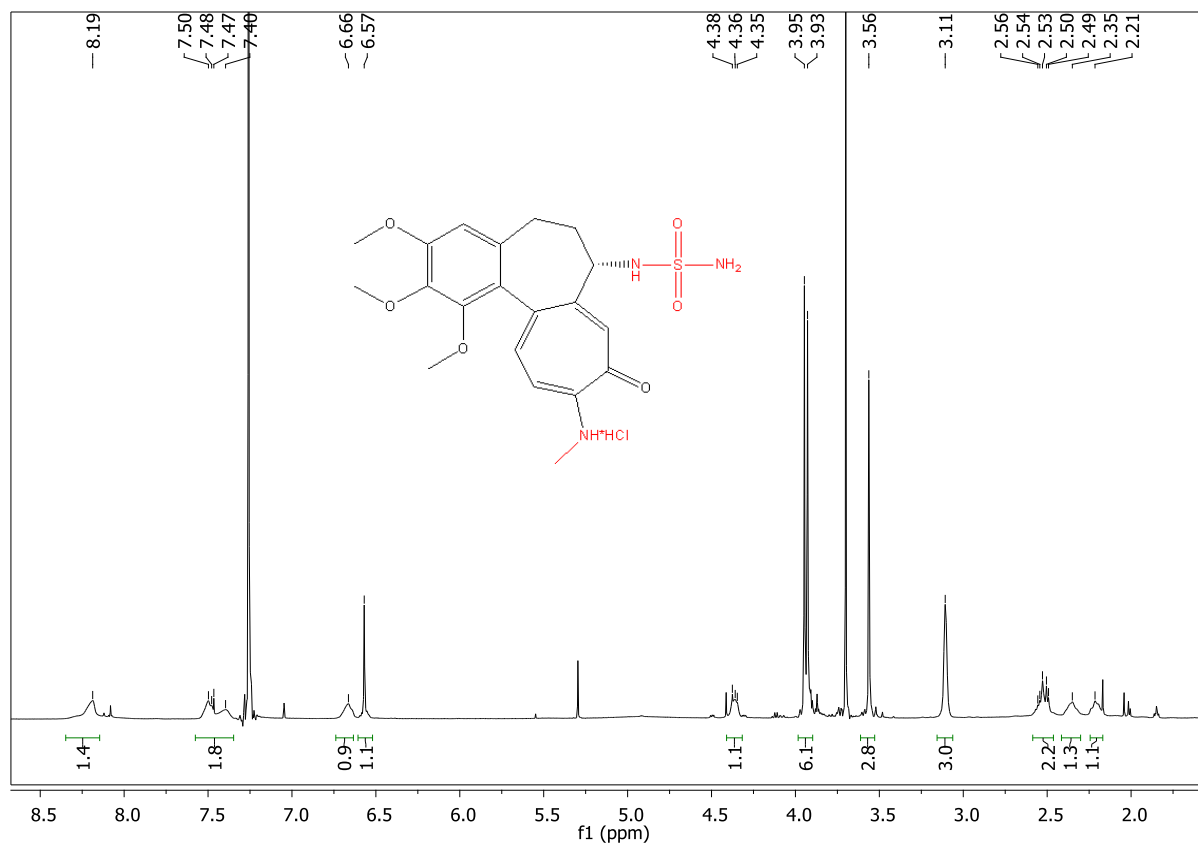

**Figure S47.** The <sup>1</sup>H NMR spectrum of **17** in CDCl<sub>3</sub>.

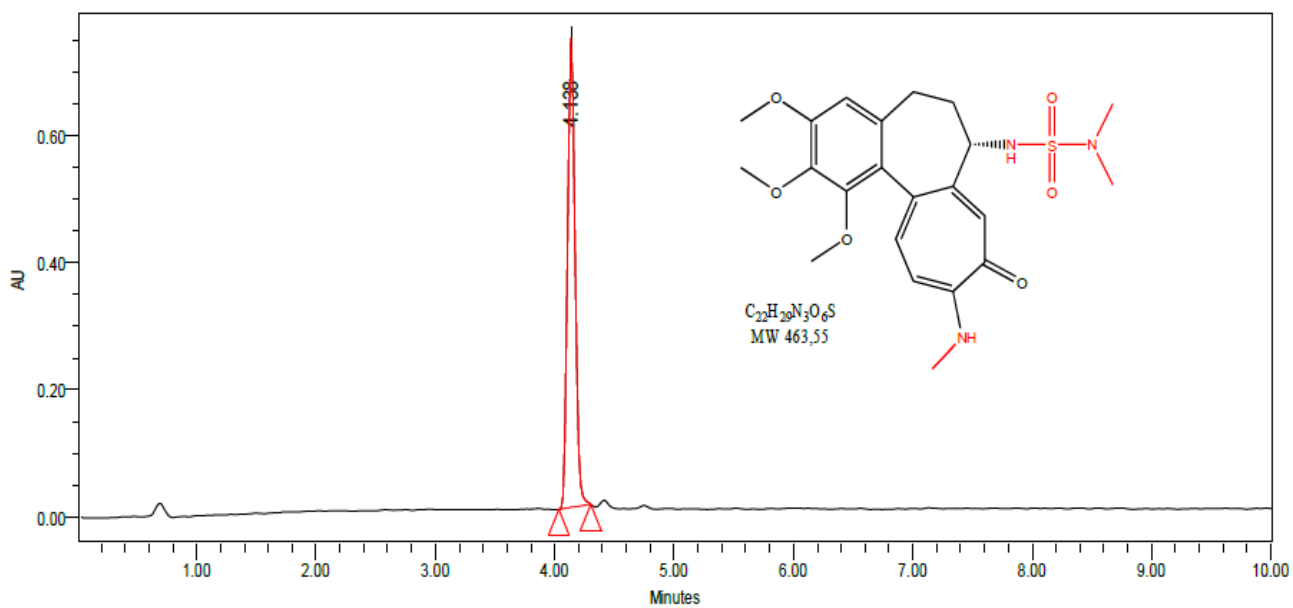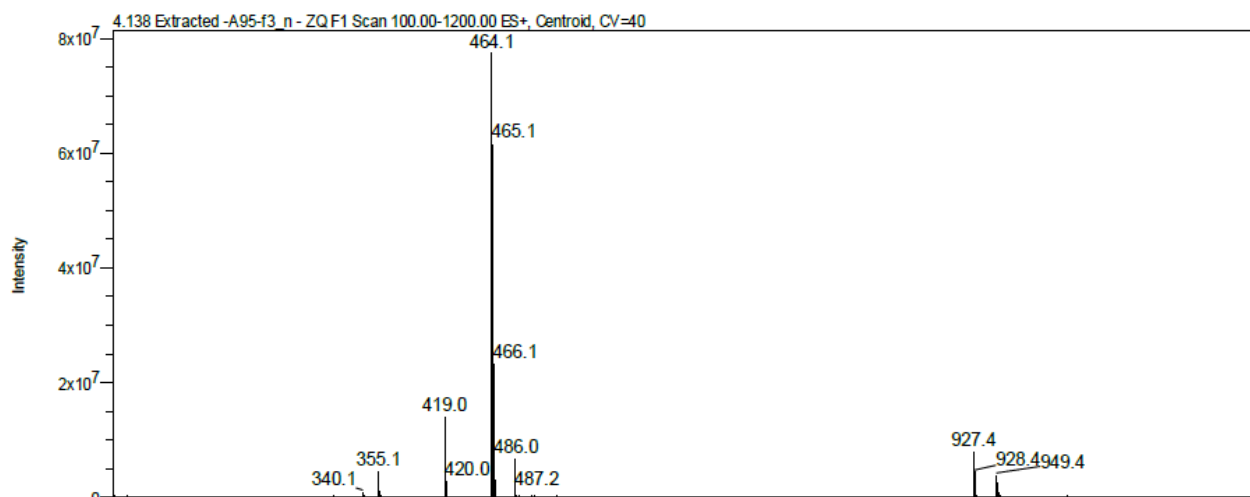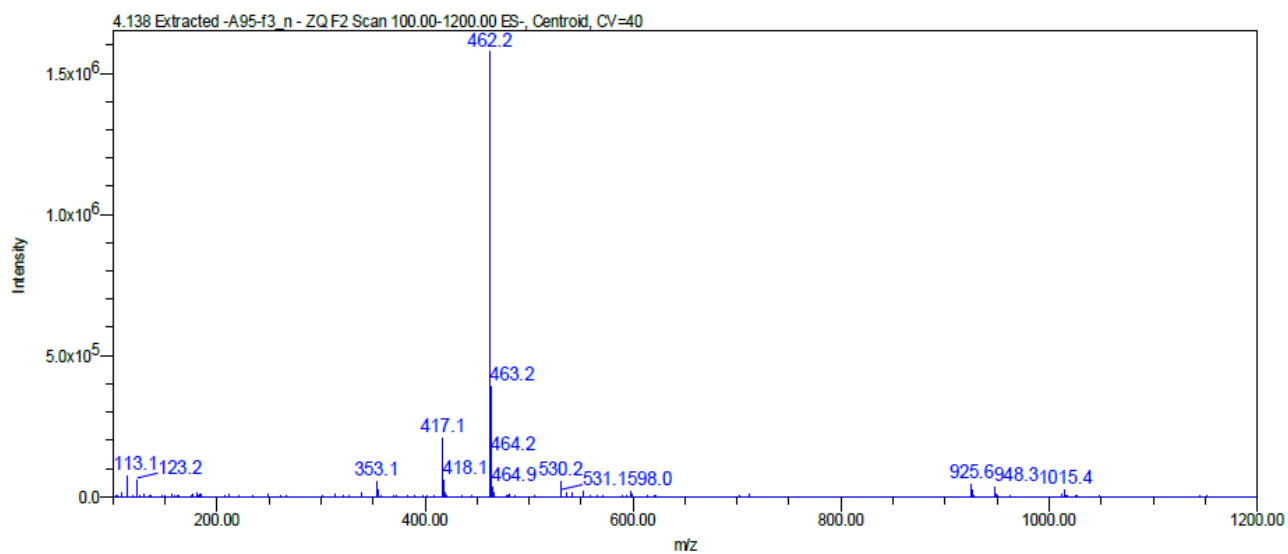

Figure S48. The LC-MS chromatogram and mass spectra of **18**.

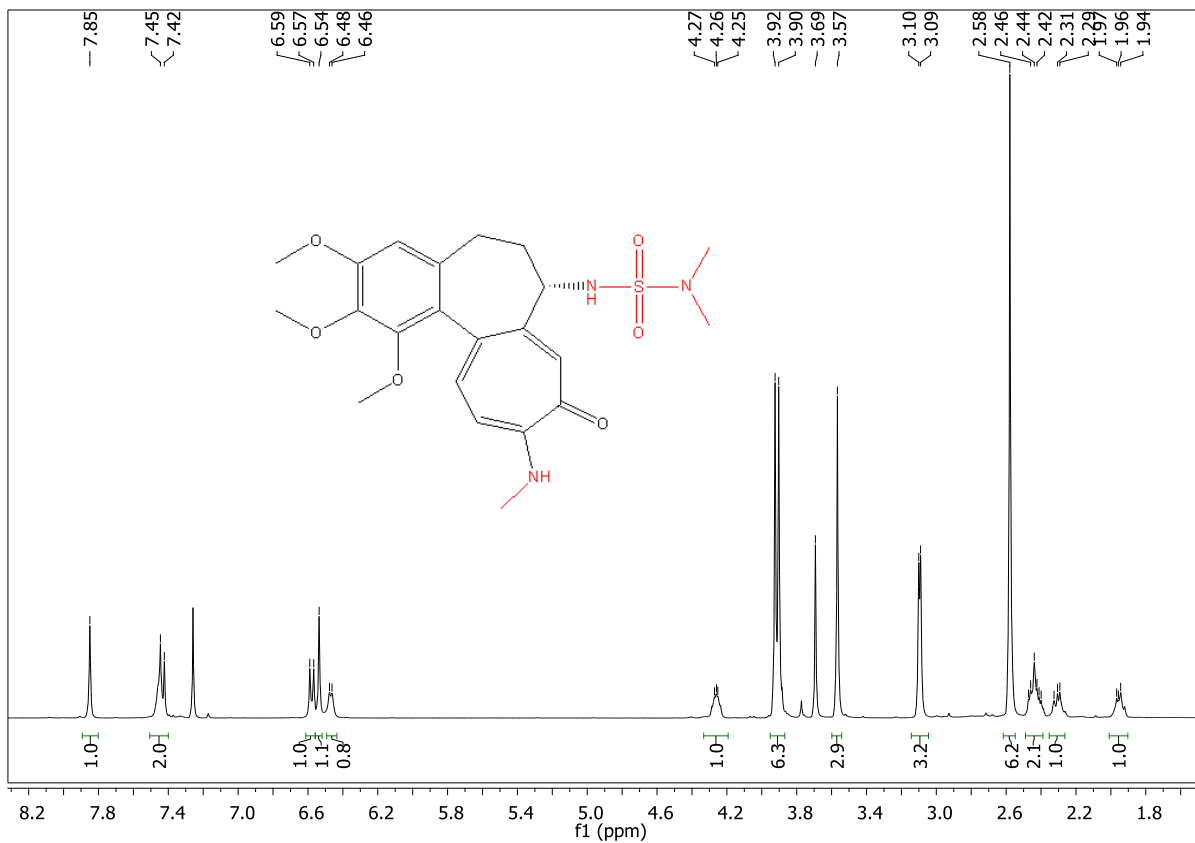

Figure S49. The <sup>1</sup>H NMR spectrum of **18** in CDCl<sub>3</sub>.

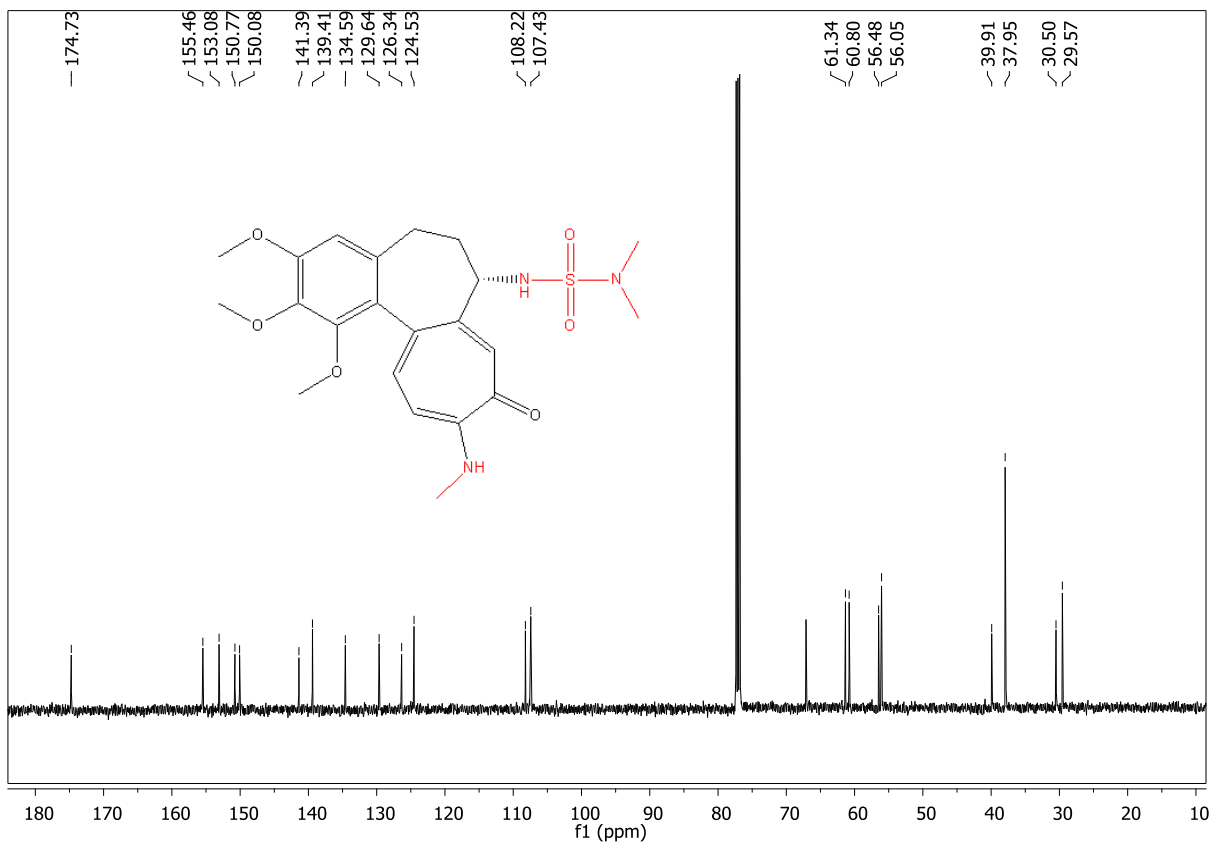

Figure S50. The <sup>13</sup>C NMR spectrum of **18** in CDCl<sub>3</sub>.

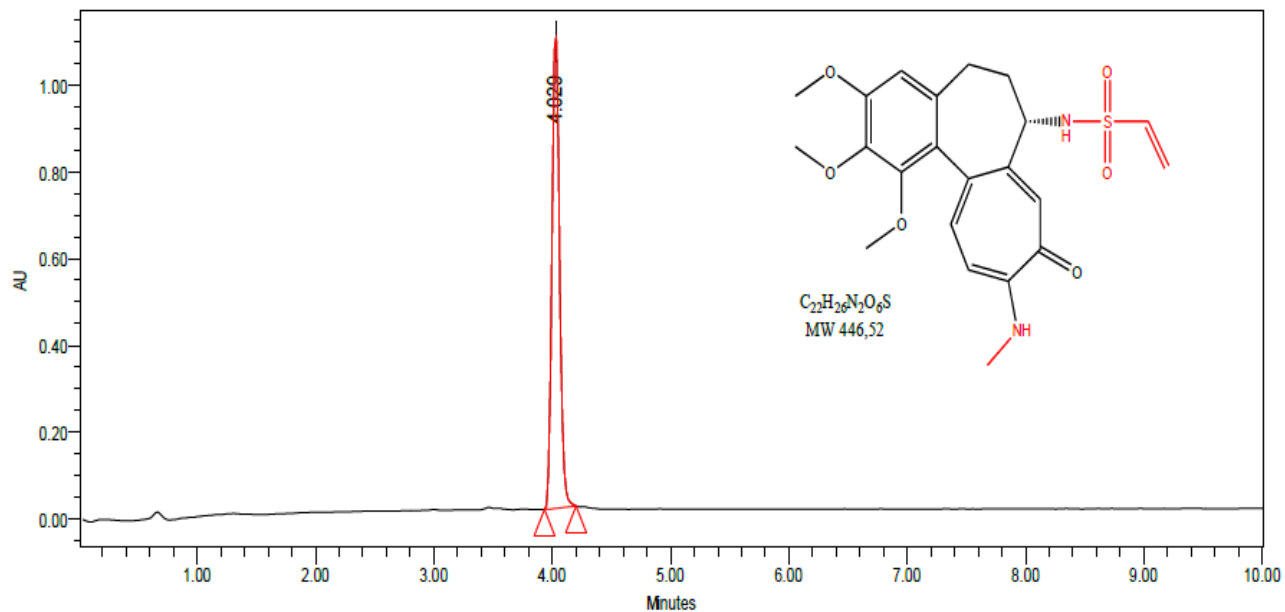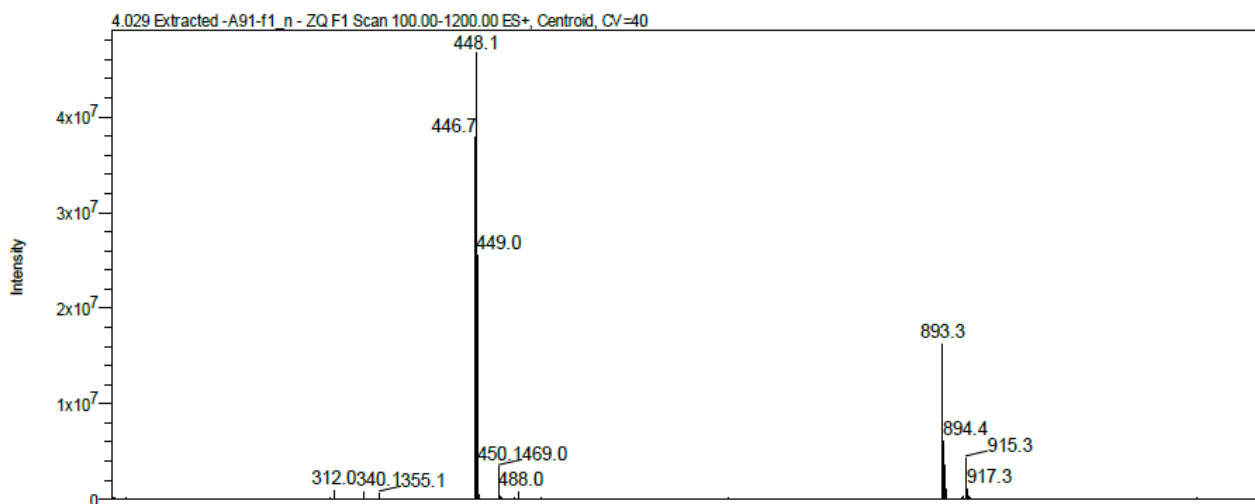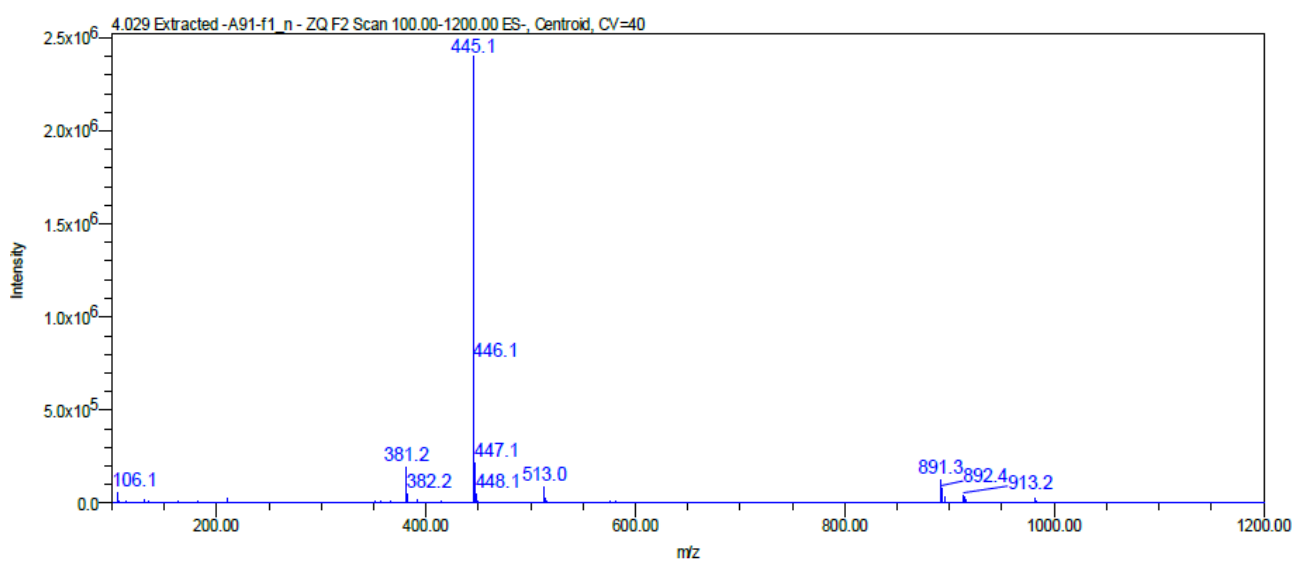

Figure S51. The LC-MS chromatogram and mass spectra of **19**.

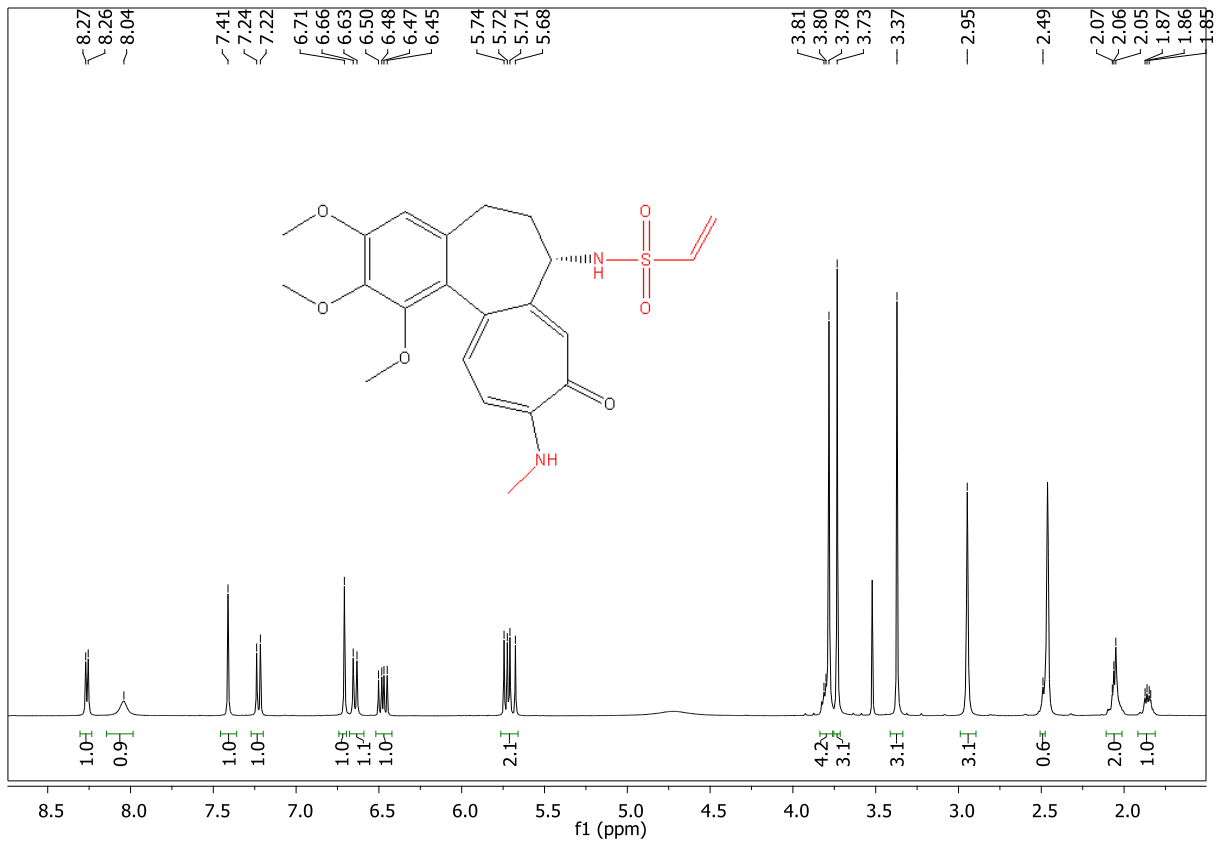

**Figure S52.** The  $^1\text{H}$  NMR spectrum of **19** in  $(\text{CD}_3)_2\text{SO}$ .

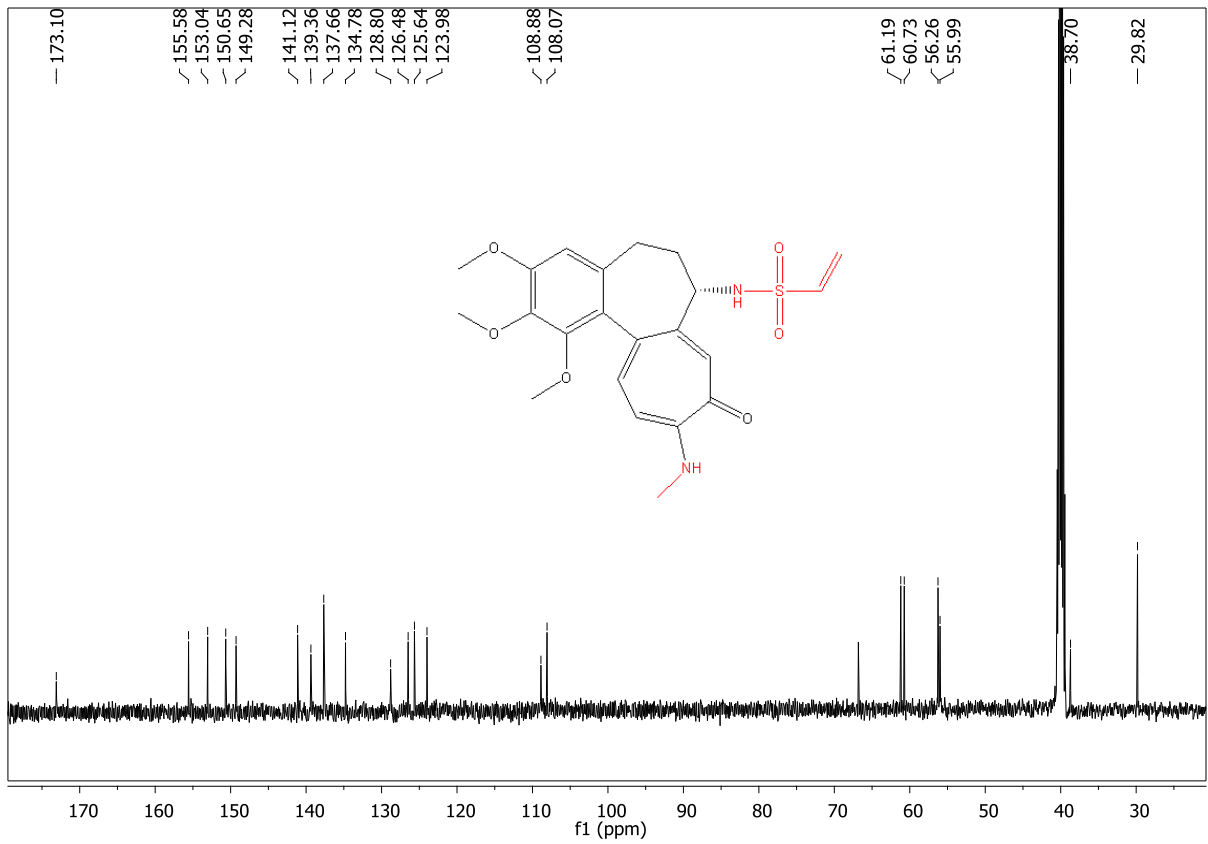

**Figure S53.** The  $^{13}\text{C}$  NMR spectrum of **19** in  $(\text{CD}_3)_2\text{SO}$ .



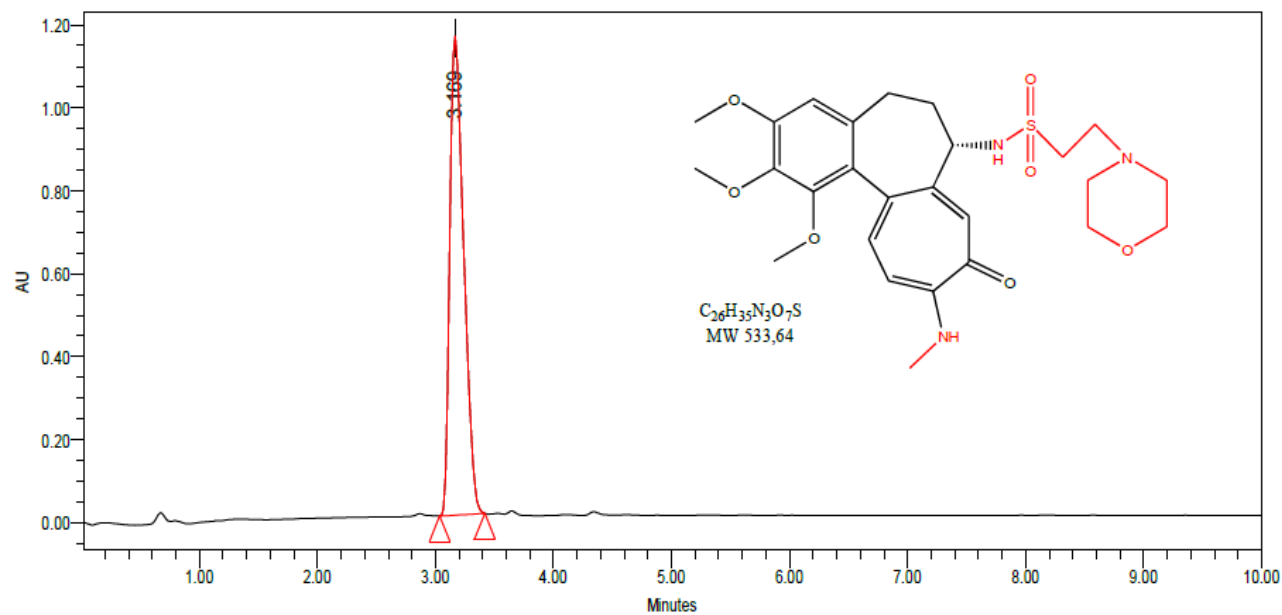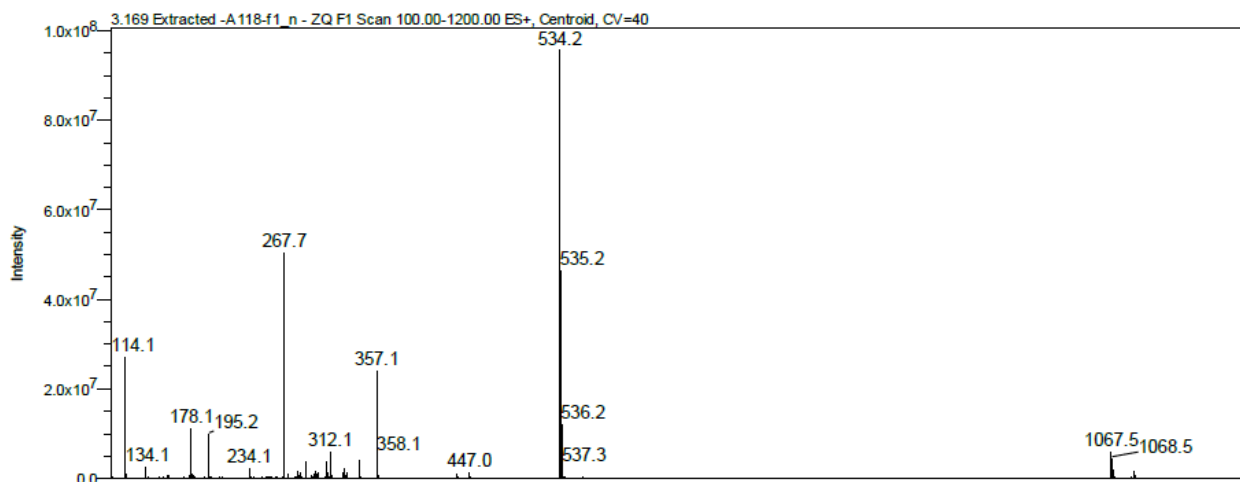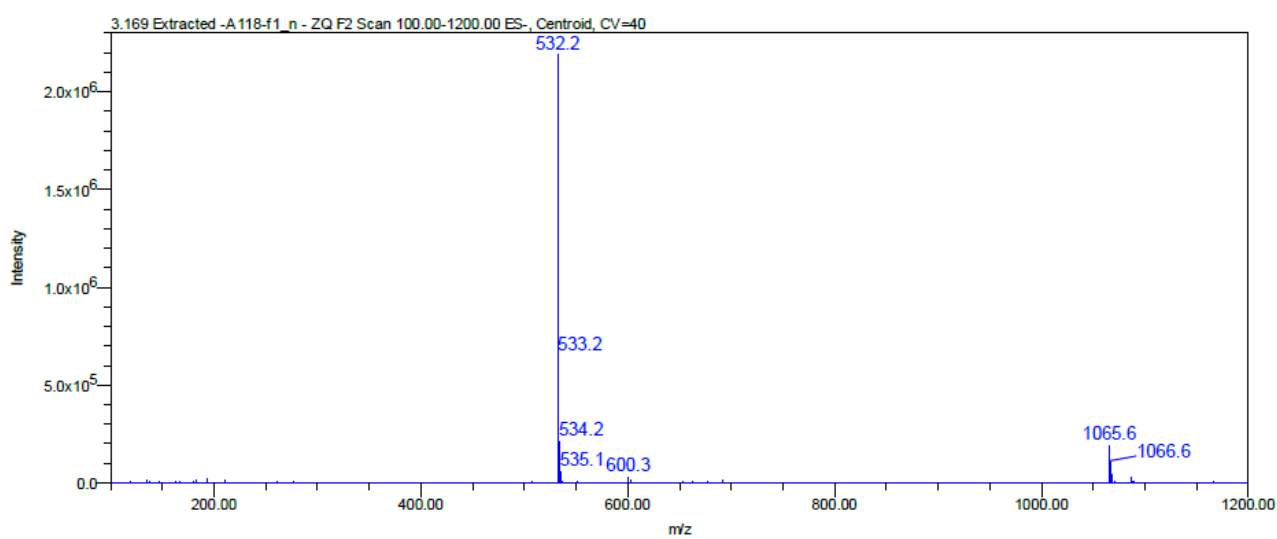

Figure S54. The LC-MS chromatogram and mass spectra of **20**.

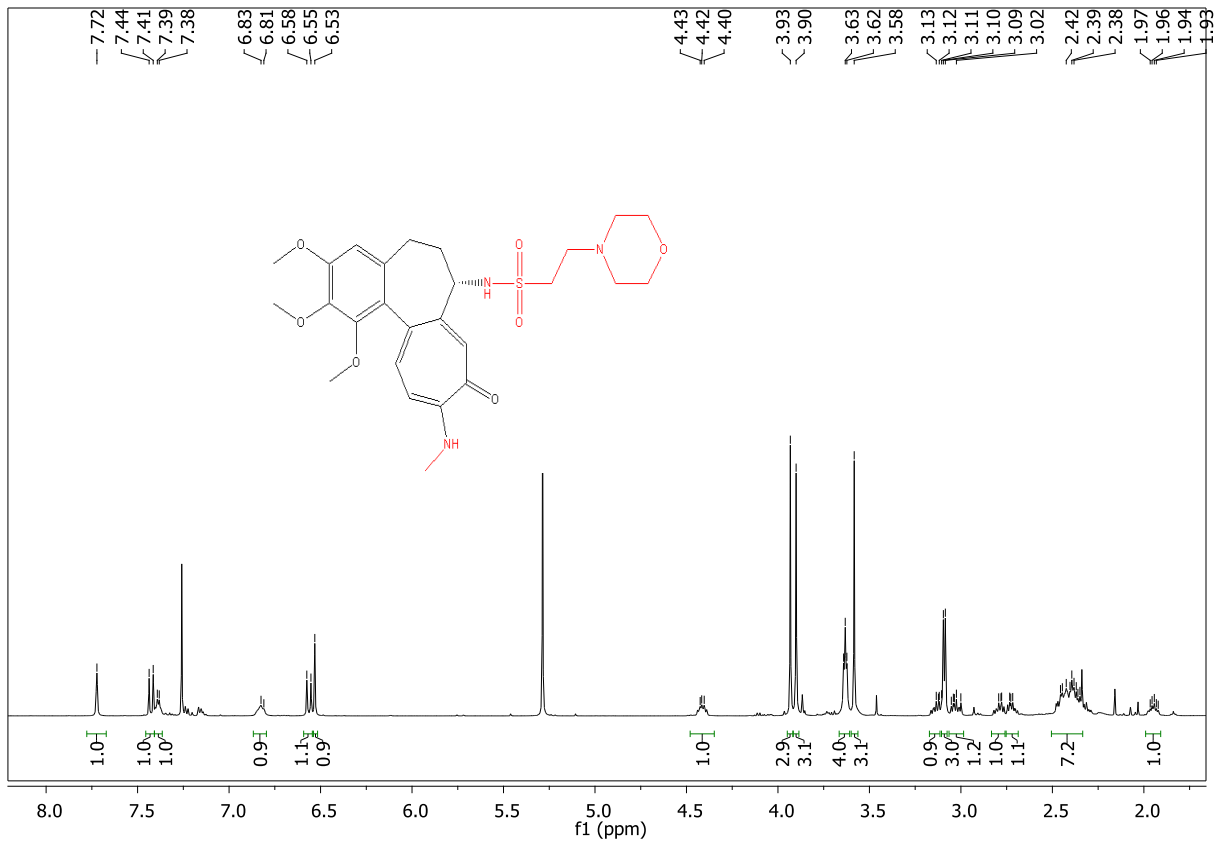

Figure S55. The  $^1\text{H}$  NMR spectrum of **20** in  $\text{CDCl}_3$ .

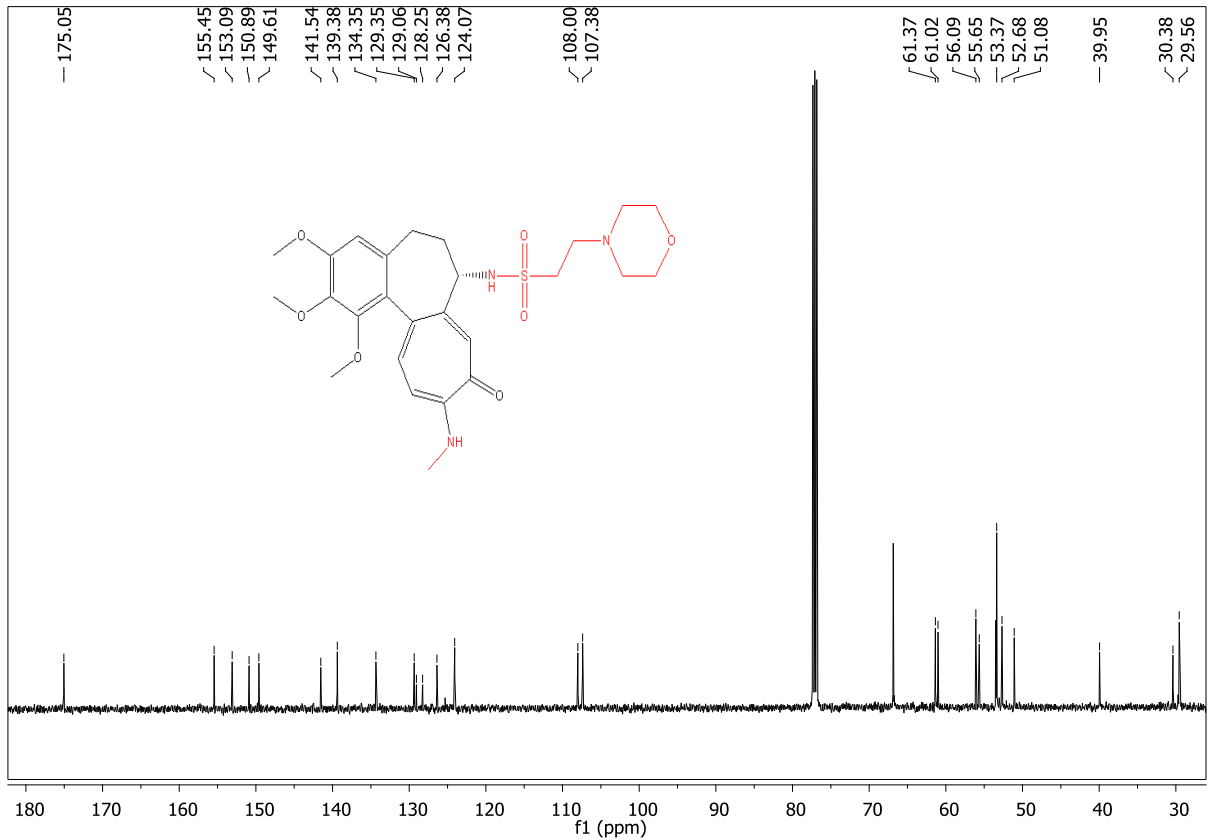

Figure S56. The  $^{13}\text{C}$  NMR spectrum of **20** in  $\text{CDCl}_3$ .

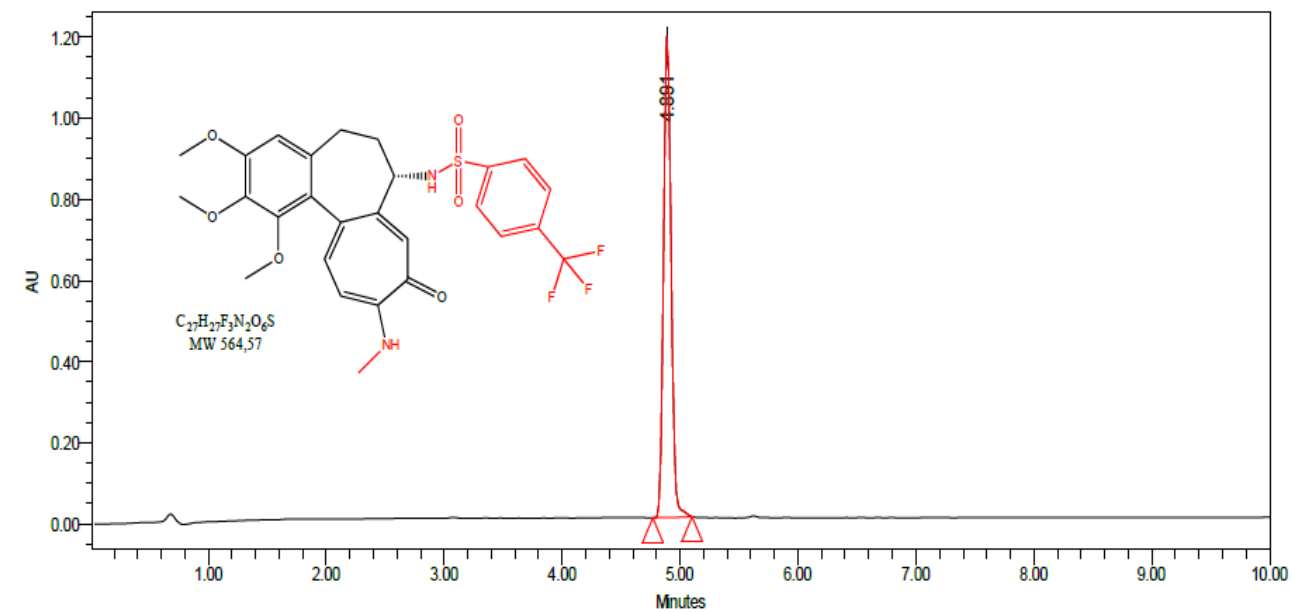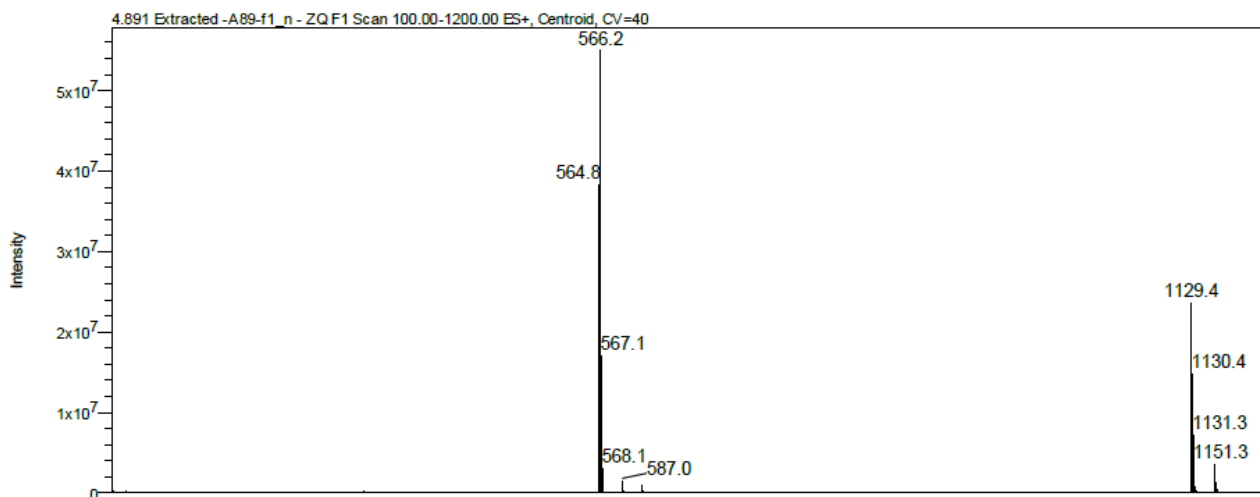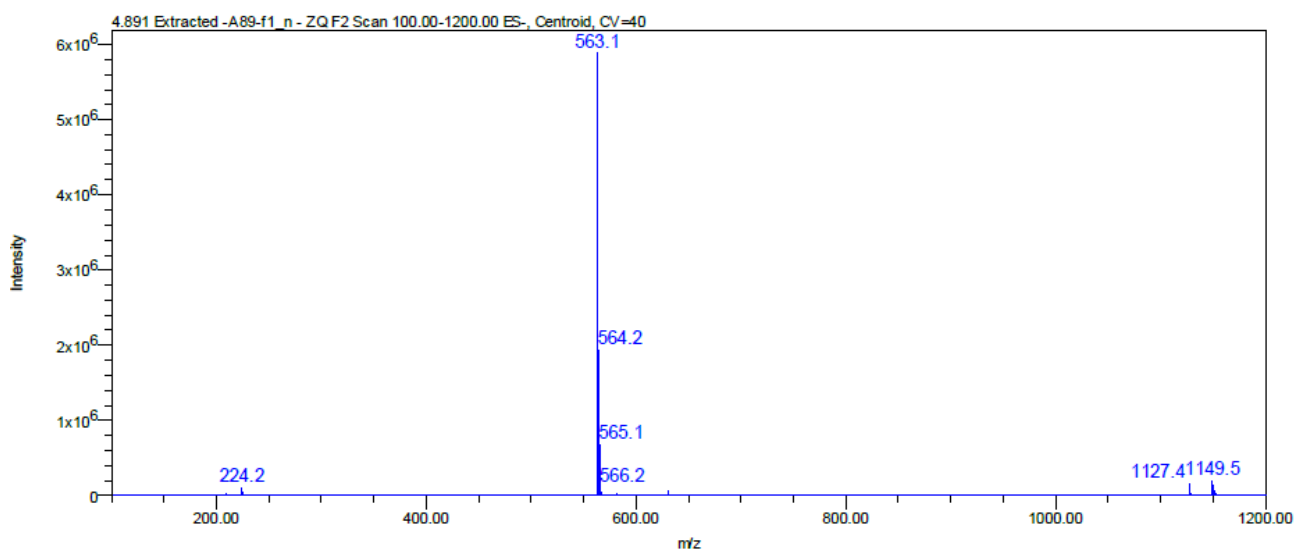

Figure S57. The LC-MS chromatogram and mass spectra of **21**.

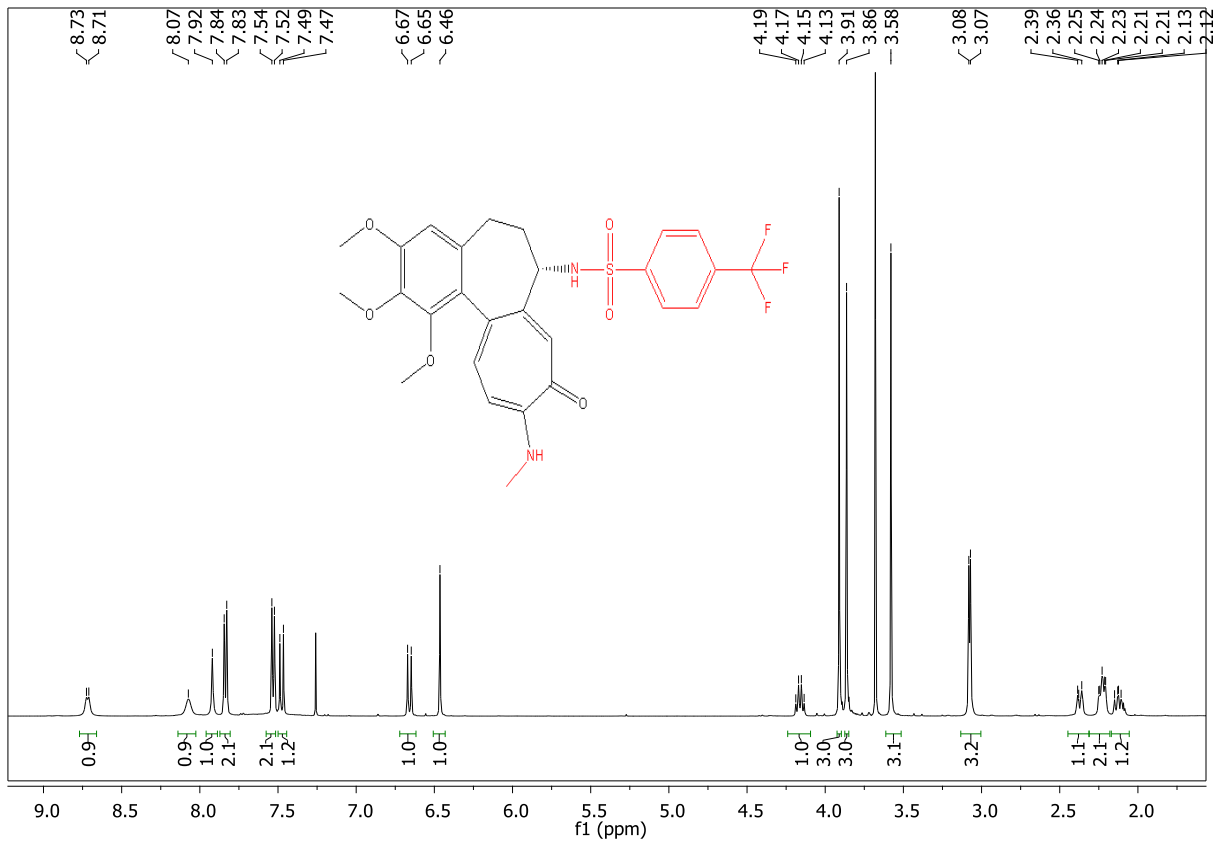

**Figure S58.** The  $^1\text{H}$  NMR spectrum of **21** in  $\text{CDCl}_3$ .

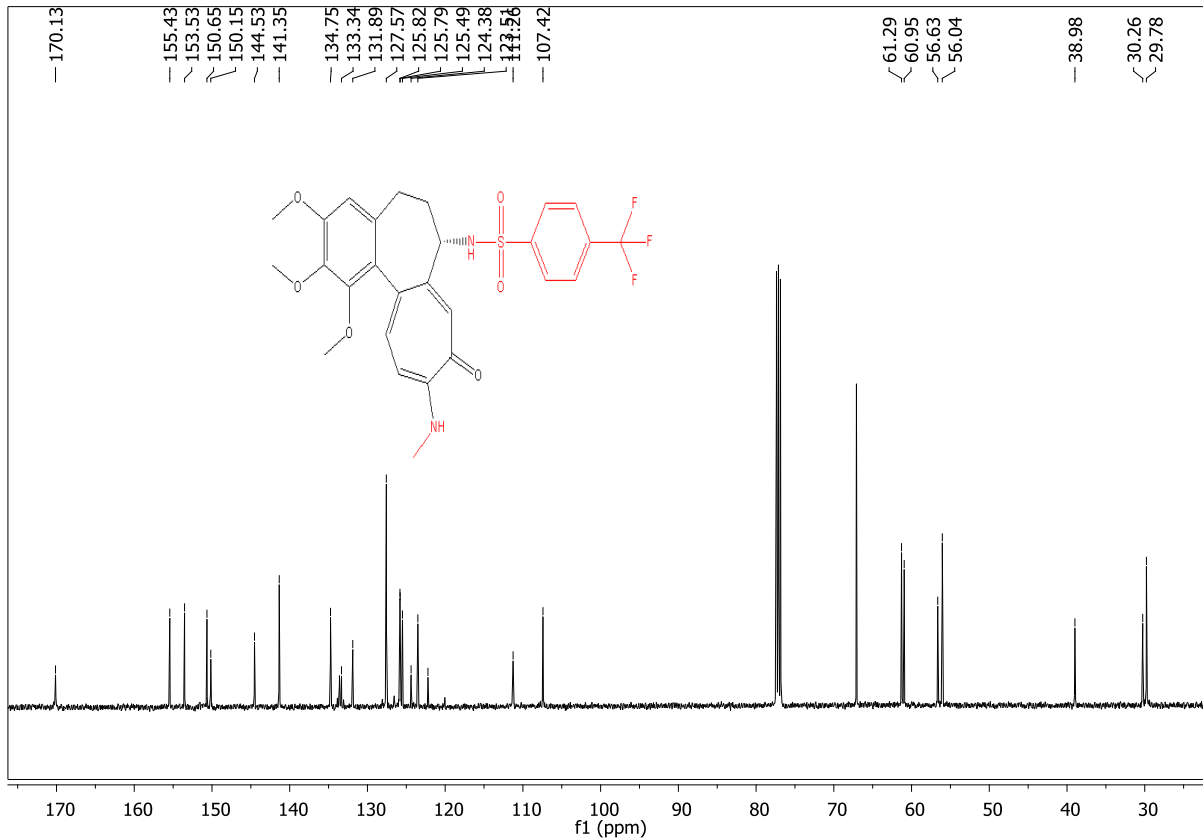

**Figure S59.** The  $^{13}\text{C}$  NMR spectrum of **21** in  $\text{CDCl}_3$ .

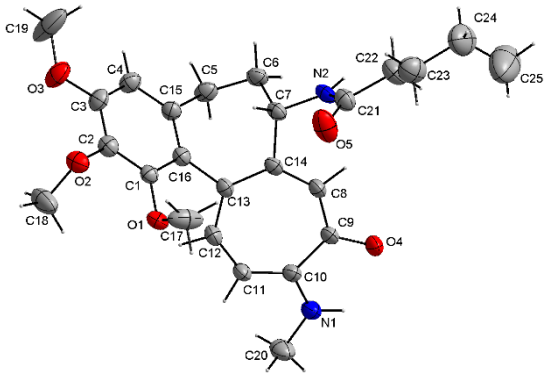

**6 (RT)**

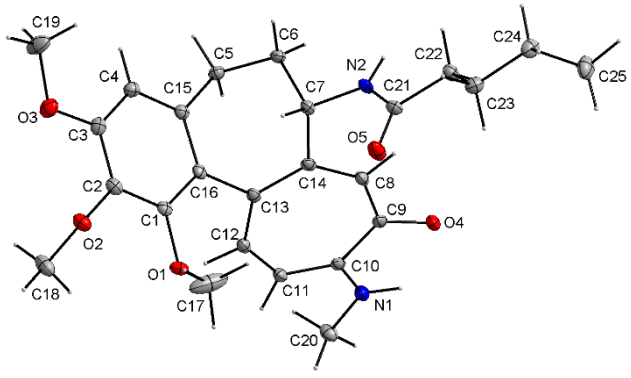

**6 (100 K)**

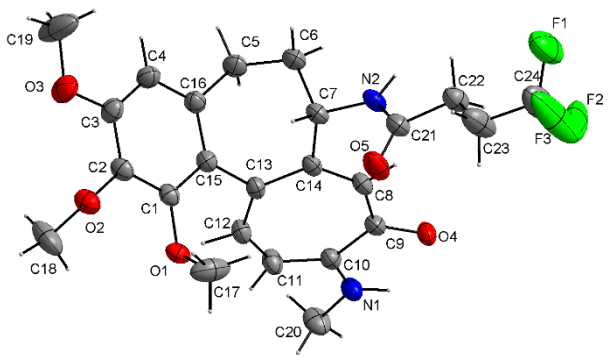

**11 (RT)**

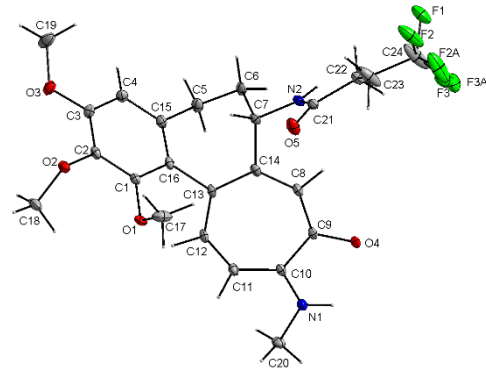

**11 (100 K)**

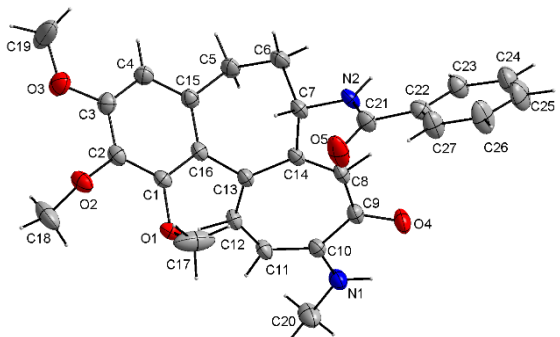

**12 (RT)**

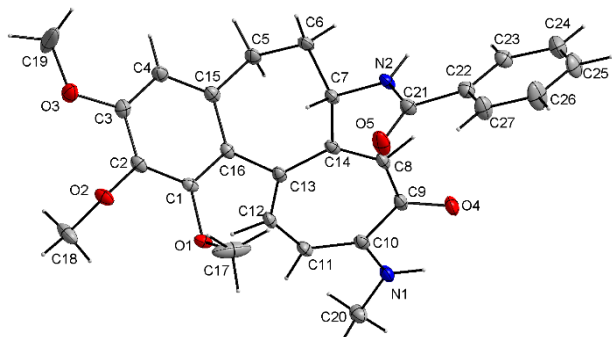

**12 (100 K)**

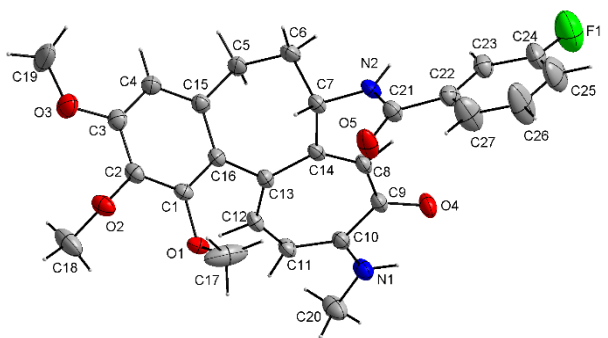

**14 (RT)**

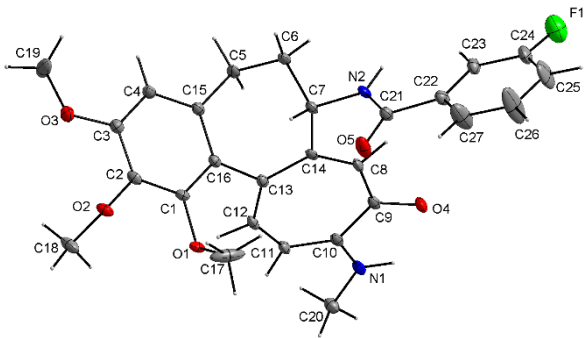

**14 (100 K)**

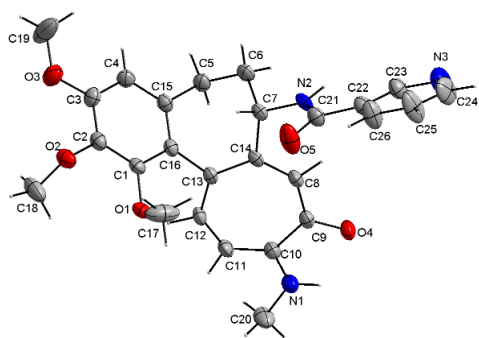

**15 (RT)**

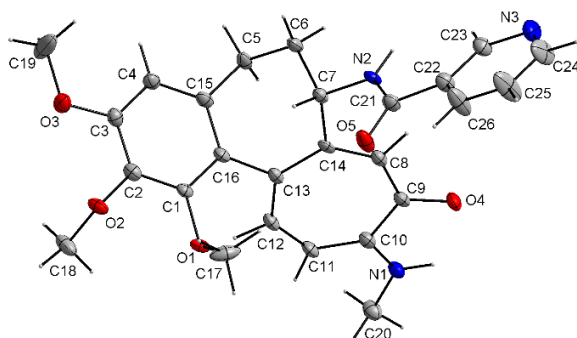

**15 (100 K)**

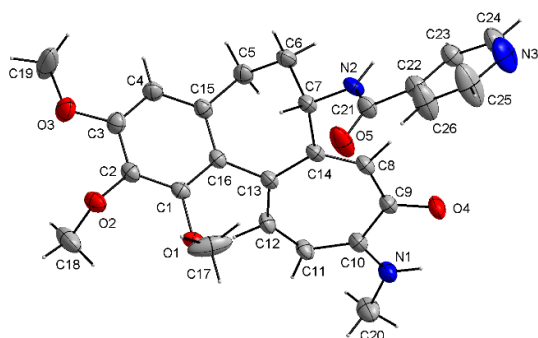

**16 (RT)**

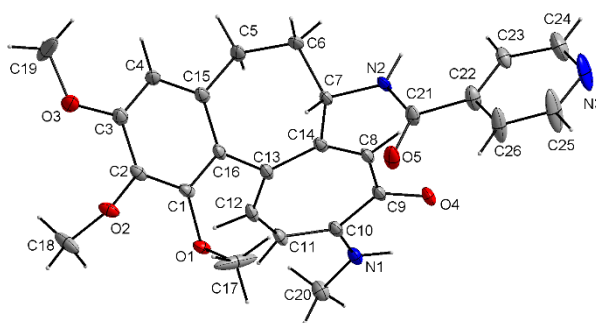

**16 (100 K)**

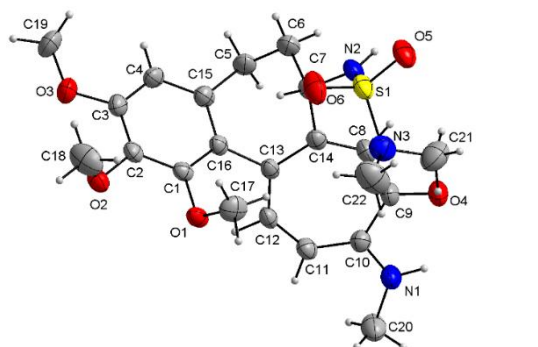

**18 (RT)**

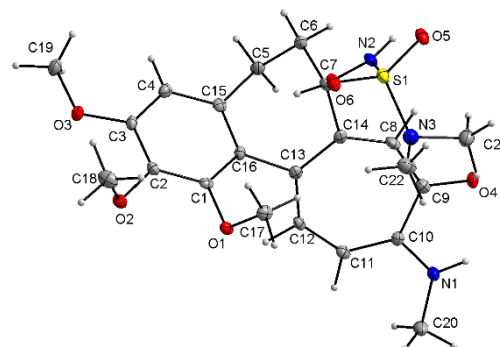

**18 (100 K)**

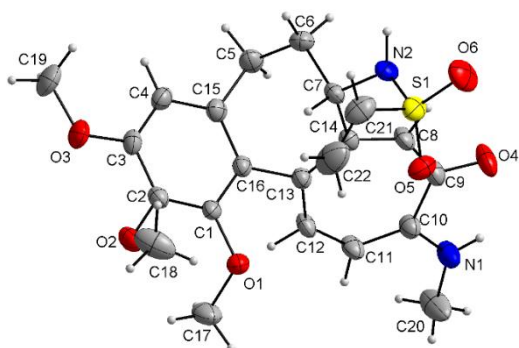

**19 (RT)**

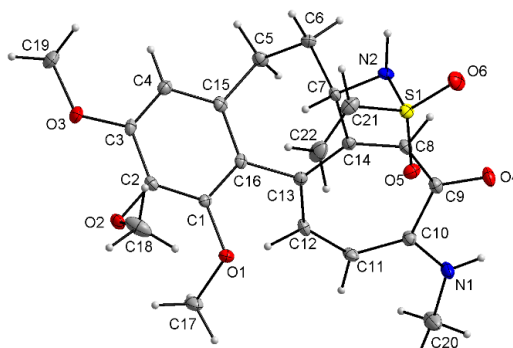

**19 (100 K)**

**Figure S60.** Molecular structures of colchicine derivatives (**6**, **11**, **12**, **14**, **15**, **16**, **18** and **19**) at 295 K and 100 K.
